# Supplementary material for: Mantyl tagged oligo α (1 → 2) mannosides as Candida albicans β-mannosyl transferases substrates: a comparison between synthetic strategies
Source: Royal Society of Chemistry journal article supplement (doi:10.1039/c3ra43340d), 2013-01-01
Supplement: c3ra43340d.pdf [file c3ra43340d.pdf]

## **Mantyl tagged oligo $\alpha$ (1- $\rightarrow$ 2) mannosides as *Candida albicans* $\beta$ -mannosyltransferases substrates: a comparison between synthetic strategies**

Marilyne Pourcelot , Laurent Cattiaux, Ghenima Sfihi-Loualia, Emeline Fabre, Frédéric Krzewinski, Chantal Fradin , Daniel Poulain , Florence Delplace , Yann Guérardel , Jean-Maurice Mallet \*

RSC Advances, 2013

Supplementary information:

$^1\text{H}$  and  $^{13}\text{C}$  NMR spectra of synthesized compounds

MP1/14

2

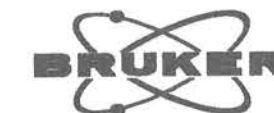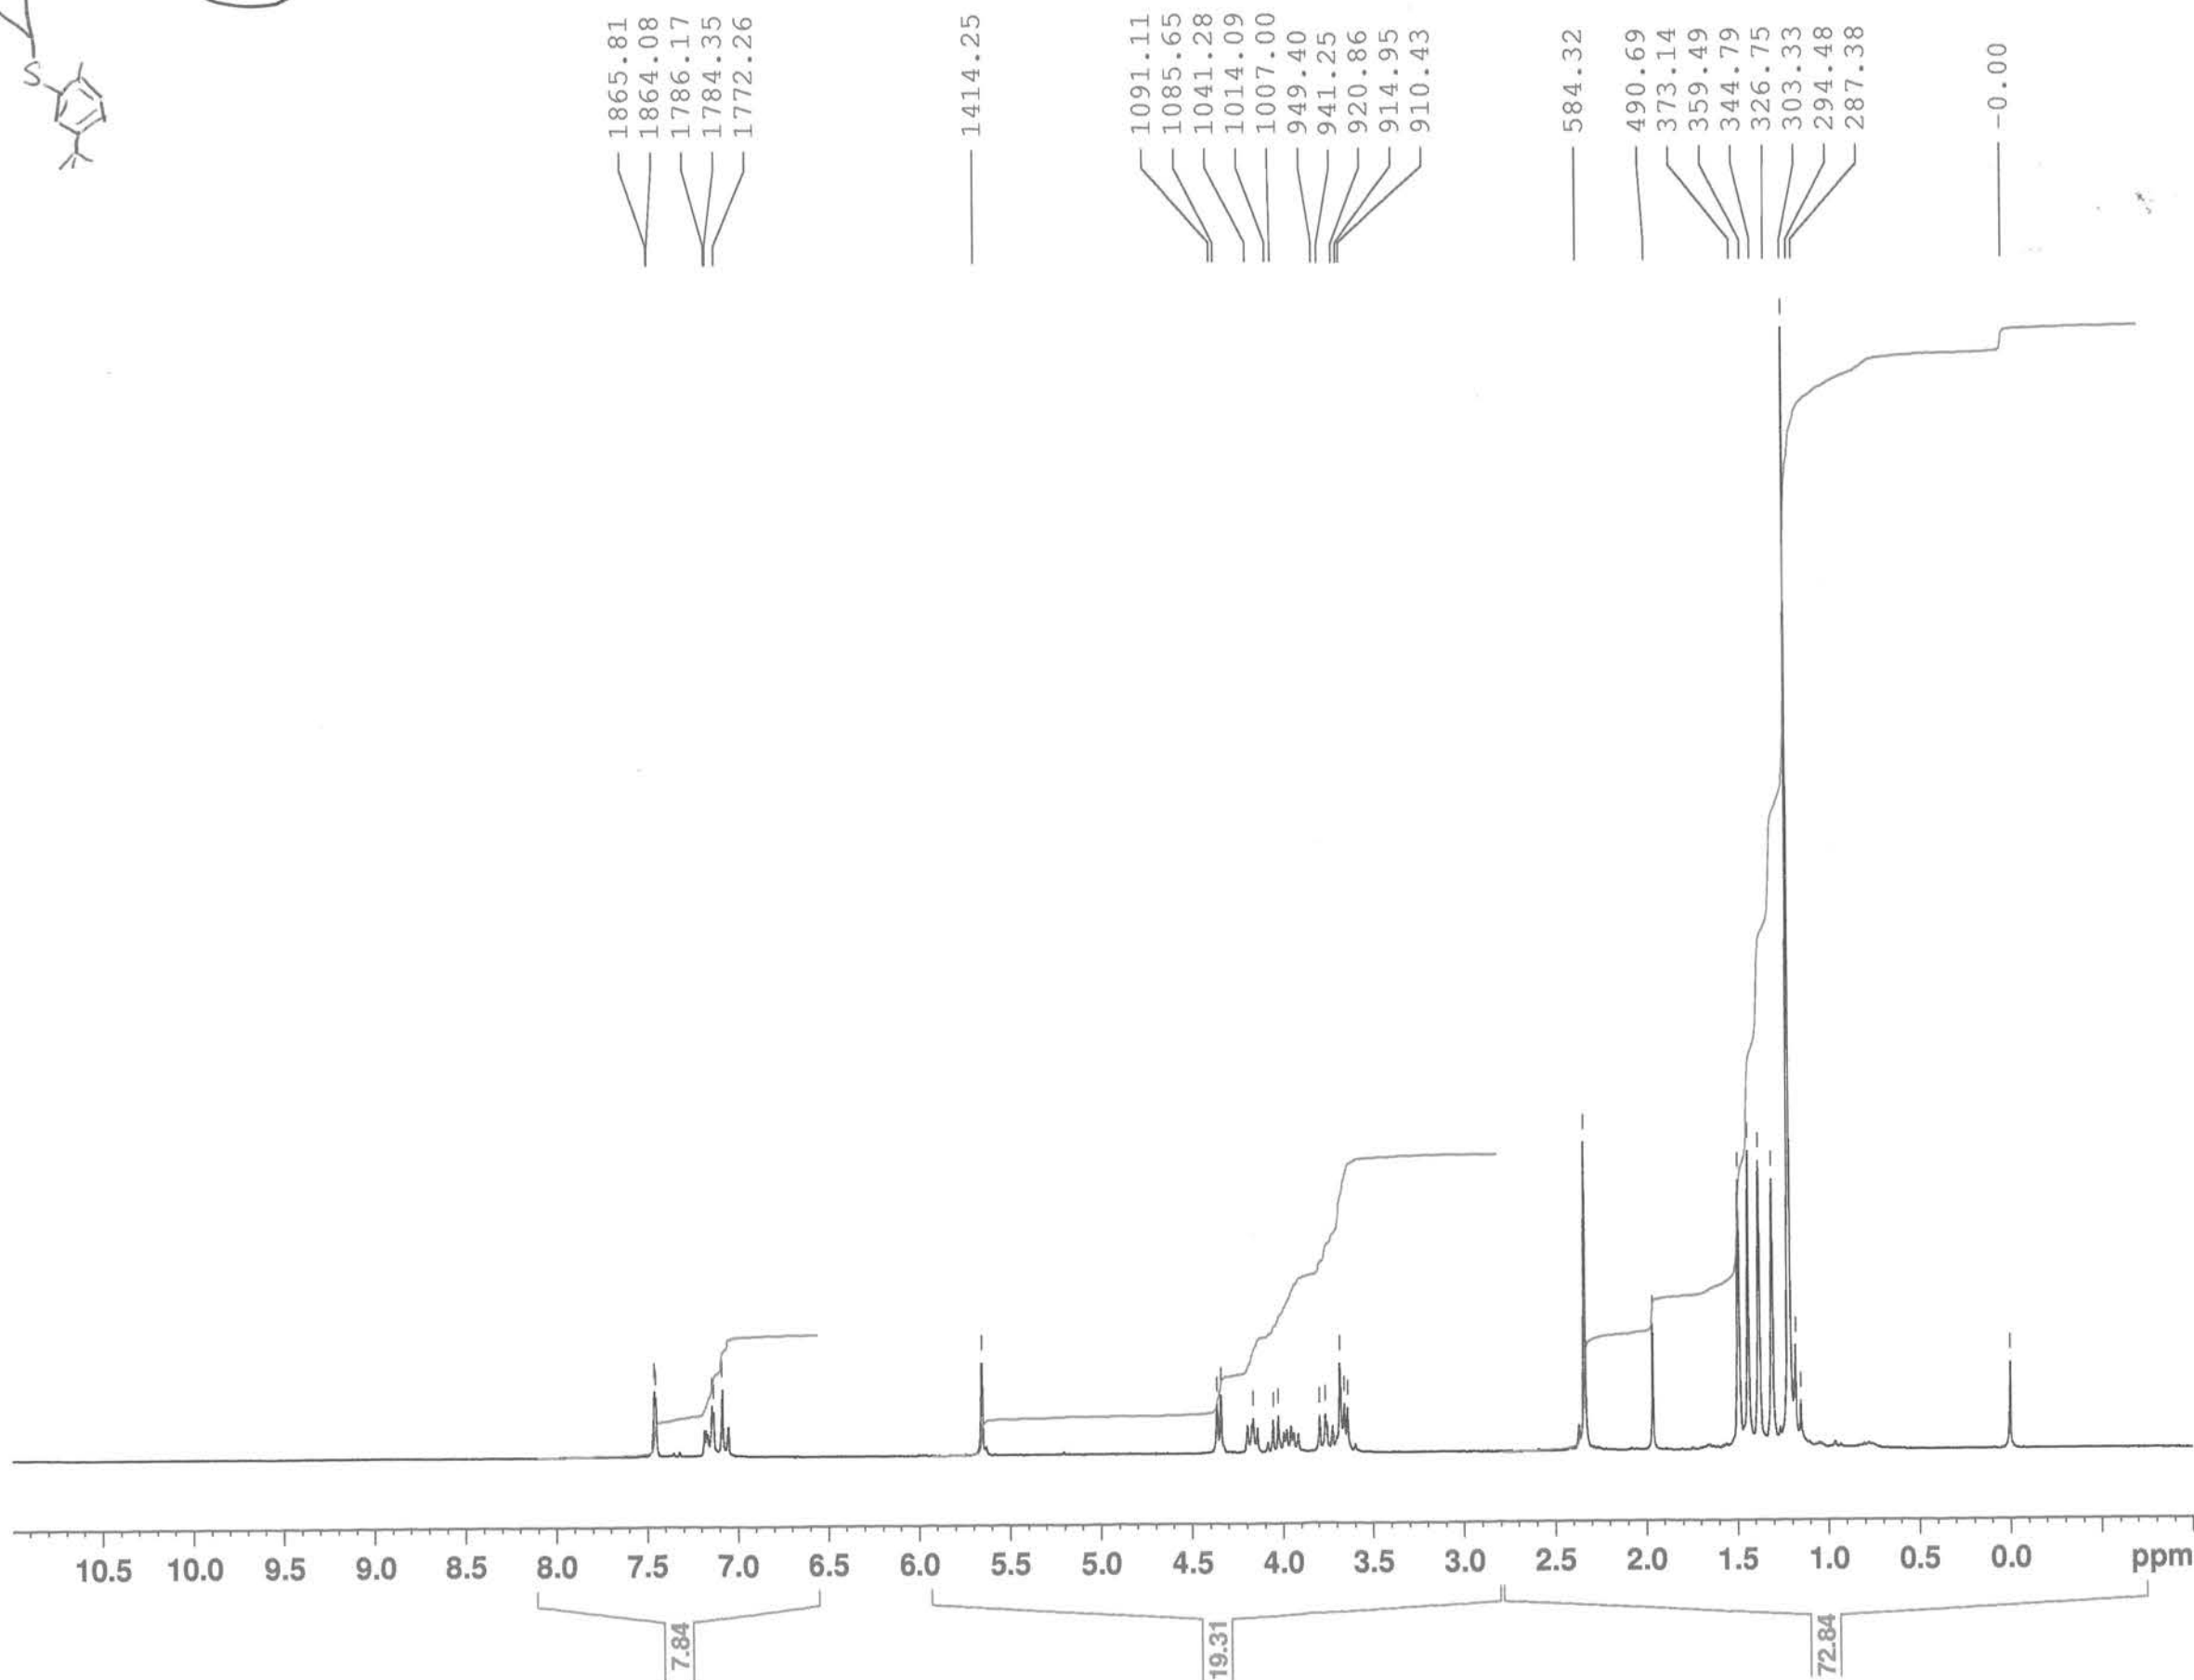

Current Data Parameters  
NAME May27-2011-JMM  
EXPNO 60  
PROCNO 1

F2 - Acquisition Parameters  
Date\_ 20110527  
Time 13.47  
INSTRUM spect  
PROBHD 5 mm QNP 1H/1  
PULPROG zg30  
TD 16384  
SOLVENT CDC13  
NS 64  
DS 2  
SWH 5175.983 Hz  
FIDRES 0.315917 Hz  
AQ 1.5827444 sec  
RG 114  
DW 96.600 usec  
DE 8.00 usec  
TE 300.0 K  
D1 0.20000000 sec  
TD0 1

==== CHANNEL f1 =====  
NUC1 1H  
P1 10.00 usec  
PL1 -3.00 dB  
SFO1 250.1315446 MHz

F2 - Processing parameters  
SI 8192  
SF 250.1300270 MHz  
WDW EM  
SSB 0  
LB 0.30 Hz  
GB 0  
PC 1.00

3

MP1/21

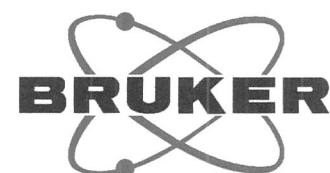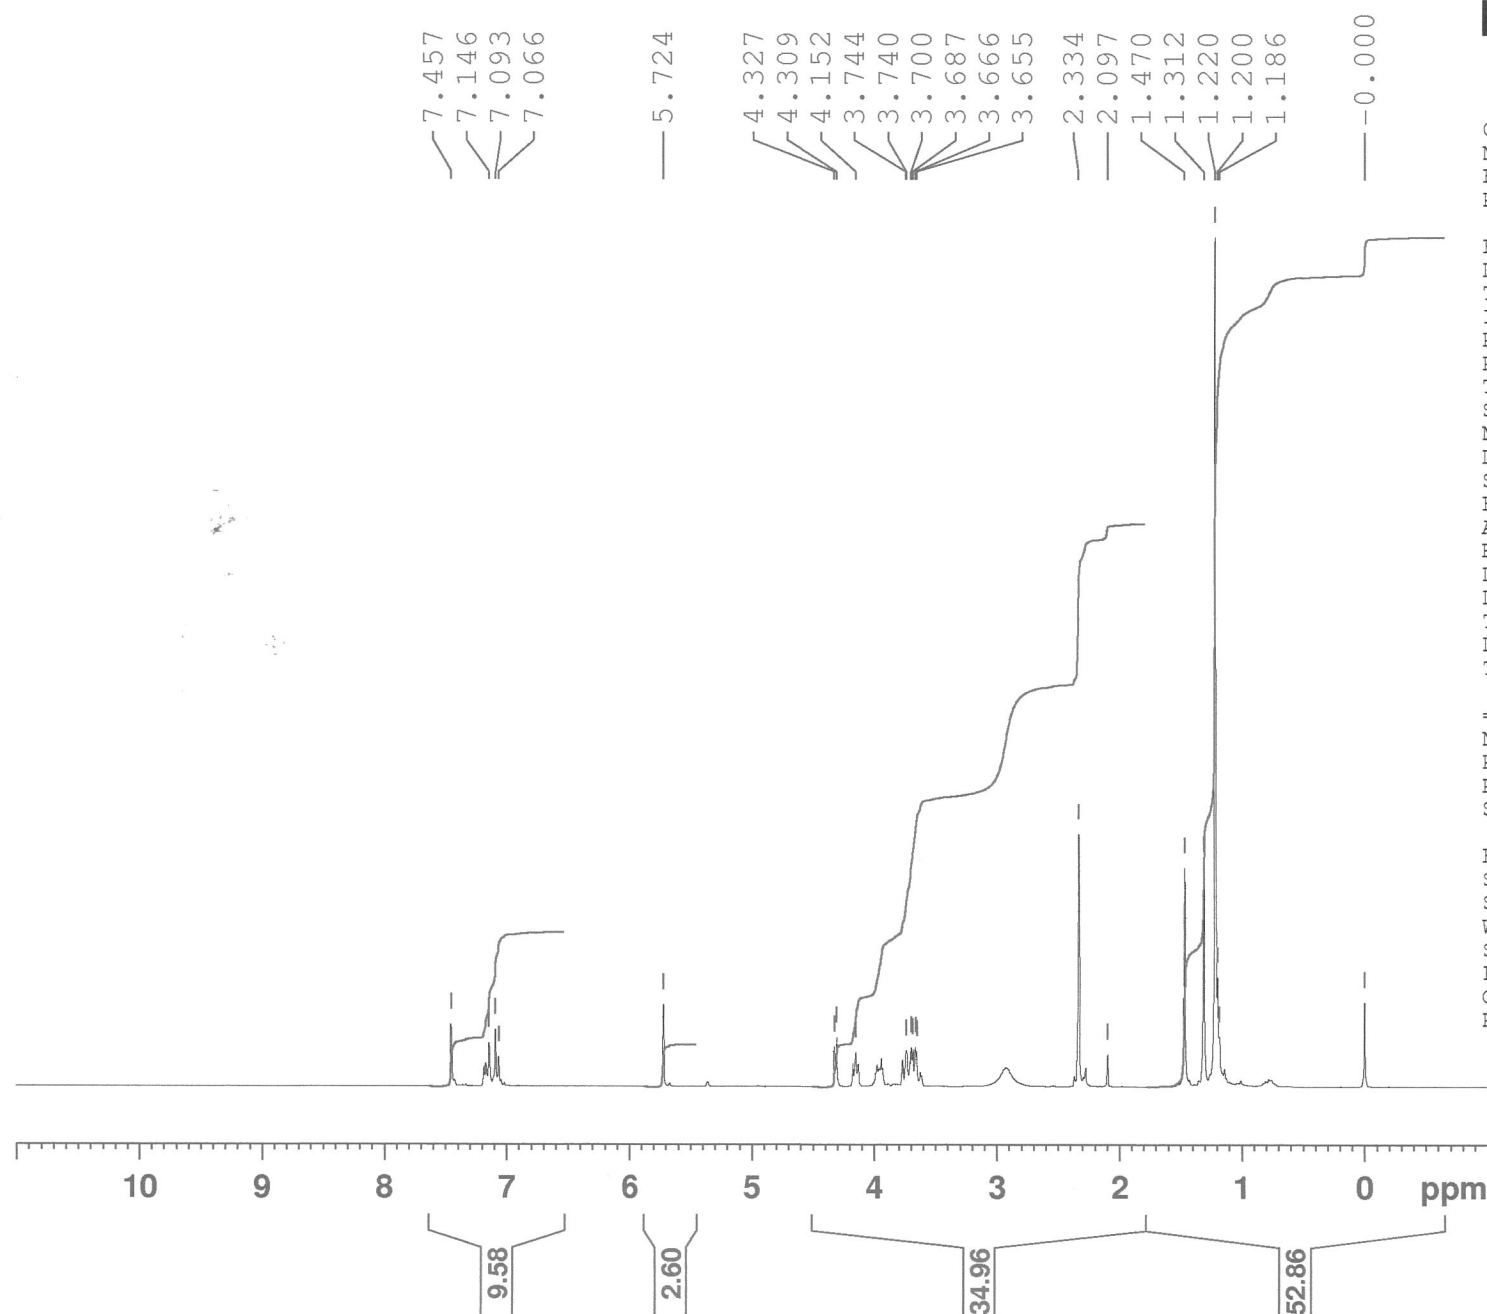

Jun06-2012-JMM  
 MP1/21

3

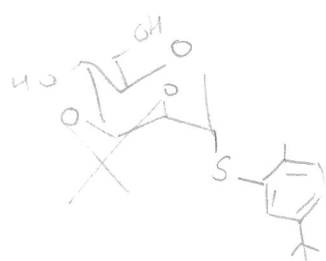

149.91, 137.08, 131.41, 130.41, 130.09, 125.40, 110.05, 83.09, 78.63, 77.65, 77.23, 76.81, 76.70, 70.84, 70.05, 62.15, 34.66, 31.50, 28.33, 26.58, 20.34

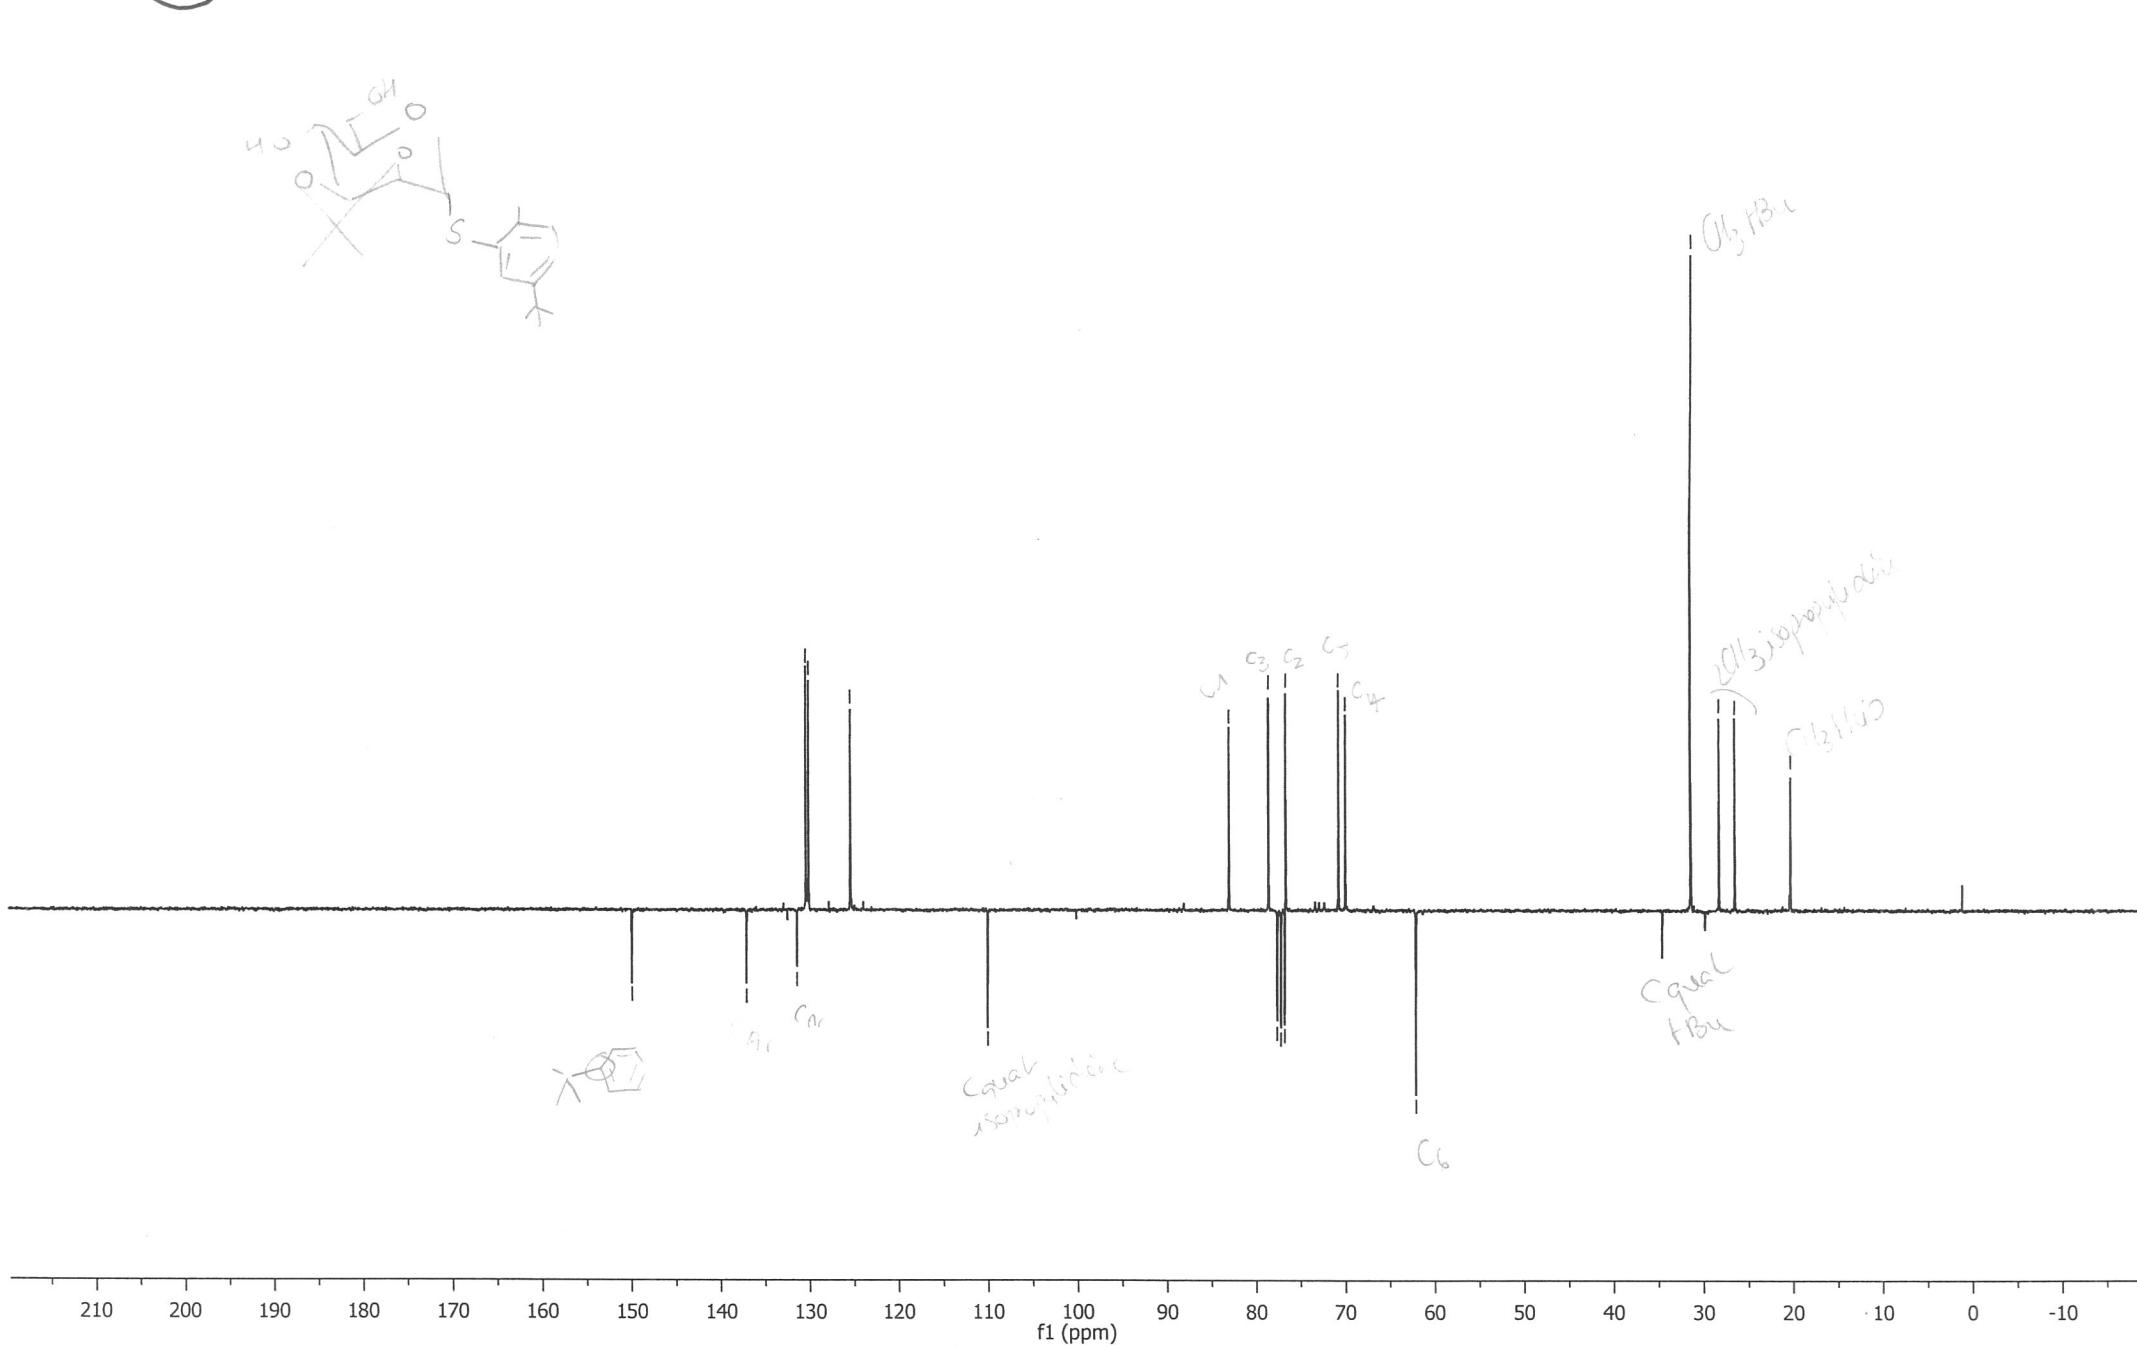

MP1/19

6

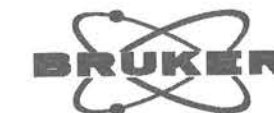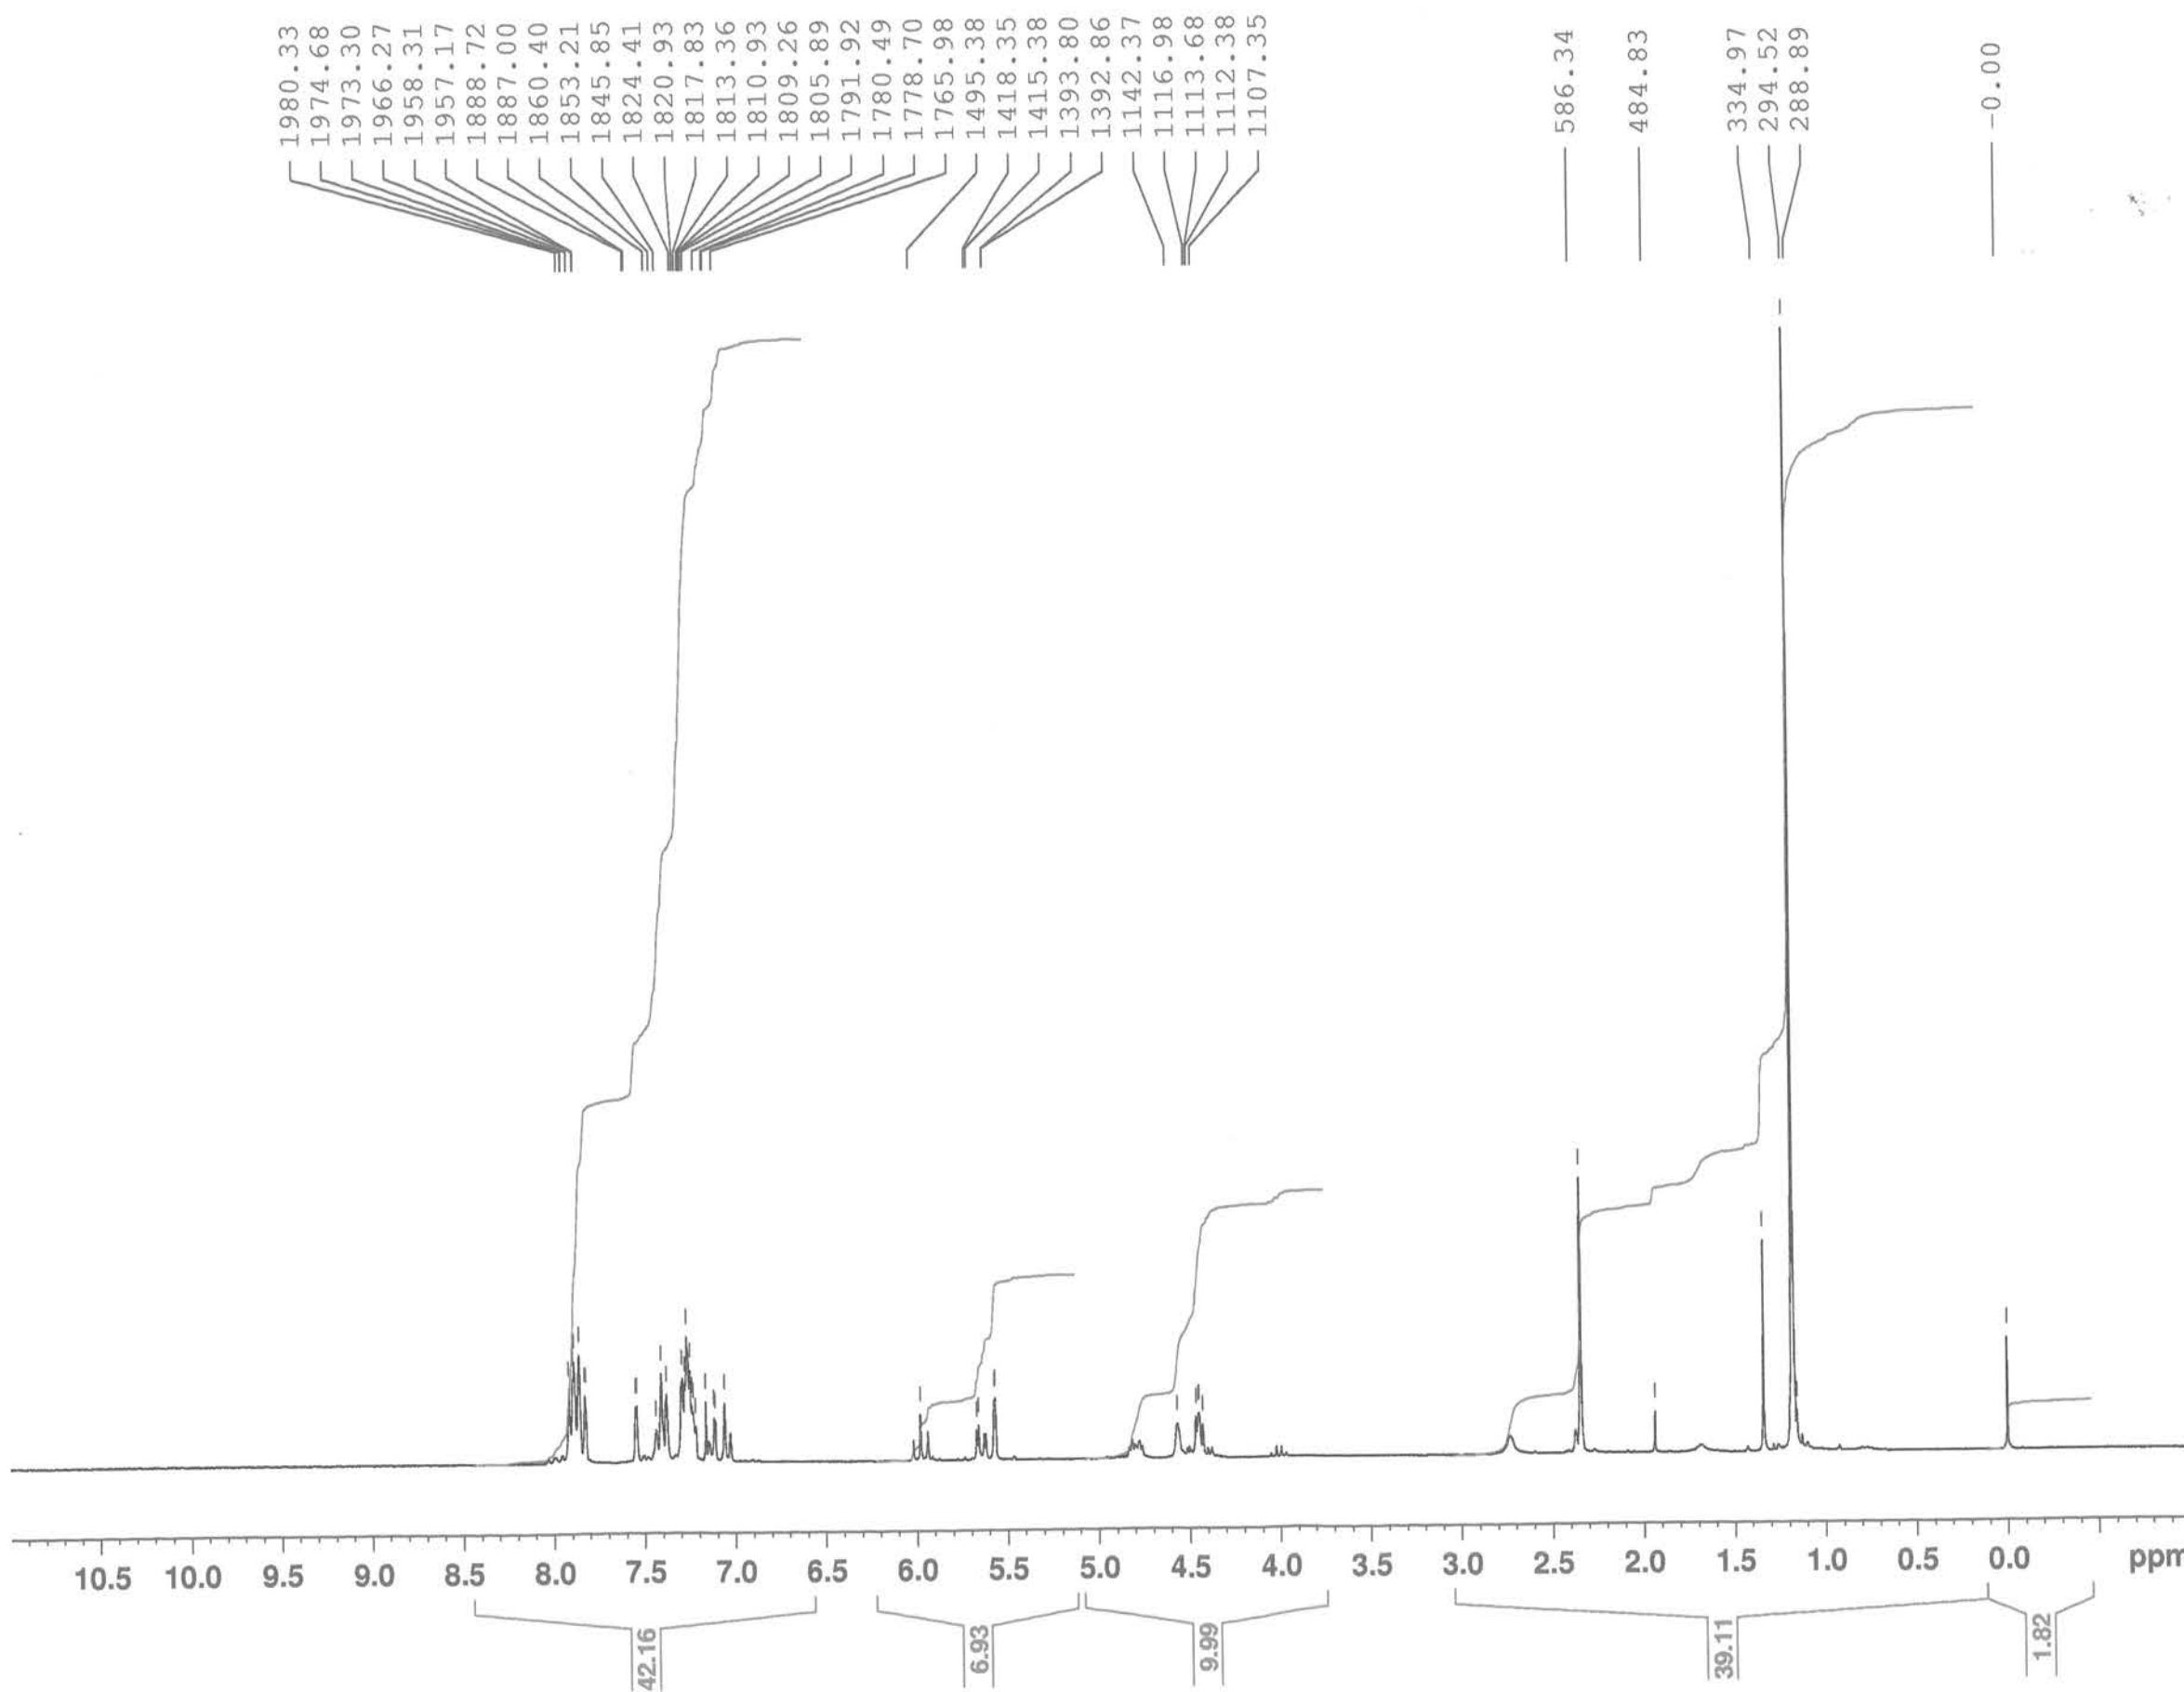

Current Data Parameters  
NAME Jun07-2011-JMM  
EXPNO 60  
PROCNO 1

F2 - Acquisition Parameters  
Date\_ 20110607  
Time 12.21  
INSTRUM spect  
PROBHD 5 mm QNP 1H/1  
PULPROG zg30  
TD 16384  
SOLVENT CDC13  
NS 64  
DS 2  
SWH 5175.983 Hz  
FIDRES 0.315917 Hz  
AQ 1.5827444 sec  
RG 228.1  
DW 96.600 usec  
DE 8.00 usec  
TE 300.0 K  
D1 0.20000000 sec  
TD0 1

==== CHANNEL f1 =====  
NUC1 1H  
P1 10.00 usec  
PL1 -3.00 dB  
SFO1 250.1315446 MHz

F2 - Processing parameters  
SI 8192  
SF 250.1300318 MHz  
WDW EM  
SSB 0  
LB 0.30 Hz  
GB 0  
PC 1.00



MP1/19

6

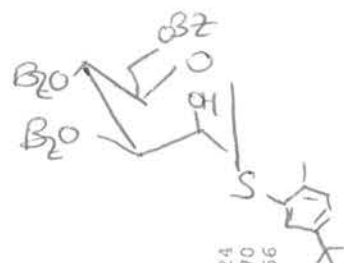

166.24  
165.70  
165.56

150.08  
136.41  
133.49  
133.41  
132.97  
132.12  
130.14  
129.87  
129.78  
129.68  
129.07  
129.01  
128.51  
128.44  
128.31  
125.08

87.69

77.58  
77.07  
76.56  
72.98  
71.23  
70.18  
67.07  
63.44

54.90

34.51

31.31

26.94

20.38

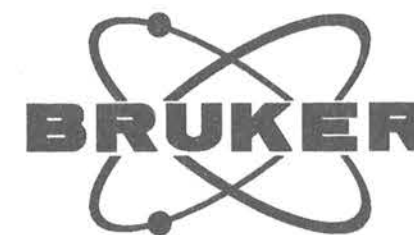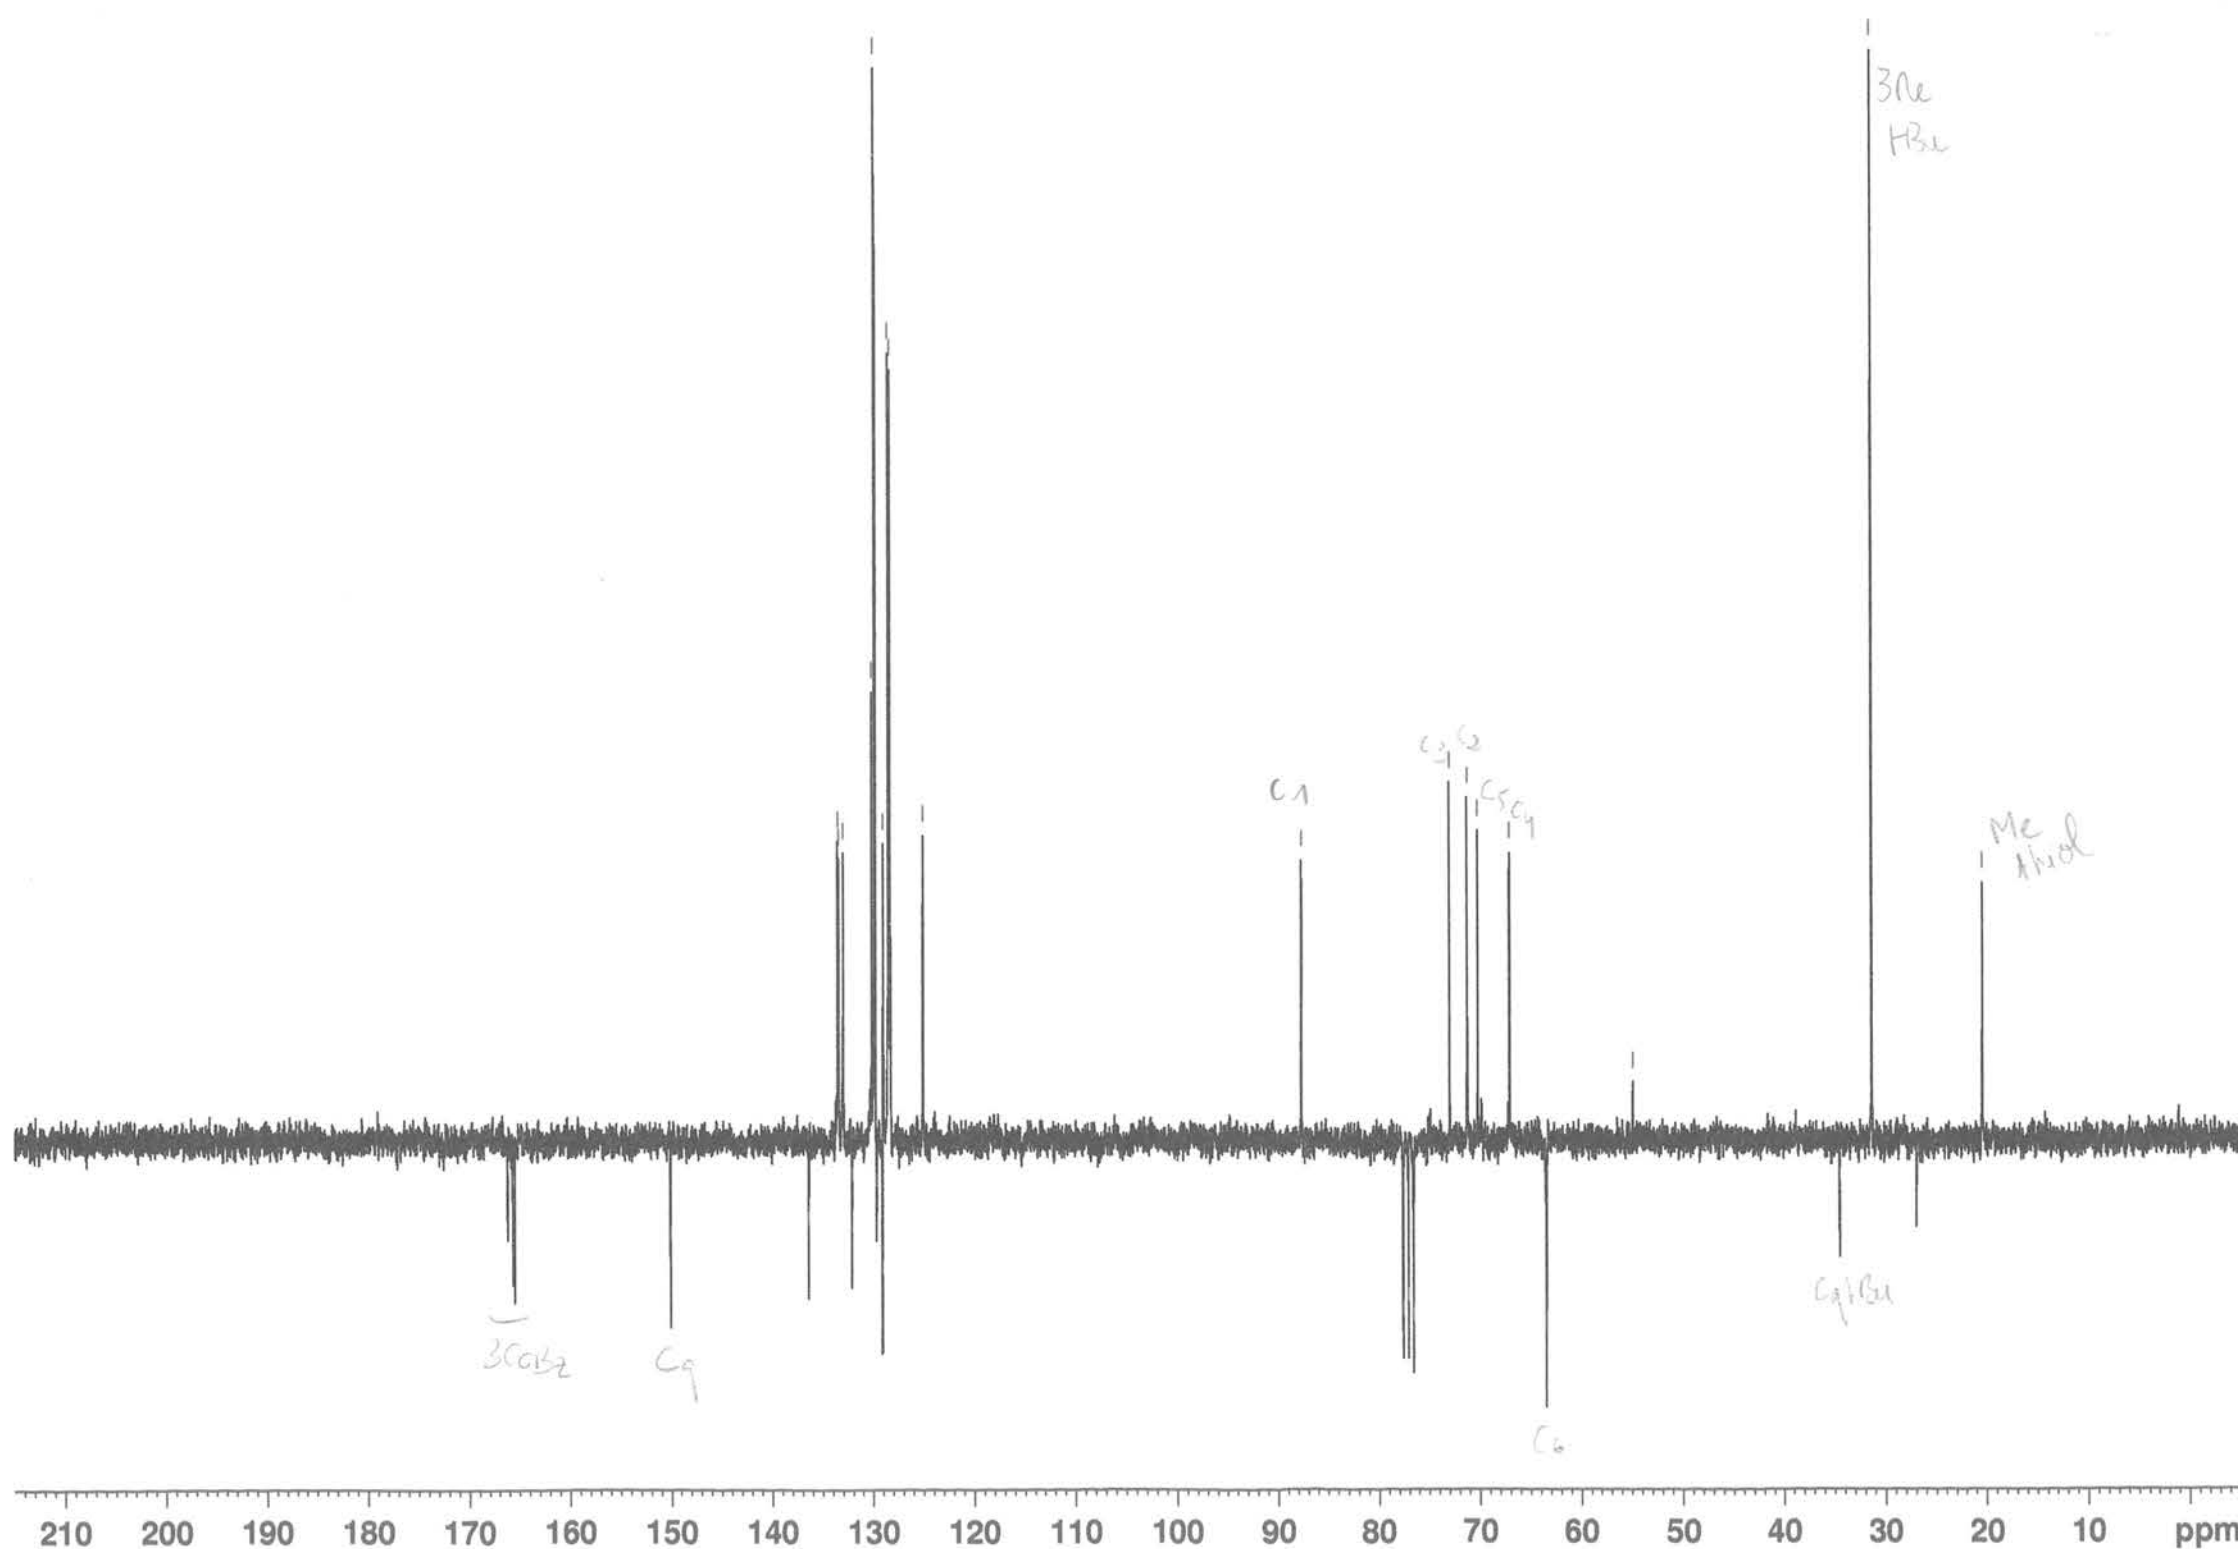

Current Data Parameters  
 NAME Jun07-2011-JMM  
 EXPNO 70  
 PROCNO 1

F2 - Acquisition Parameters  
 Date\_ 20110607  
 Time 12.40  
 INSTRUM spect  
 PROBHD 5 mm QNP 1H/1  
 PULPROG jmod  
 TD 65536  
 SOLVENT CDCl3  
 NS 256  
 DS 4  
 SWH 15060.241 Hz  
 FIDRES 0.229801 Hz  
 AQ 2.1758451 sec  
 RG 16384  
 DW 33.200 usec  
 DE 8.00 usec  
 TE 300.0 K  
 CNST2 145.000000  
 CNST11 1.000000  
 D1 2.0000000 sec  
 d20 0.00689655 sec  
 DELTA 0.00001019 sec  
 TD0 1

==== CHANNEL f1 =====  
 NUC1 13C  
 P1 8.00 usec  
 p2 16.00 usec  
 PL1 -3.00 dB  
 SFO1 62.9015280 MHz

==== CHANNEL f2 =====  
 CPDPRG2 waltz16  
 NUC2 1H  
 PCPD2 100.00 usec  
 PL2 -3.00 dB  
 PL12 19.00 dB  
 SFO2 250.1310005 MHz

F2 - Processing parameters  
 SI 32768  
 SF 62.8952390 MHz  
 WDW EM  
 SSB 0  
 LB 1.00 Hz  
 GB 0  
 PC 1.40

MP1/27

7

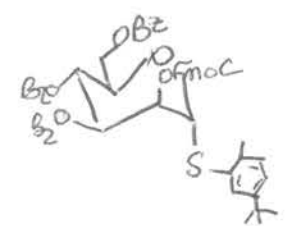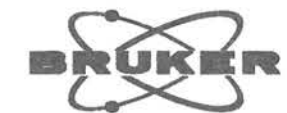

Current Data Parameters  
NAME Jun22-2011-JMM  
EXPNO 40  
PROCNO 1

F2 - Acquisition Parameters  
Date\_ 20110622  
Time 12.30  
INSTRUM spect  
PROBHD 5 mm QNP 1H/1  
PULPROG zg30  
TD 16384  
SOLVENT CDC13  
NS 64  
DS 2  
SWH 5175.983 Hz  
FIDRES 0.315917 Hz  
AQ 1.5827444 sec  
RG 161.3  
DW 96.600 usec  
DE 8.00 usec  
TE 300.0 K  
D1 0.20000000 sec  
TD0 1

==== CHANNEL f1 =====  
NUC1 1H  
P1 10.00 usec  
PL1 -3.00 dB  
SFO1 250.1315446 MHz

F2 - Processing parameters  
SI 8192  
SF 250.1300409 MHz  
WDW EM  
SSB 0  
LB 0.30 Hz  
GB 0  
PC 1.00

1994.78  
1987.41  
1985.90  
1977.91  
1959.40  
1952.13  
1921.67  
1918.92  
1914.26  
1911.48  
1888.55  
1886.62  
1883.21  
1879.56  
1872.10  
1854.56  
1846.05  
1838.53  
1833.48  
1827.29  
1819.68  
1811.61  
1807.28  
1806.35  
1804.24  
1799.96  
1793.38  
1792.52  
1785.85  
1783.04  
1775.12  
1769.39  
1761.49  
1532.77  
1450.66  
1402.72  
1400.08  
1138.34  
1135.69  
1125.82  
1054.37  
1051.31  
1045.31  
1033.66

593.04  
331.67  
296.79  
292.19  
-0.00

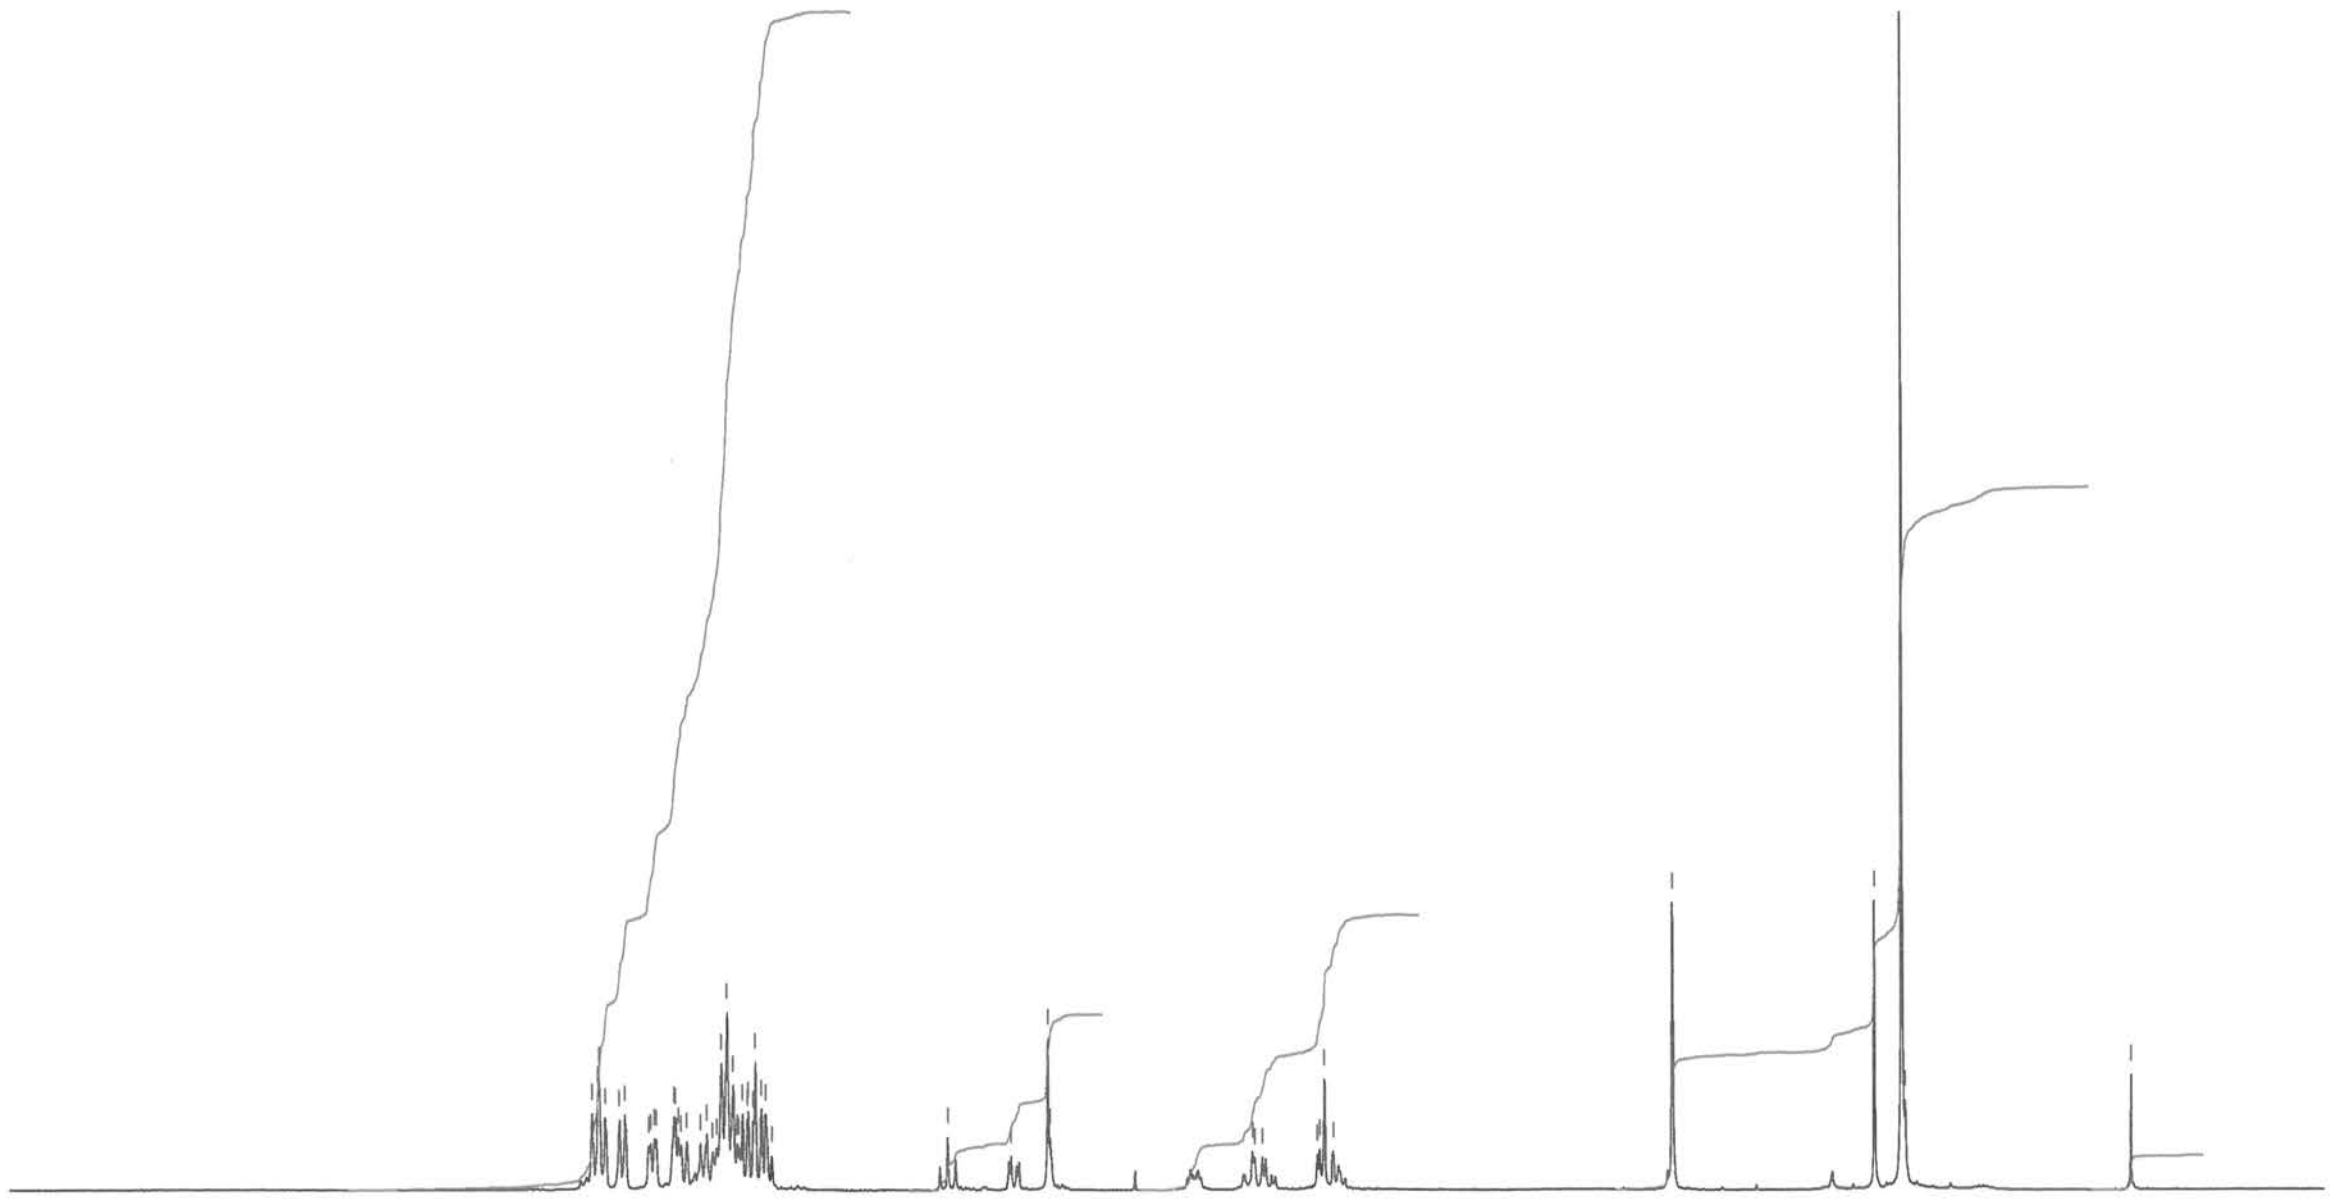

10.5 10.0 9.5 9.0 8.5 8.0 7.5 7.0 6.5 6.0 5.5 5.0 4.5 4.0 3.5 3.0 2.5 2.0 1.5 1.0 0.5 0.0 ppm

49.80

7.41

11.61

29.71

1.46

(+)

MP1/27

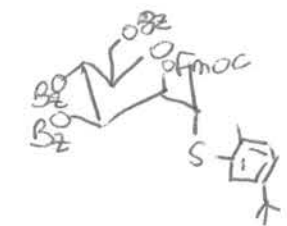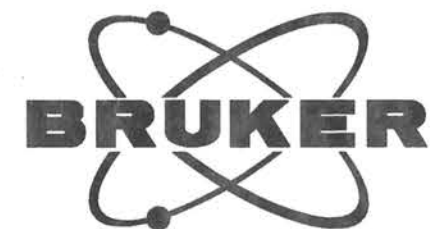

165.16  
164.43  
164.27  
153.31  
149.10  
142.21  
141.97  
140.18  
136.01  
132.42  
132.34  
131.97  
130.51  
129.24  
129.00  
128.85  
128.76  
128.68  
127.94  
127.82  
127.42  
127.31  
126.92  
126.35  
126.25  
124.61  
124.23  
118.99

84.69  
76.52  
76.01  
75.51  
74.33  
69.54  
69.37  
69.25  
65.80  
62.16

45.45

33.45

30.25

25.88

19.44

0.00

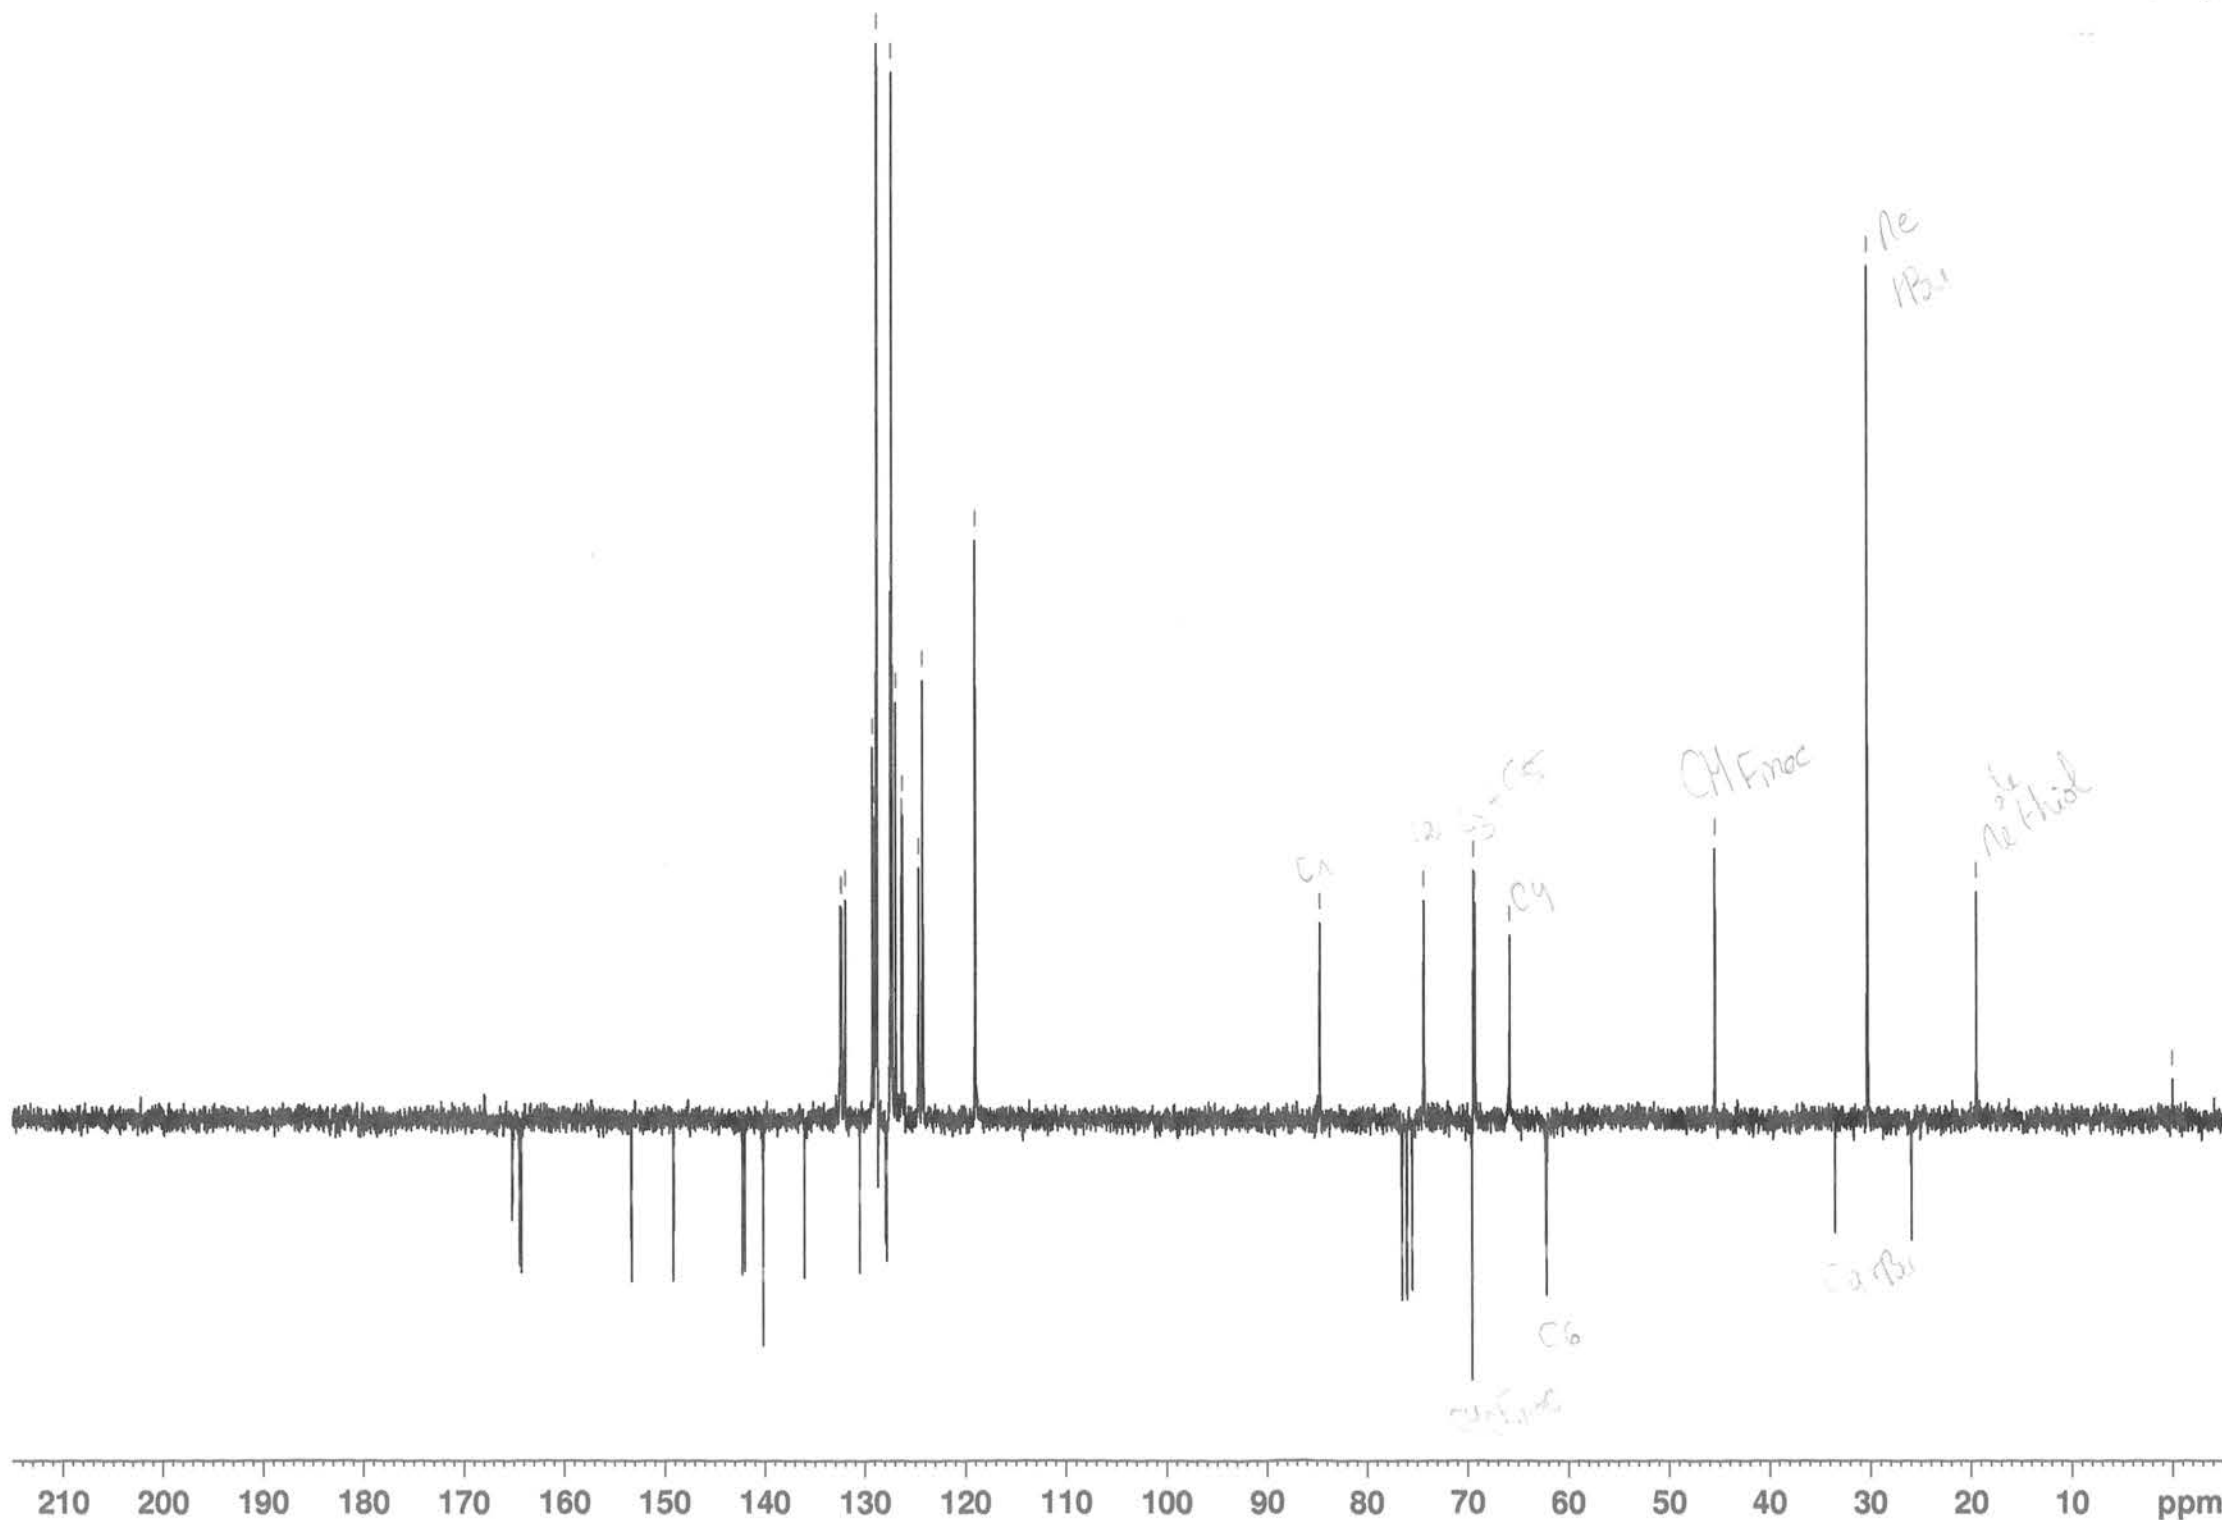

Current Data Parameters  
 NAME Jun22-2011-JMM  
 EXPNO 41  
 PROCNO 1

F2 - Acquisition Parameters  
 Date\_ 20110622  
 Time 12.49  
 INSTRUM spect  
 PROBHD 5 mm QNP 1H/1  
 PULPROG jmod  
 TD 65536  
 SOLVENT CDCl3  
 NS 256  
 DS 4  
 SWH 15060.241 Hz  
 FIDRES 0.229801 Hz  
 AQ 2.1758451 sec  
 RG 16384  
 DW 33.200 usec  
 DE 8.00 usec  
 TE 300.0 K  
 CNST2 145.000000  
 CNST11 1.000000  
 D1 2.0000000 sec  
 d20 0.00689655 sec  
 DELTA 0.00001019 sec  
 TD0 1

==== CHANNEL f1 =====  
 NUC1 13C  
 P1 8.00 usec  
 p2 16.00 usec  
 PL1 -3.00 dB  
 SFO1 62.9015280 MHz

==== CHANNEL f2 =====  
 CPDPRG2 waltz16  
 NUC2 1H  
 PCPD2 100.00 usec  
 PL2 -3.00 dB  
 PL12 19.00 dB  
 SFO2 250.1310005 MHz

F2 - Processing parameters  
 SI 32768  
 SF 62.8953078 MHz  
 WDW EM  
 SSB 0  
 LB 1.00 Hz  
 GB 0  
 PC 1.40



MP1/17

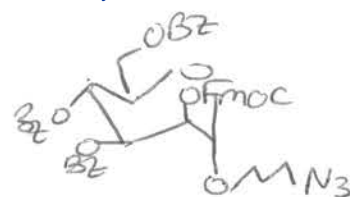

8

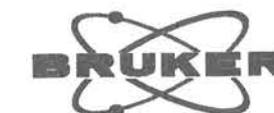

2010.80  
2003.67  
2002.09  
1980.53  
1973.36  
1952.81  
1945.64  
1944.61  
1926.08  
1918.60  
1892.90  
1885.51  
1878.11  
1863.54  
1856.25  
1848.95  
1839.17  
1832.37  
1827.82  
1824.96  
1820.08  
1814.00  
1813.04  
1806.53  
1798.99  
1790.82  
1780.17  
1772.47  
1764.83  
1501.03  
1490.97  
1440.79  
1437.53  
1430.67  
1427.42  
1324.55  
1322.86  
1321.50  
1319.70  
1252.19  
1250.80  
1144.02  
1141.36  
1123.09  
1117.94  
1055.74  
1053.38  
1047.04  
1037.04  
963.21  
891.63  
856.33  
854.24  
852.44  
849.87  
843.32  
672.48  
628.29  
588.64  
488.11  
475.72  
469.39  
463.12  
334.34  
314.80  
298.35  
293.81  
291.46  
0.00

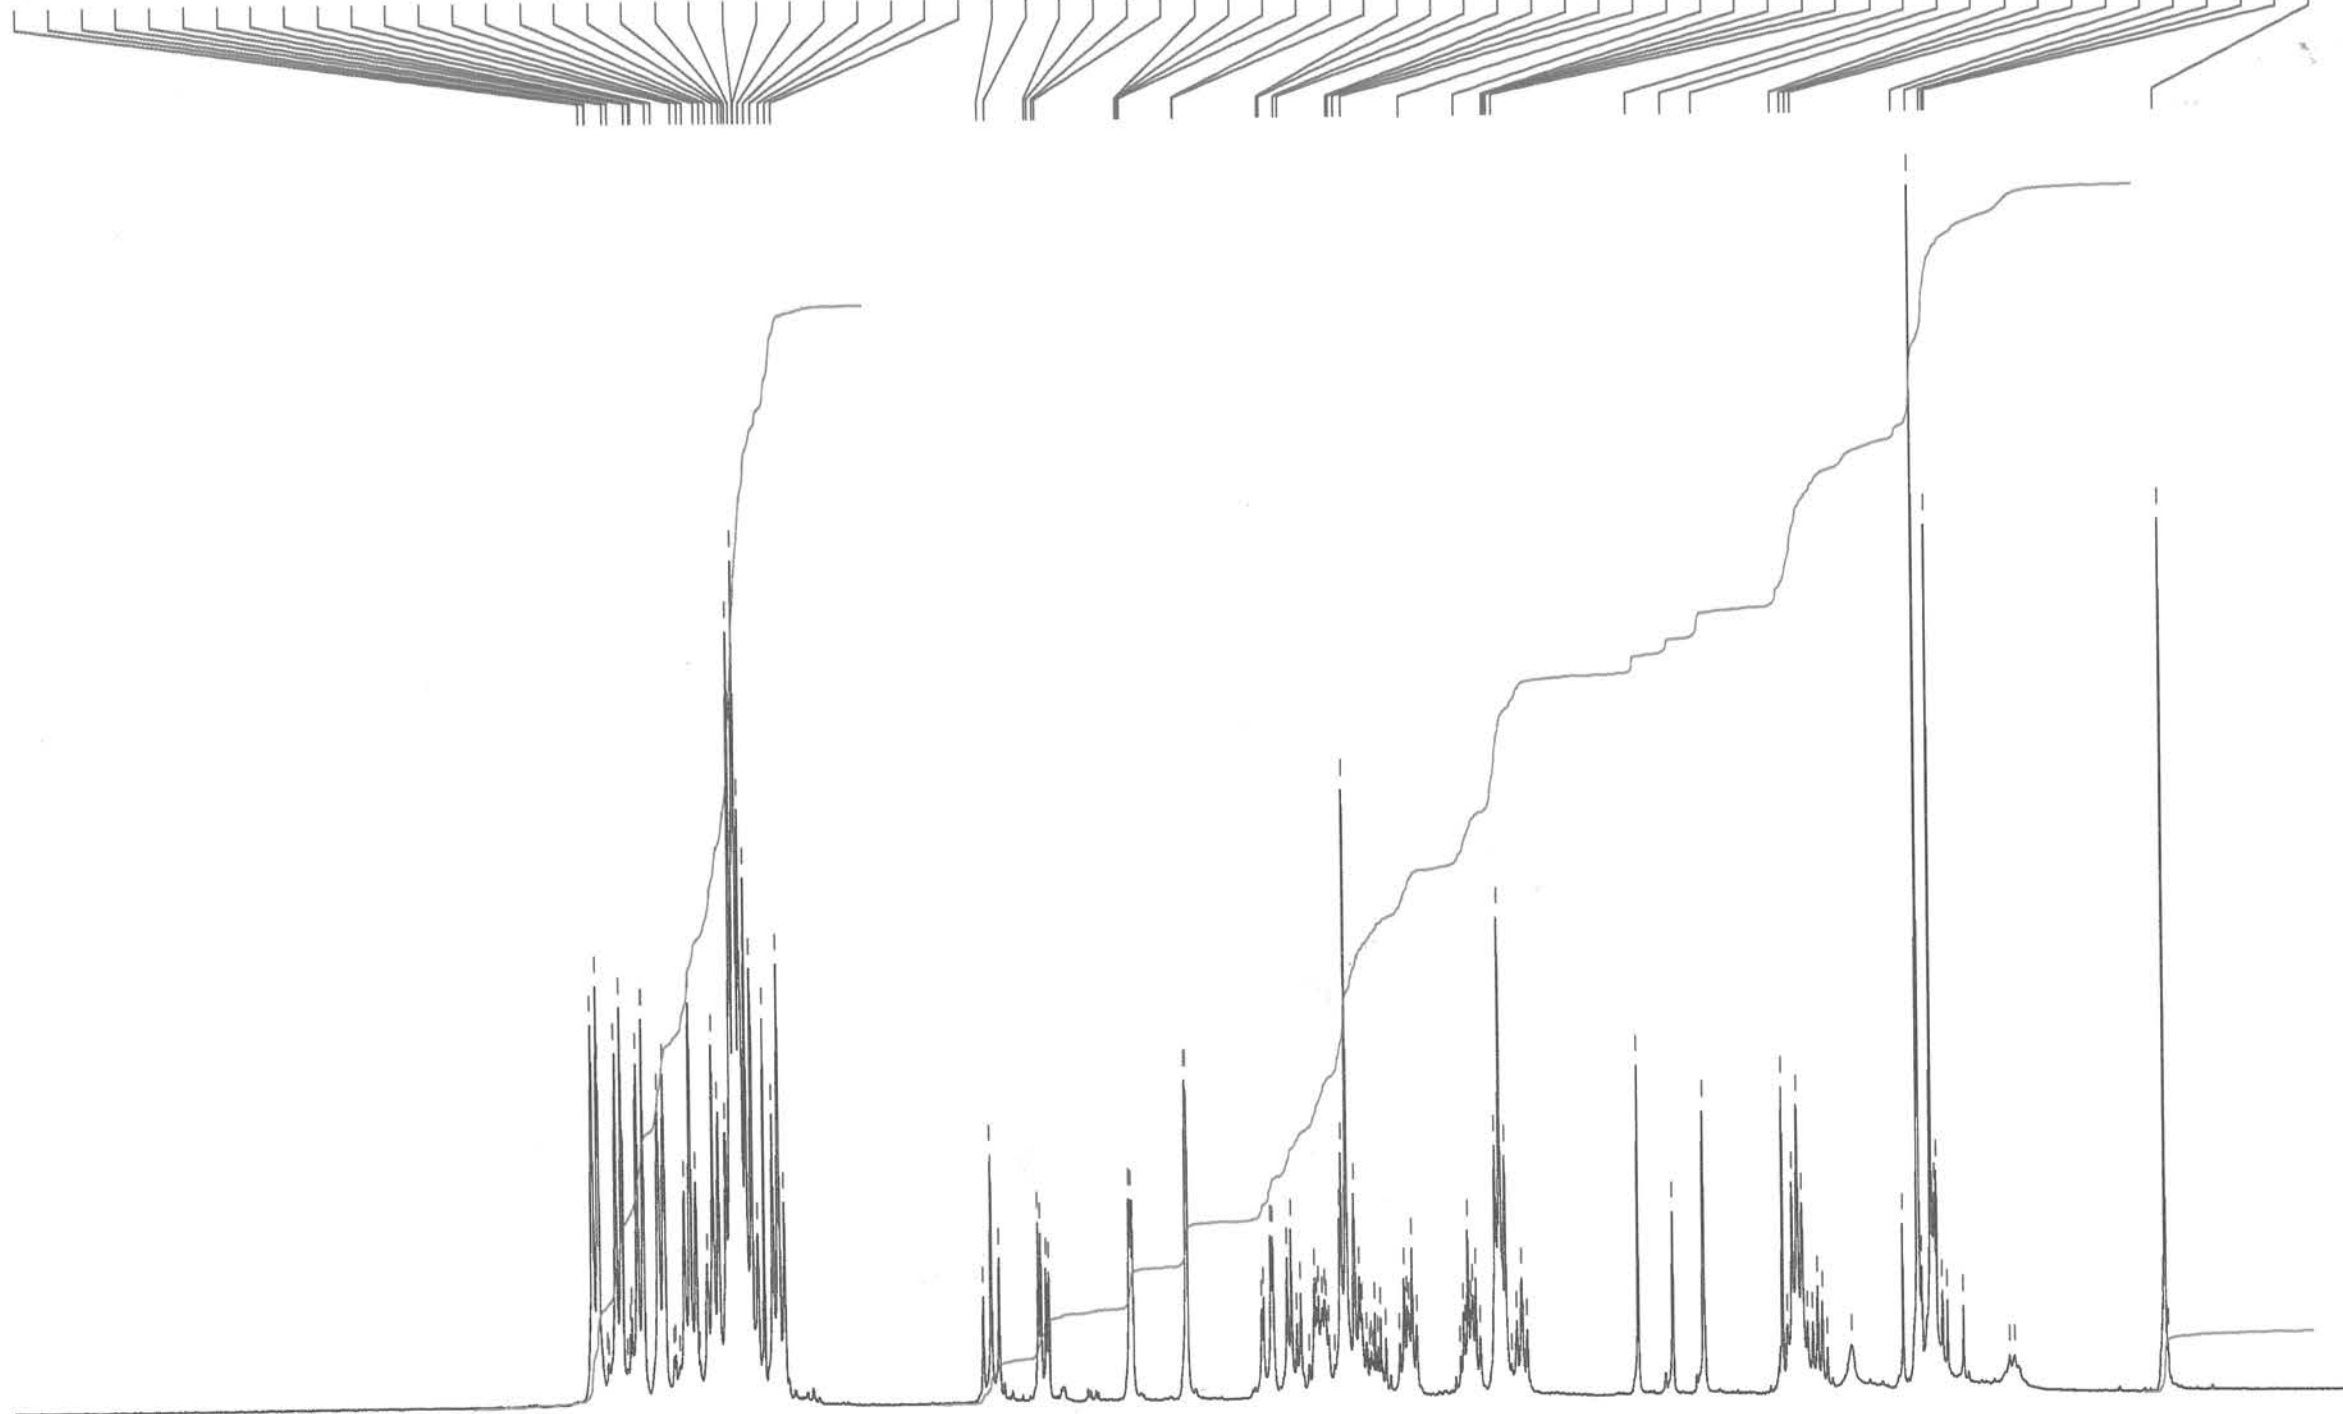

10.5 10.0 9.5 9.0 8.5 8.0 7.5 7.0 6.5 6.0 5.5 5.0 4.5 4.0 3.5 3.0 2.5 2.0 1.5 1.0 0.5 0.0 ppm

46.47

51.03

2.49

Current Data Parameters  
NAME May27-2011-JMM  
EXPNO 40  
PROCNO 1

F2 - Acquisition Parameters  
Date\_ 20110527  
Time 12.16  
INSTRUM spect  
PROBHD 5 mm QNP 1H/1  
PULPROG zg30  
TD 16384  
SOLVENT CDC13  
NS 64  
DS 2  
SWH 5175.983 Hz  
FIDRES 0.315917 Hz  
AQ 1.5827444 sec  
RG 203.2  
DW 96.600 usec  
DE 8.00 usec  
TE 300.0 K  
D1 0.20000000 sec  
TD0 1

==== CHANNEL f1 =====  
NUC1 1H  
P1 10.00 usec  
PL1 -3.00 dB  
SFO1 250.1315446 MHz

F2 - Processing parameters  
SI 8192  
SF 250.1300330 MHz  
WDW EM  
SSB 0  
LB 0.30 Hz  
GB 0  
PC 1.00

MP1/17

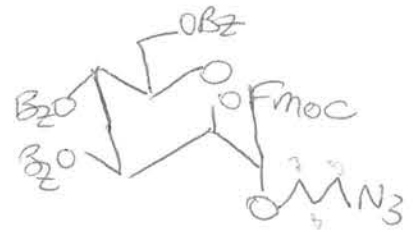

8

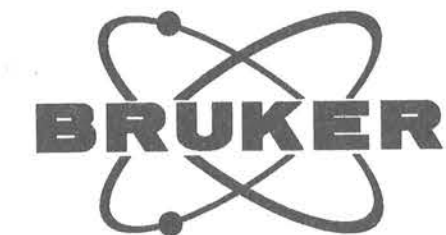

165.17  
164.45  
164.34  
153.40  
142.23  
142.00  
140.20  
132.56  
132.40  
132.26  
132.08  
130.62  
130.03  
129.41  
128.82  
128.72  
128.69  
128.22  
127.94  
127.92  
127.57  
127.39  
127.27  
126.93  
126.36  
126.27  
126.15  
124.25  
124.15  
119.99  
119.01  
96.45

76.54  
76.03  
75.52  
72.31  
69.54  
68.95  
68.03  
66.51  
65.77  
64.10  
62.26  
60.30  
54.20  
47.43  
47.17  
46.81  
45.45

30.21  
30.15  
28.24  
28.12  
27.69  
27.55

16.39

-0.00

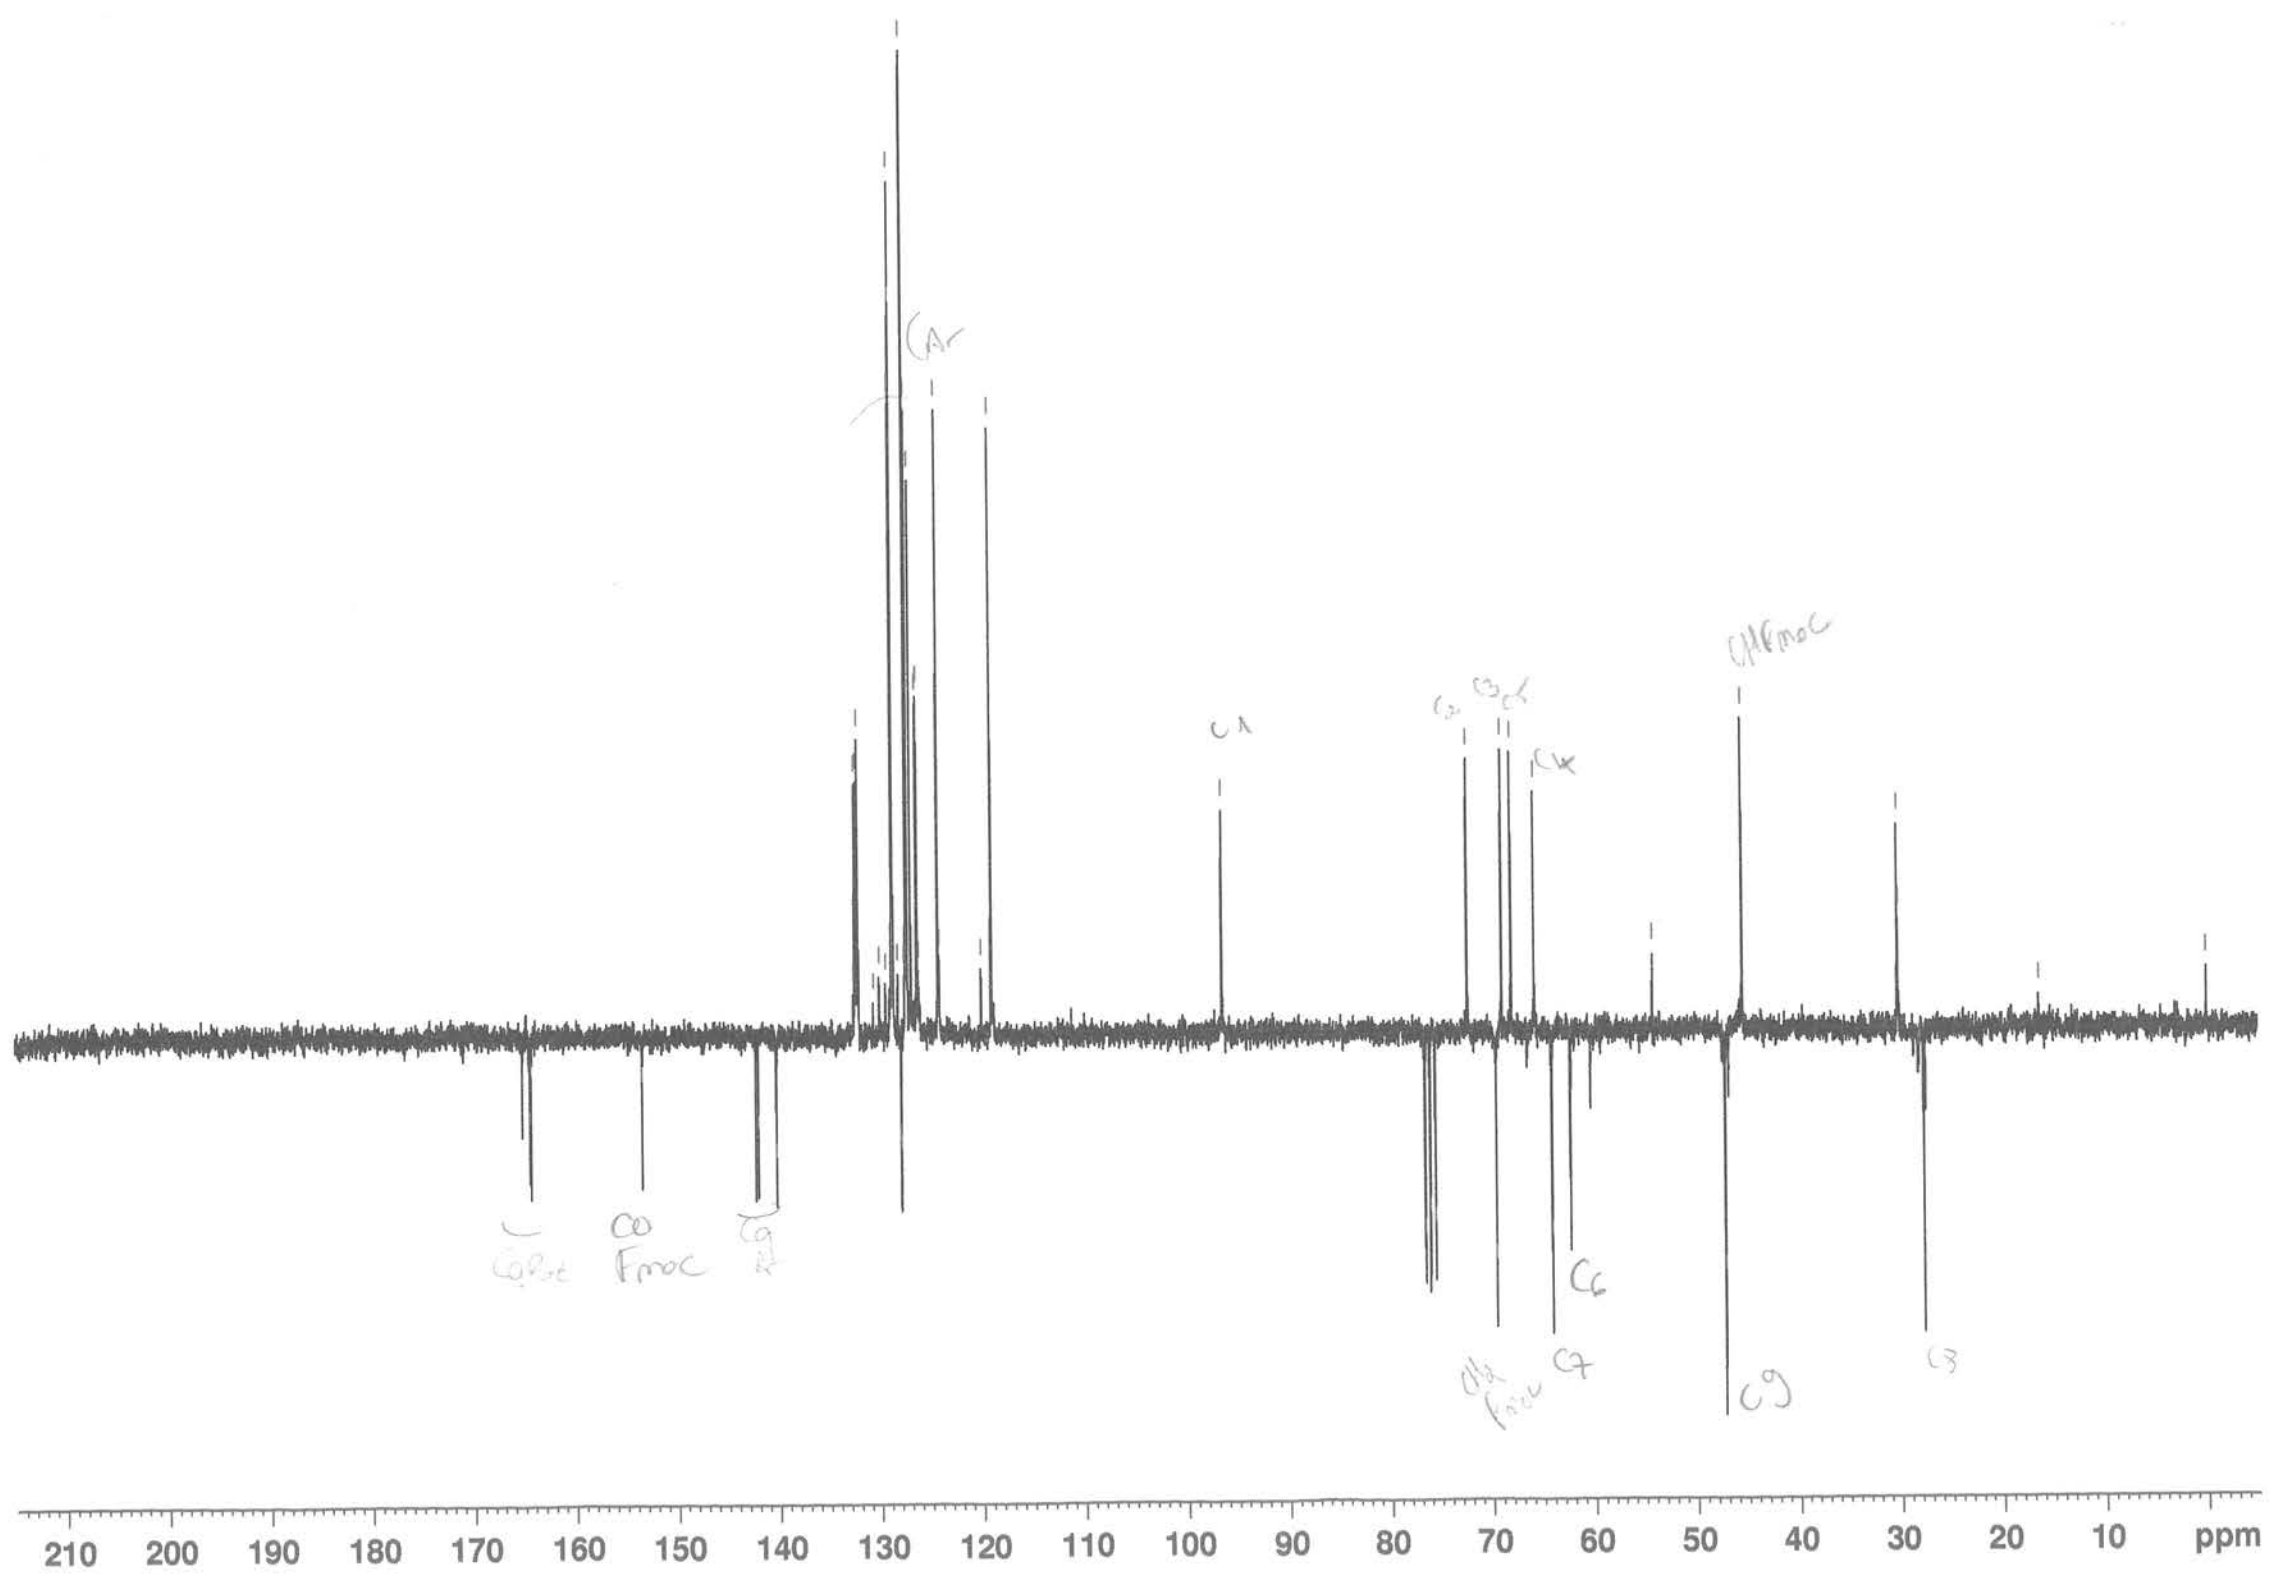

Current Data Parameters  
 NAME May27-2011-JMM  
 EXPNO 41  
 PROCNO 1

F2 - Acquisition Parameters  
 Date\_ 20110527  
 Time 12.53  
 INSTRUM spect  
 PROBHD 5 mm QNP 1H/1  
 PULPROG jmod  
 TD 65536  
 SOLVENT CDC13  
 NS 512  
 DS 4  
 SWH 15060.241 Hz  
 FIDRES 0.229801 Hz  
 AQ 2.1758451 sec  
 RG 16384  
 DW 33.200 usec  
 DE 8.00 usec  
 TE 300.0 K  
 CNST2 145.000000  
 CNST11 1.000000  
 D1 2.0000000 sec  
 d20 0.00689655 sec  
 DELTA 0.00001019 sec  
 TD0 1

==== CHANNEL f1 =====  
 NUC1 13C  
 P1 8.00 usec  
 p2 16.00 usec  
 PL1 -3.00 dB  
 SFO1 62.9015280 MHz

==== CHANNEL f2 =====  
 CPDPRG2 waltz16  
 NUC2 1H  
 PCPD2 100.00 usec  
 PL2 -3.00 dB  
 PL12 19.00 dB  
 SFO2 250.1310005 MHz

F2 - Processing parameters  
 SI 32768  
 SF 62.8953060 MHz  
 WDW EM  
 SSB 0  
 LB 1.00 Hz  
 GB 0  
 PC 1.40



MP1/23C

9a

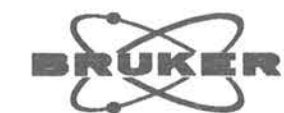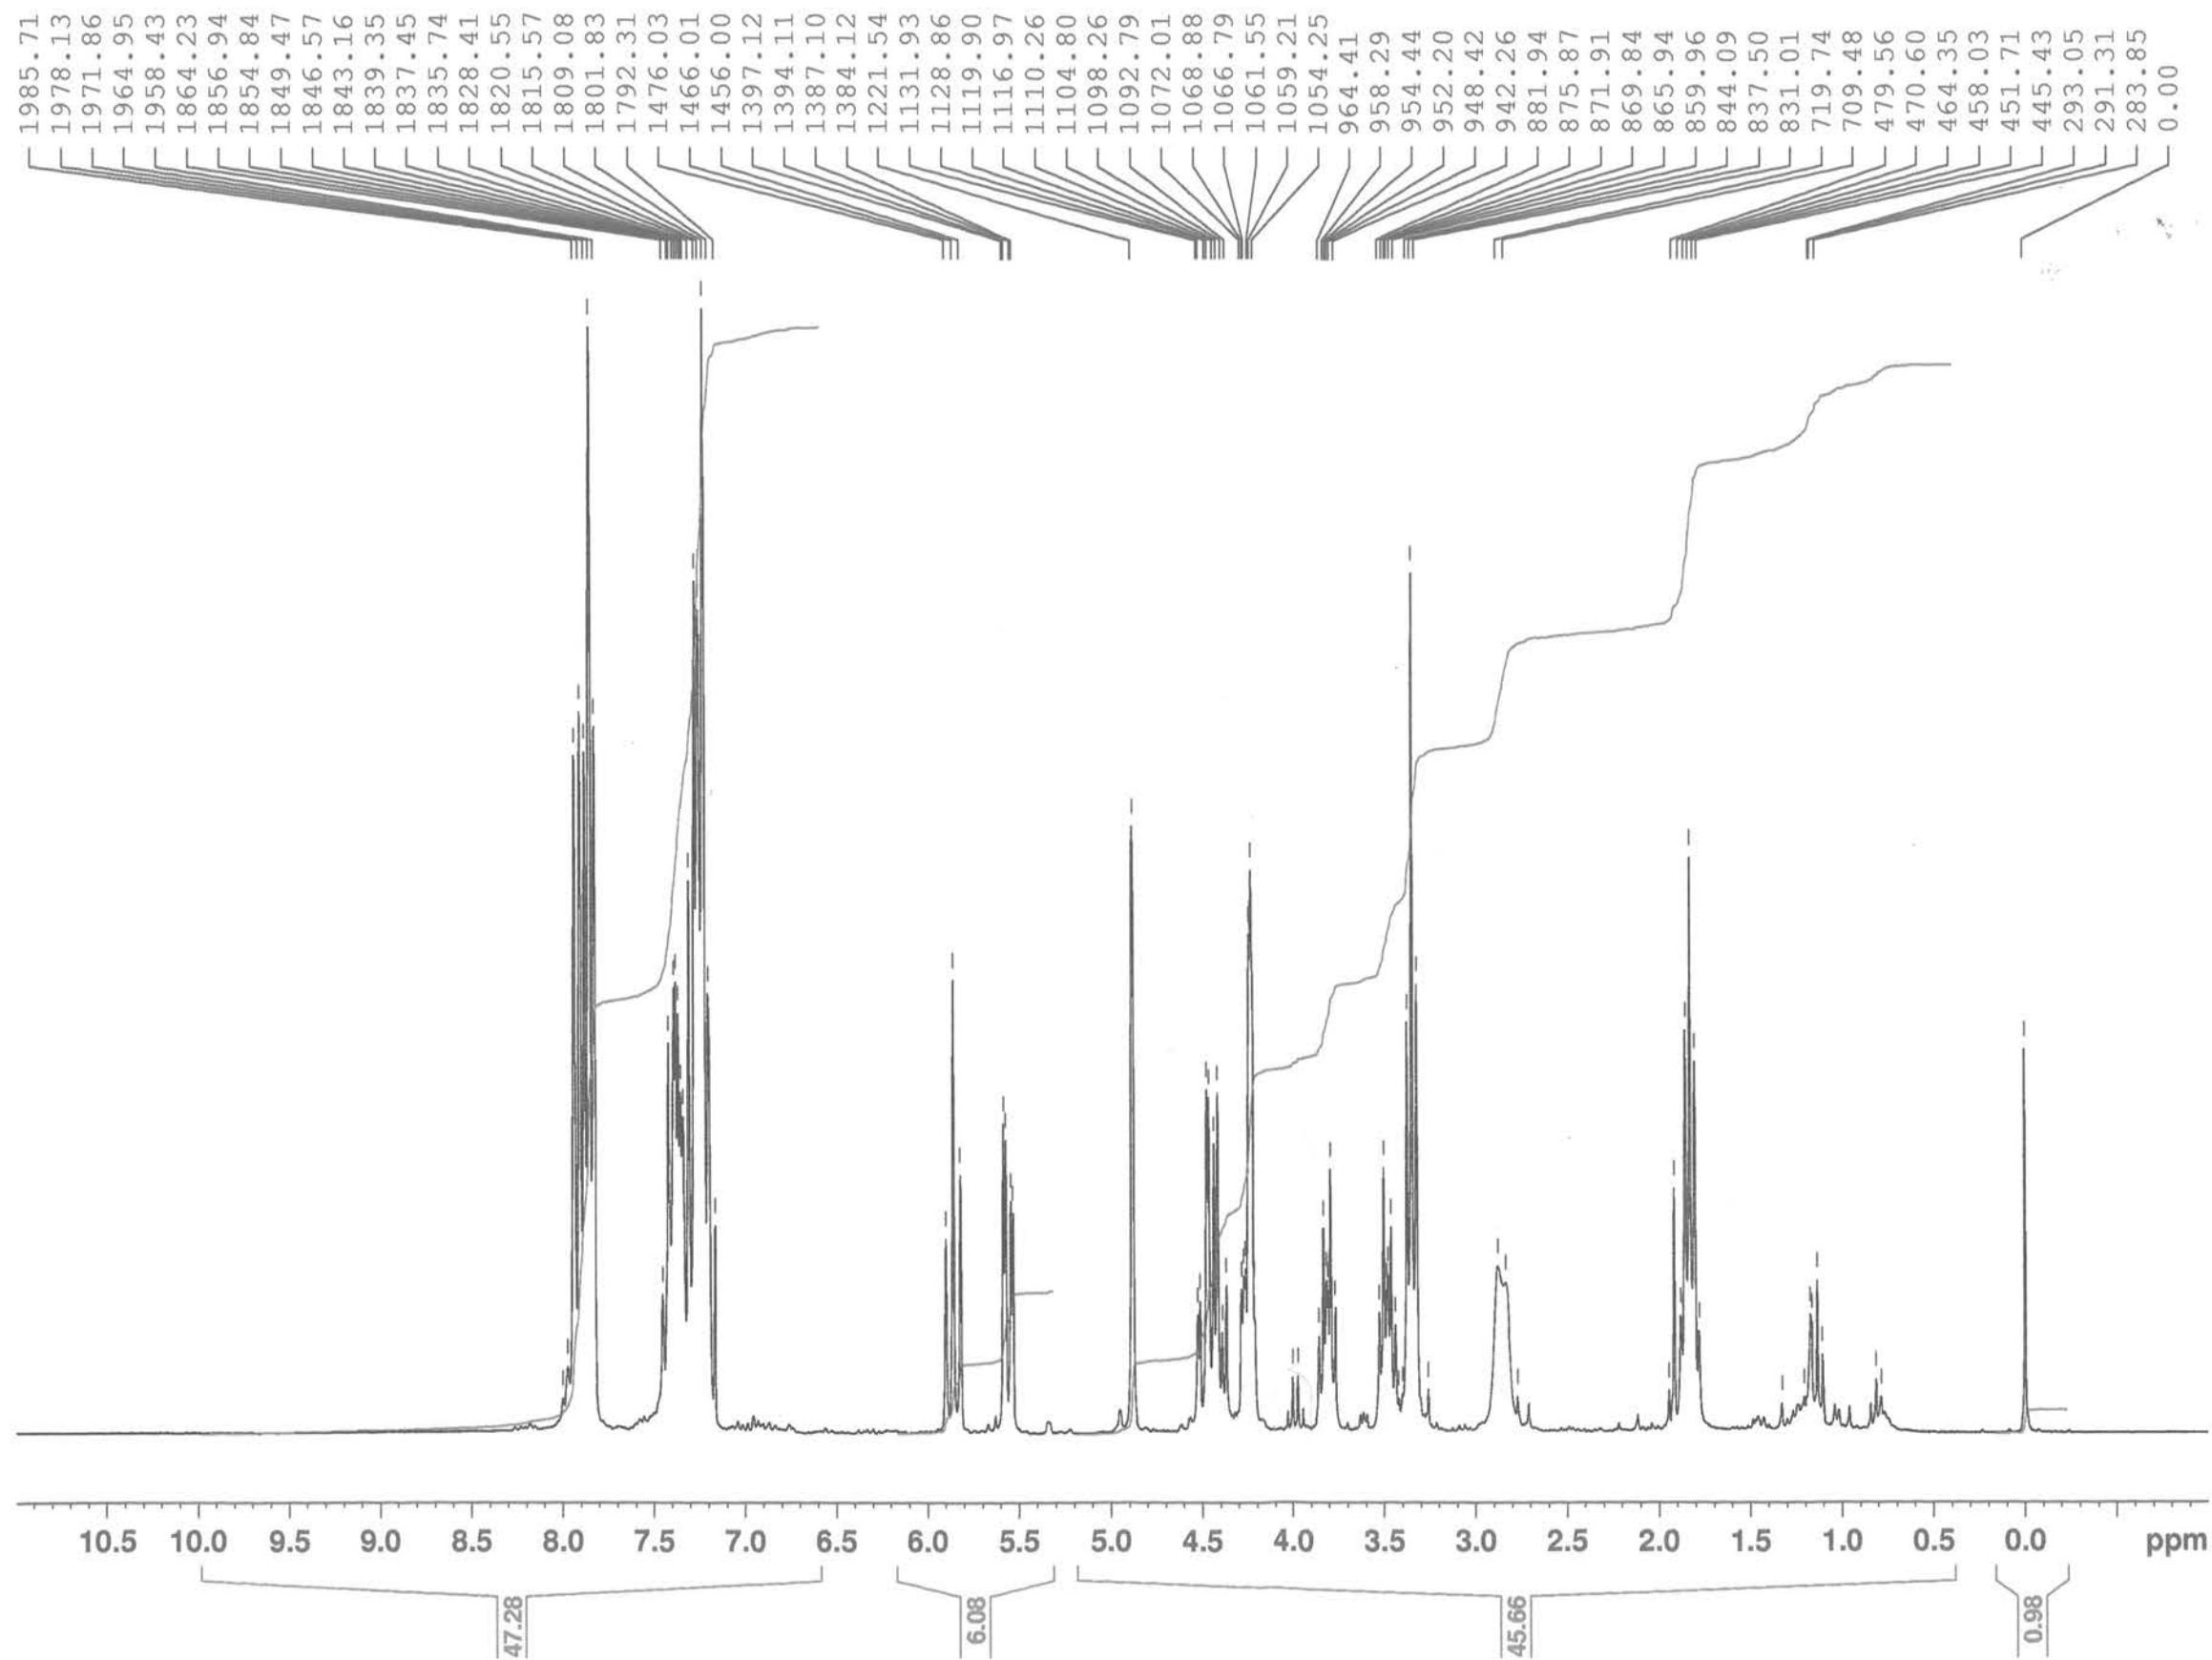

Current Data Parameters  
NAME Jun16-2011-JMM  
EXPNO 30  
PROCNO 1

F2 - Acquisition Parameters  
Date\_ 20110616  
Time 11.54  
INSTRUM spect  
PROBHD 5 mm QNP 1H/1  
PULPROG zg30  
TD 16384  
SOLVENT CDCl3  
NS 64  
DS 2  
SWH 5175.983 Hz  
FIDRES 0.315917 Hz  
AQ 1.5827444 sec  
RG 203.2  
DW 96.600 usec  
DE 8.00 usec  
TE 300.0 K  
D1 0.20000000 sec  
TD0 1

==== CHANNEL f1 =====  
NUC1 1H  
P1 10.00 usec  
PL1 -3.00 dB  
SFO1 250.1315446 MHz

F2 - Processing parameters  
SI 8192  
SF 250.1300312 MHz  
WDW EM  
SSB 0  
LB 0.30 Hz  
GB 0  
PC 1.00

MP1/23C

9a

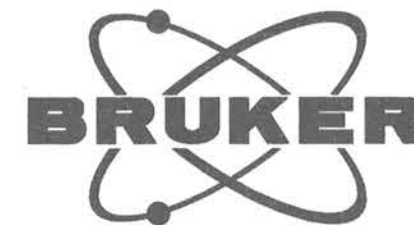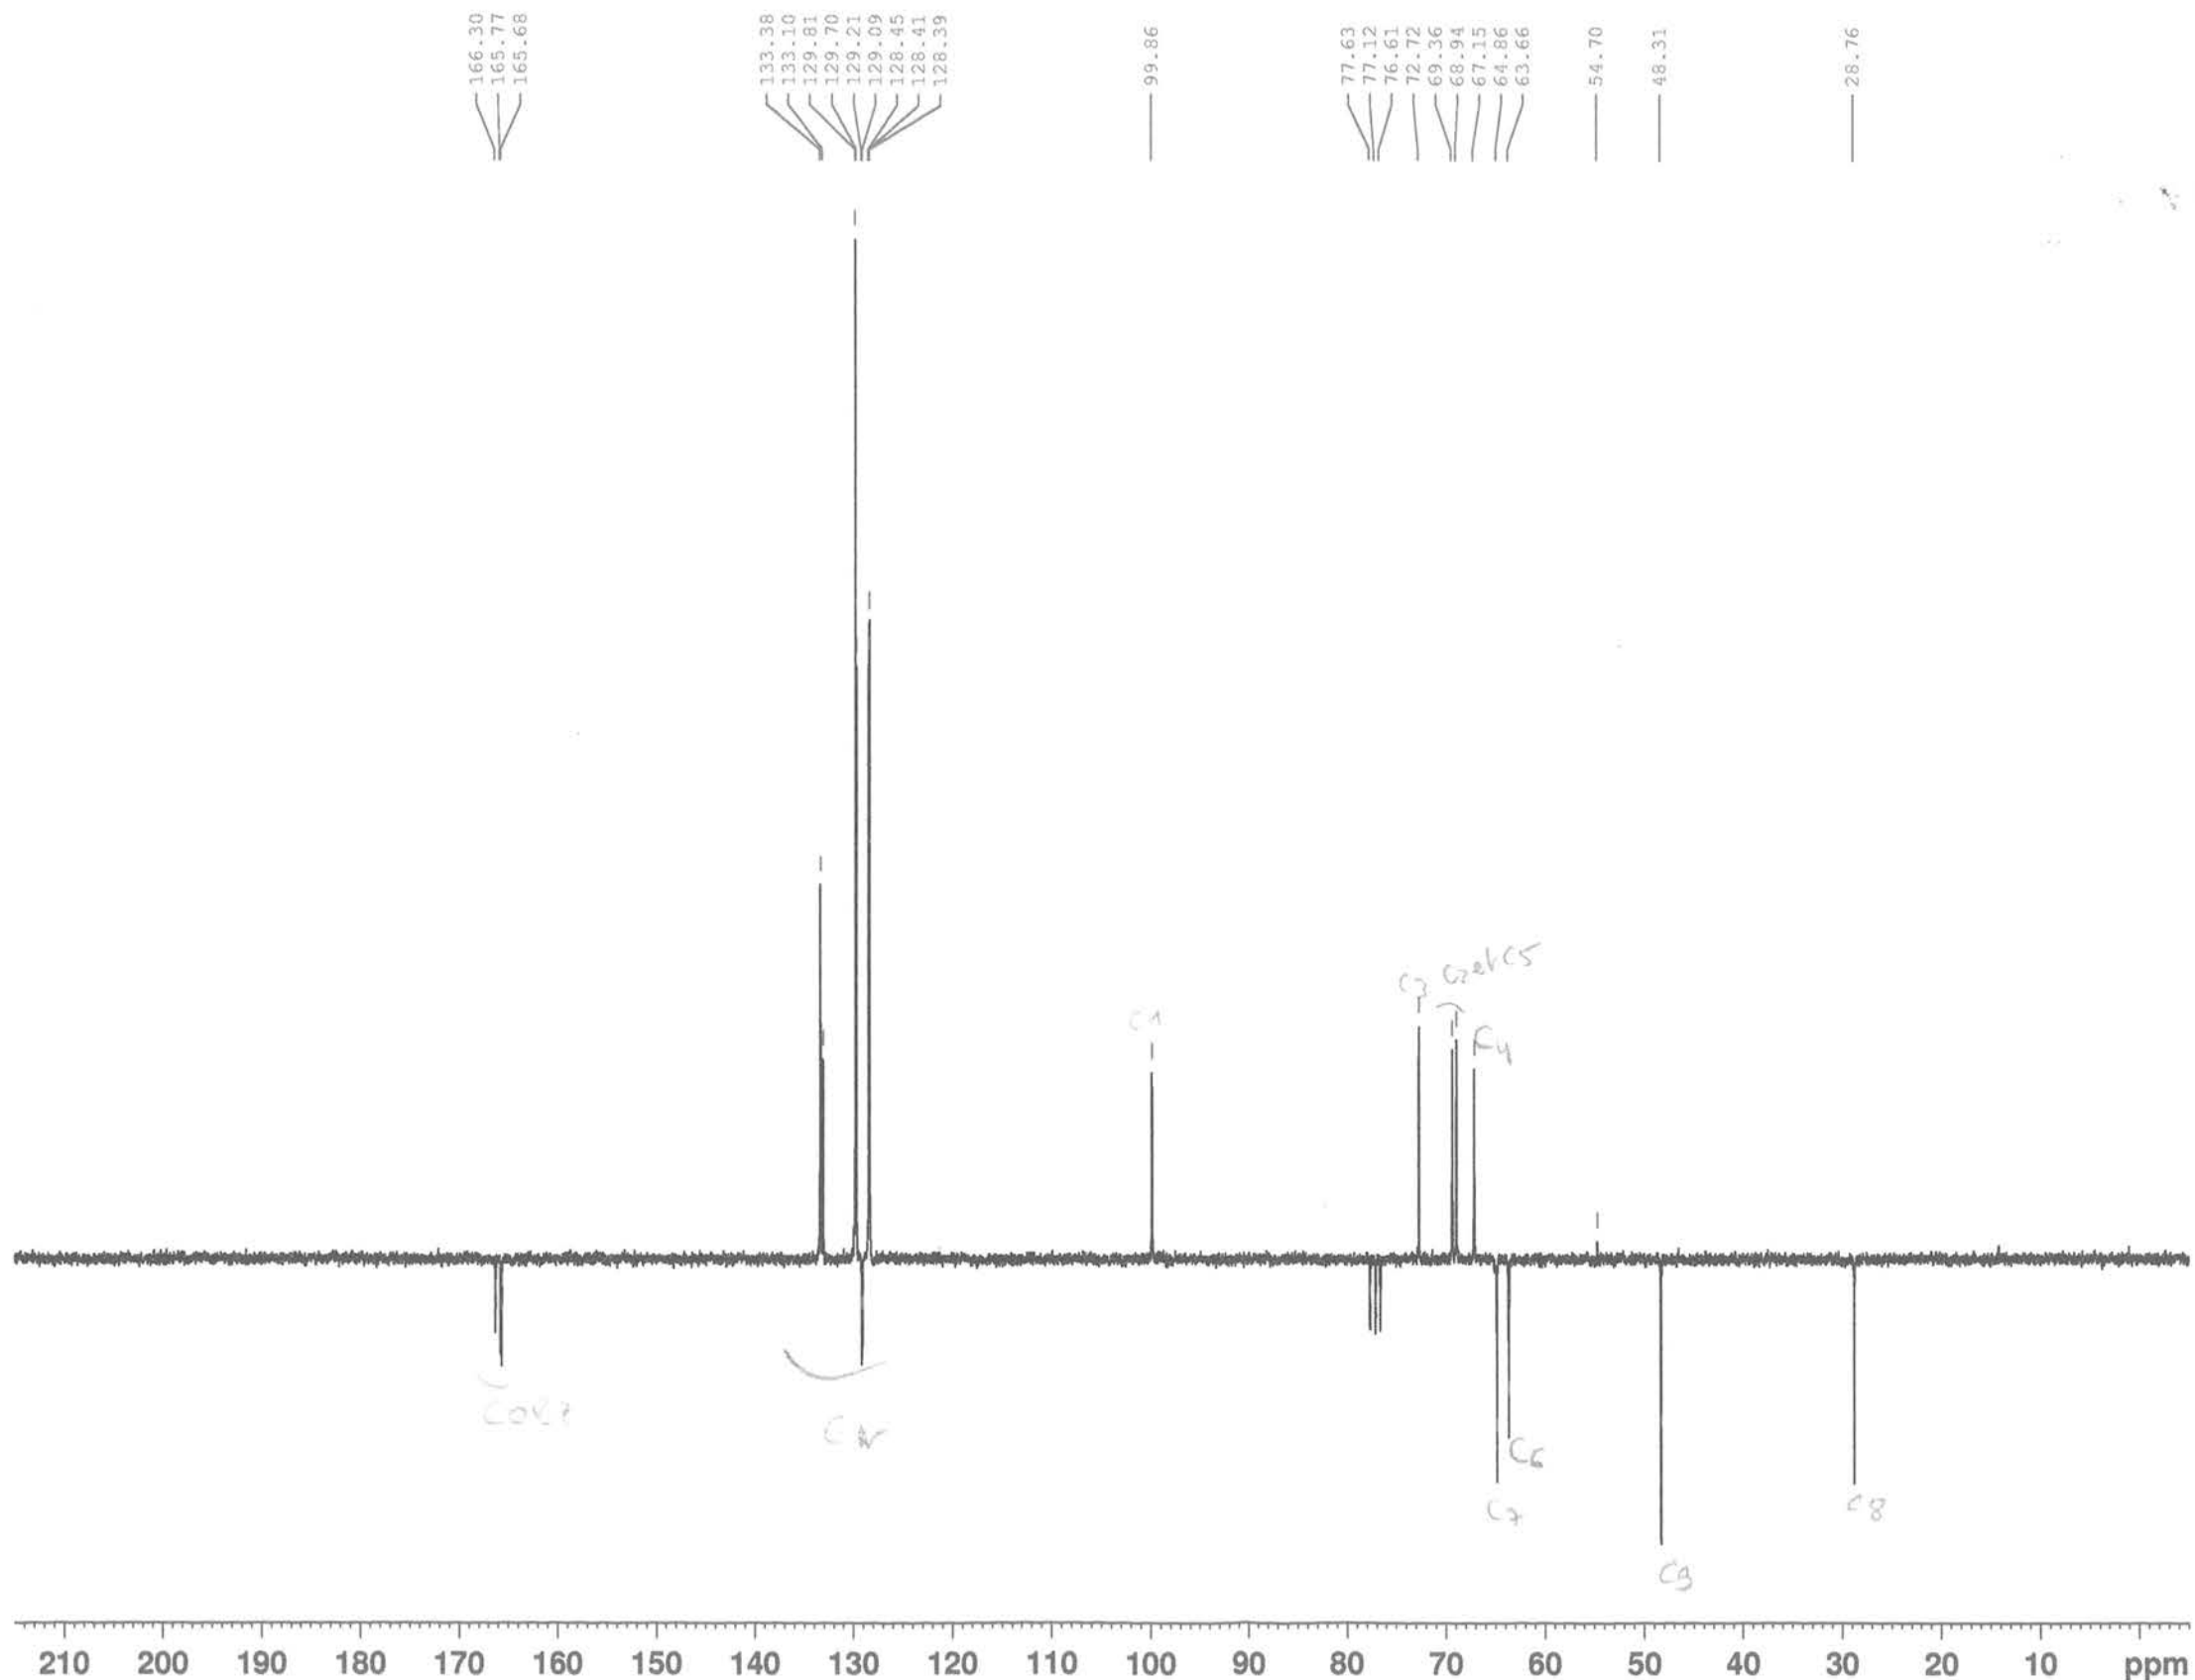

Current Data Parameters  
NAME Jun16-2011-JMM  
EXPNO 31  
PROCNO 1

F2 - Acquisition Parameters  
Date\_ 20110616  
Time 12.13  
INSTRUM spect  
PROBHD 5 mm QNP 1H/1  
PULPROG jmod  
TD 65536  
SOLVENT CDCl3  
NS 256  
DS 4  
SWH 15060.241 Hz  
FIDRES 0.229801 Hz  
AQ 2.1758451 sec  
RG 16384  
DW 33.200 usec  
DE 8.00 usec  
TE 300.0 K  
CNST2 145.0000000  
CNST11 1.0000000  
D1 2.00000000 sec  
d20 0.00689655 sec  
DELTA 0.00001019 sec  
TDO 1

==== CHANNEL f1 =====  
NUC1 13C  
P1 8.00 usec  
p2 16.00 usec  
PL1 -3.00 dB  
SFO1 62.9015280 MHz

==== CHANNEL f2 =====  
CPDPRG2 waltz16  
NUC2 1H  
PCPD2 100.00 usec  
PL2 -3.00 dB  
PL12 19.00 dB  
SFO2 250.1310005 MHz

F2 - Processing parameters  
SI 32768  
SF 62.8952390 MHz  
WDW EM  
SSB 0  
LB 1.00 Hz  
GB 0  
PC 1.40

9b

MP1/23A

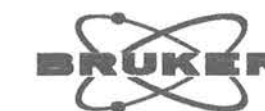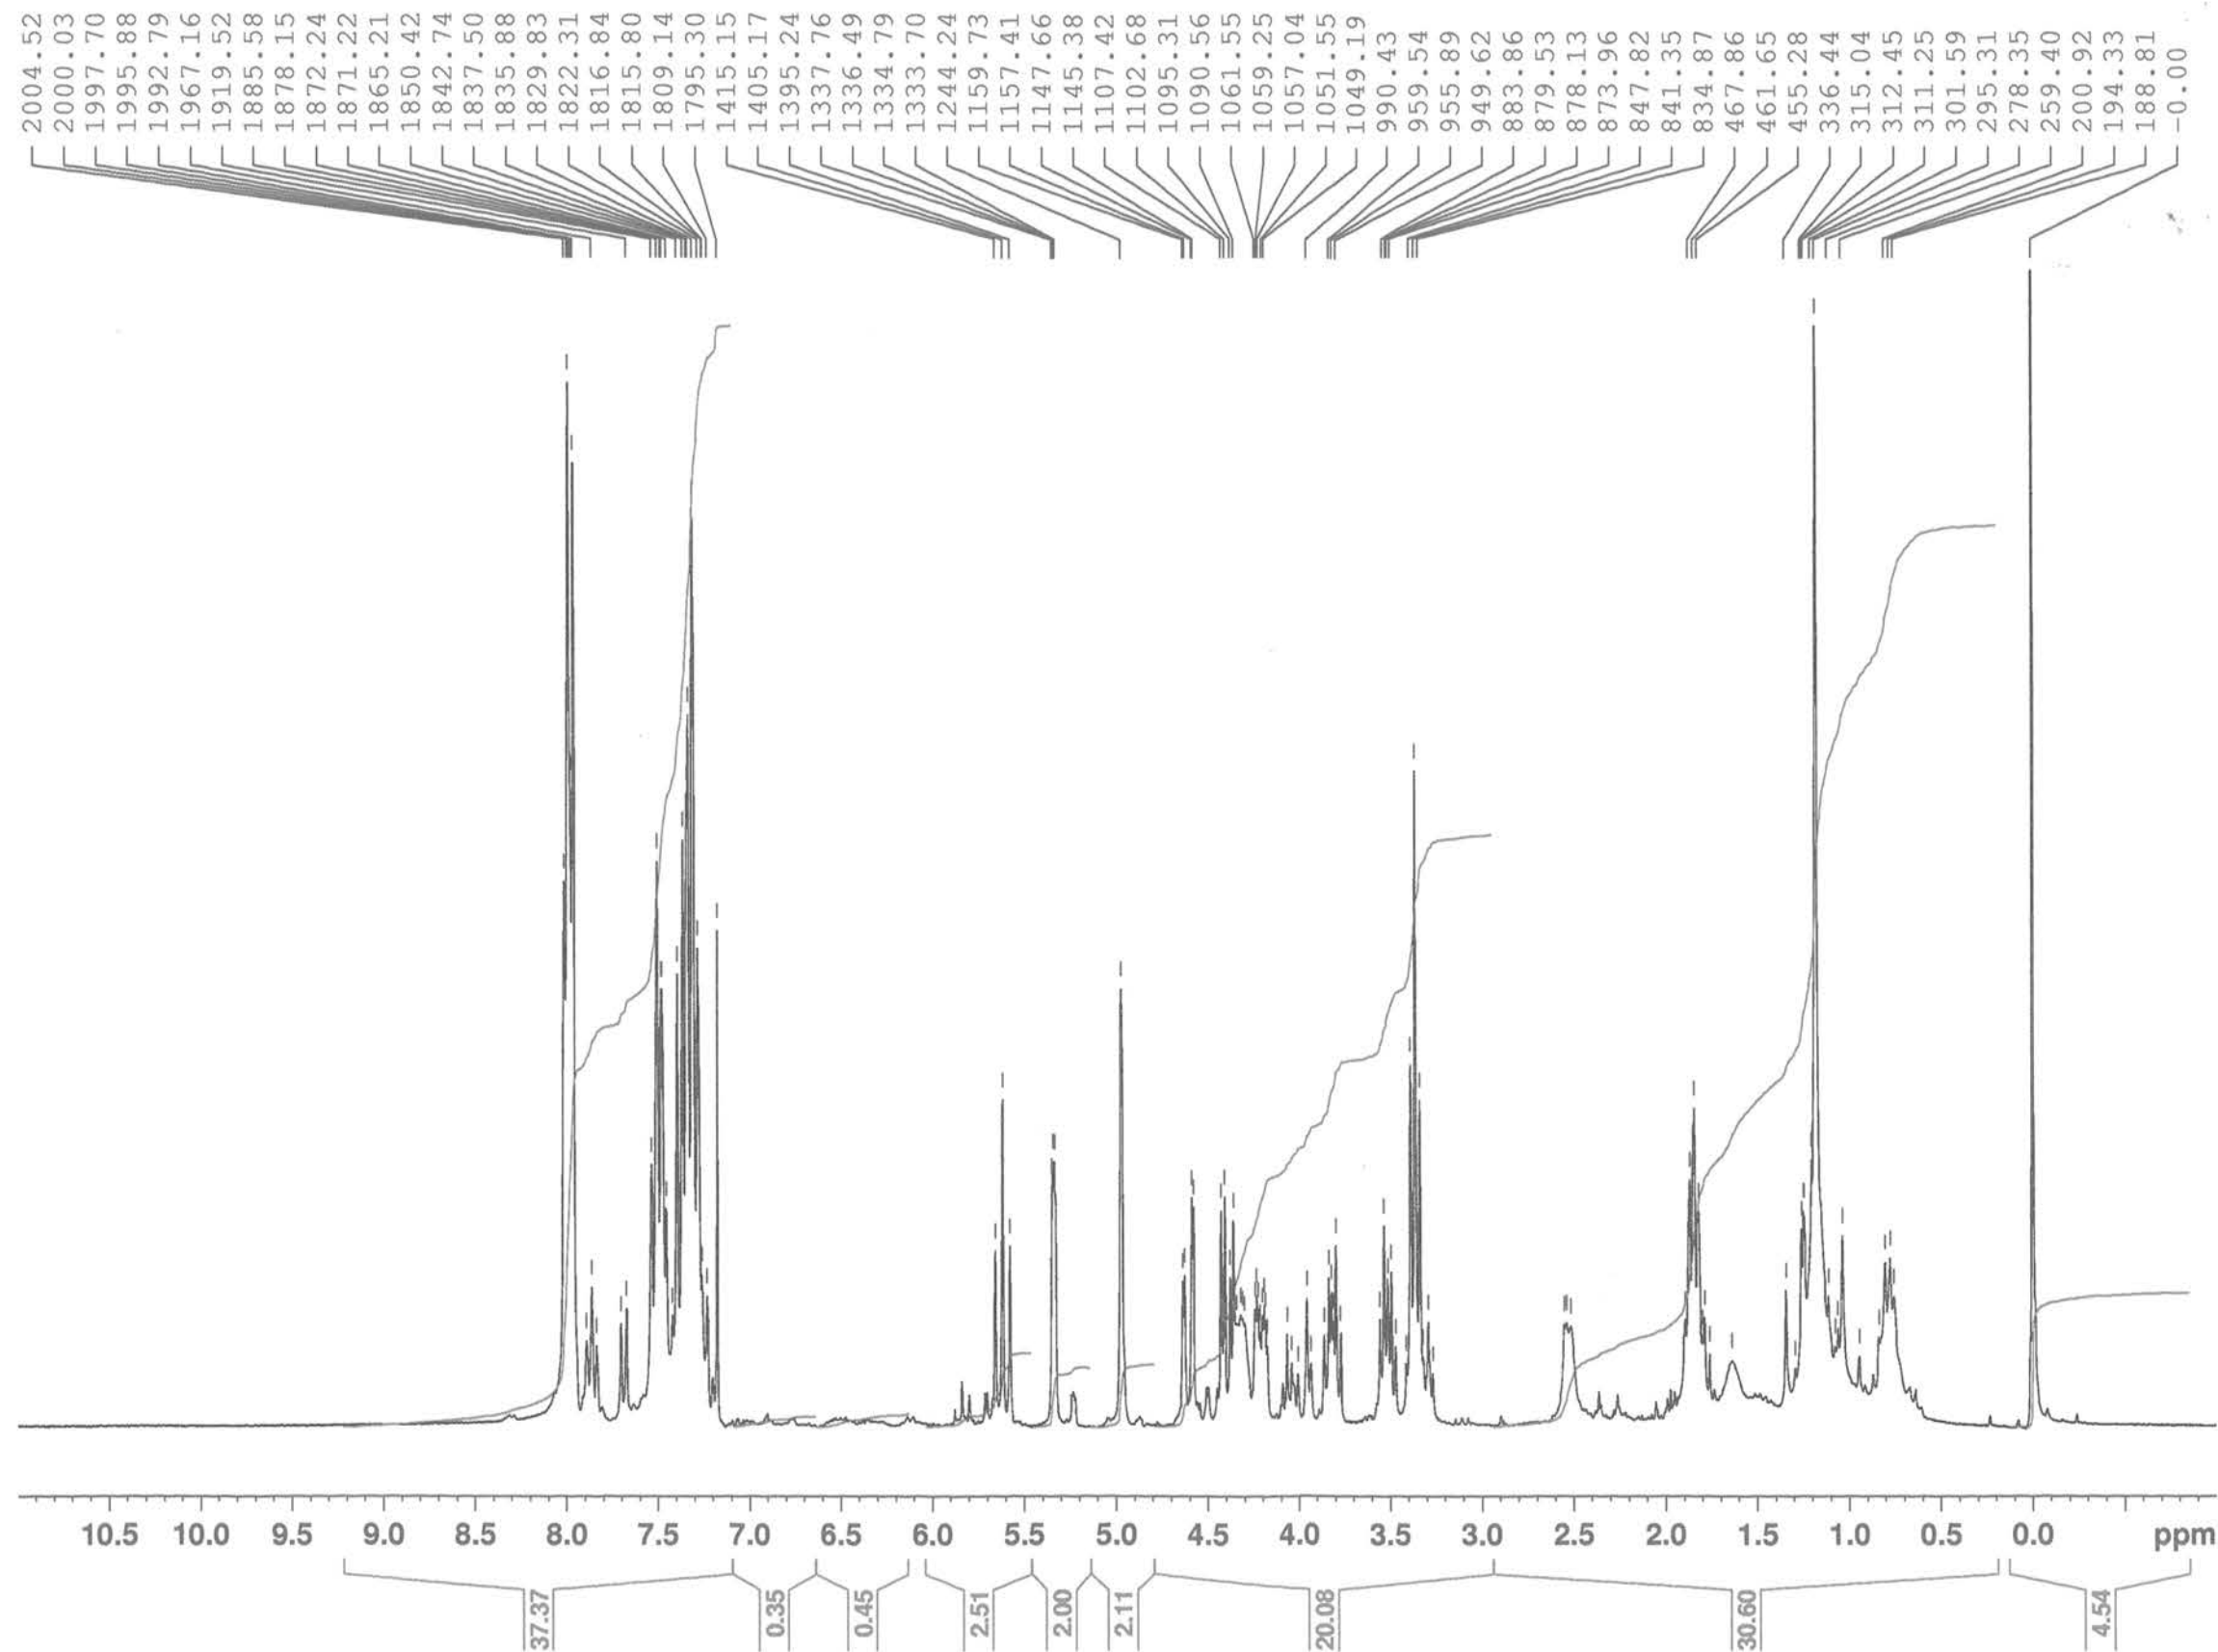

Current Data Parameters  
NAME Jun16-2011-JMM  
EXPNO 40  
PROCNO 1

F2 - Acquisition Parameters  
Date\_ 20110616  
Time 12.22  
INSTRUM spect  
PROBHD 5 mm QNP 1H/1  
PULPROG zg30  
TD 16384  
SOLVENT CDC13  
NS 64  
DS 2  
SWH 5175.983 Hz  
FIDRES 0.315917 Hz  
AQ 1.5827444 sec  
RG 406.4  
DW 96.600 usec  
DE 8.00 usec  
TE 300.0 K  
D1 0.20000000 sec  
TD0 1

----- CHANNEL f1 -----  
NUC1 1H  
P1 10.00 usec  
PL1 -3.00 dB  
SFO1 250.1315446 MHz

F2 - Processing parameters  
SI 8192  
SF 250.1300285 MHz  
WDW EM  
SSB 0  
LB 0.30 Hz  
GB 0  
PC 1.00



9b

MP1/23A

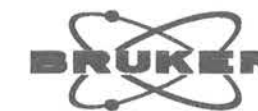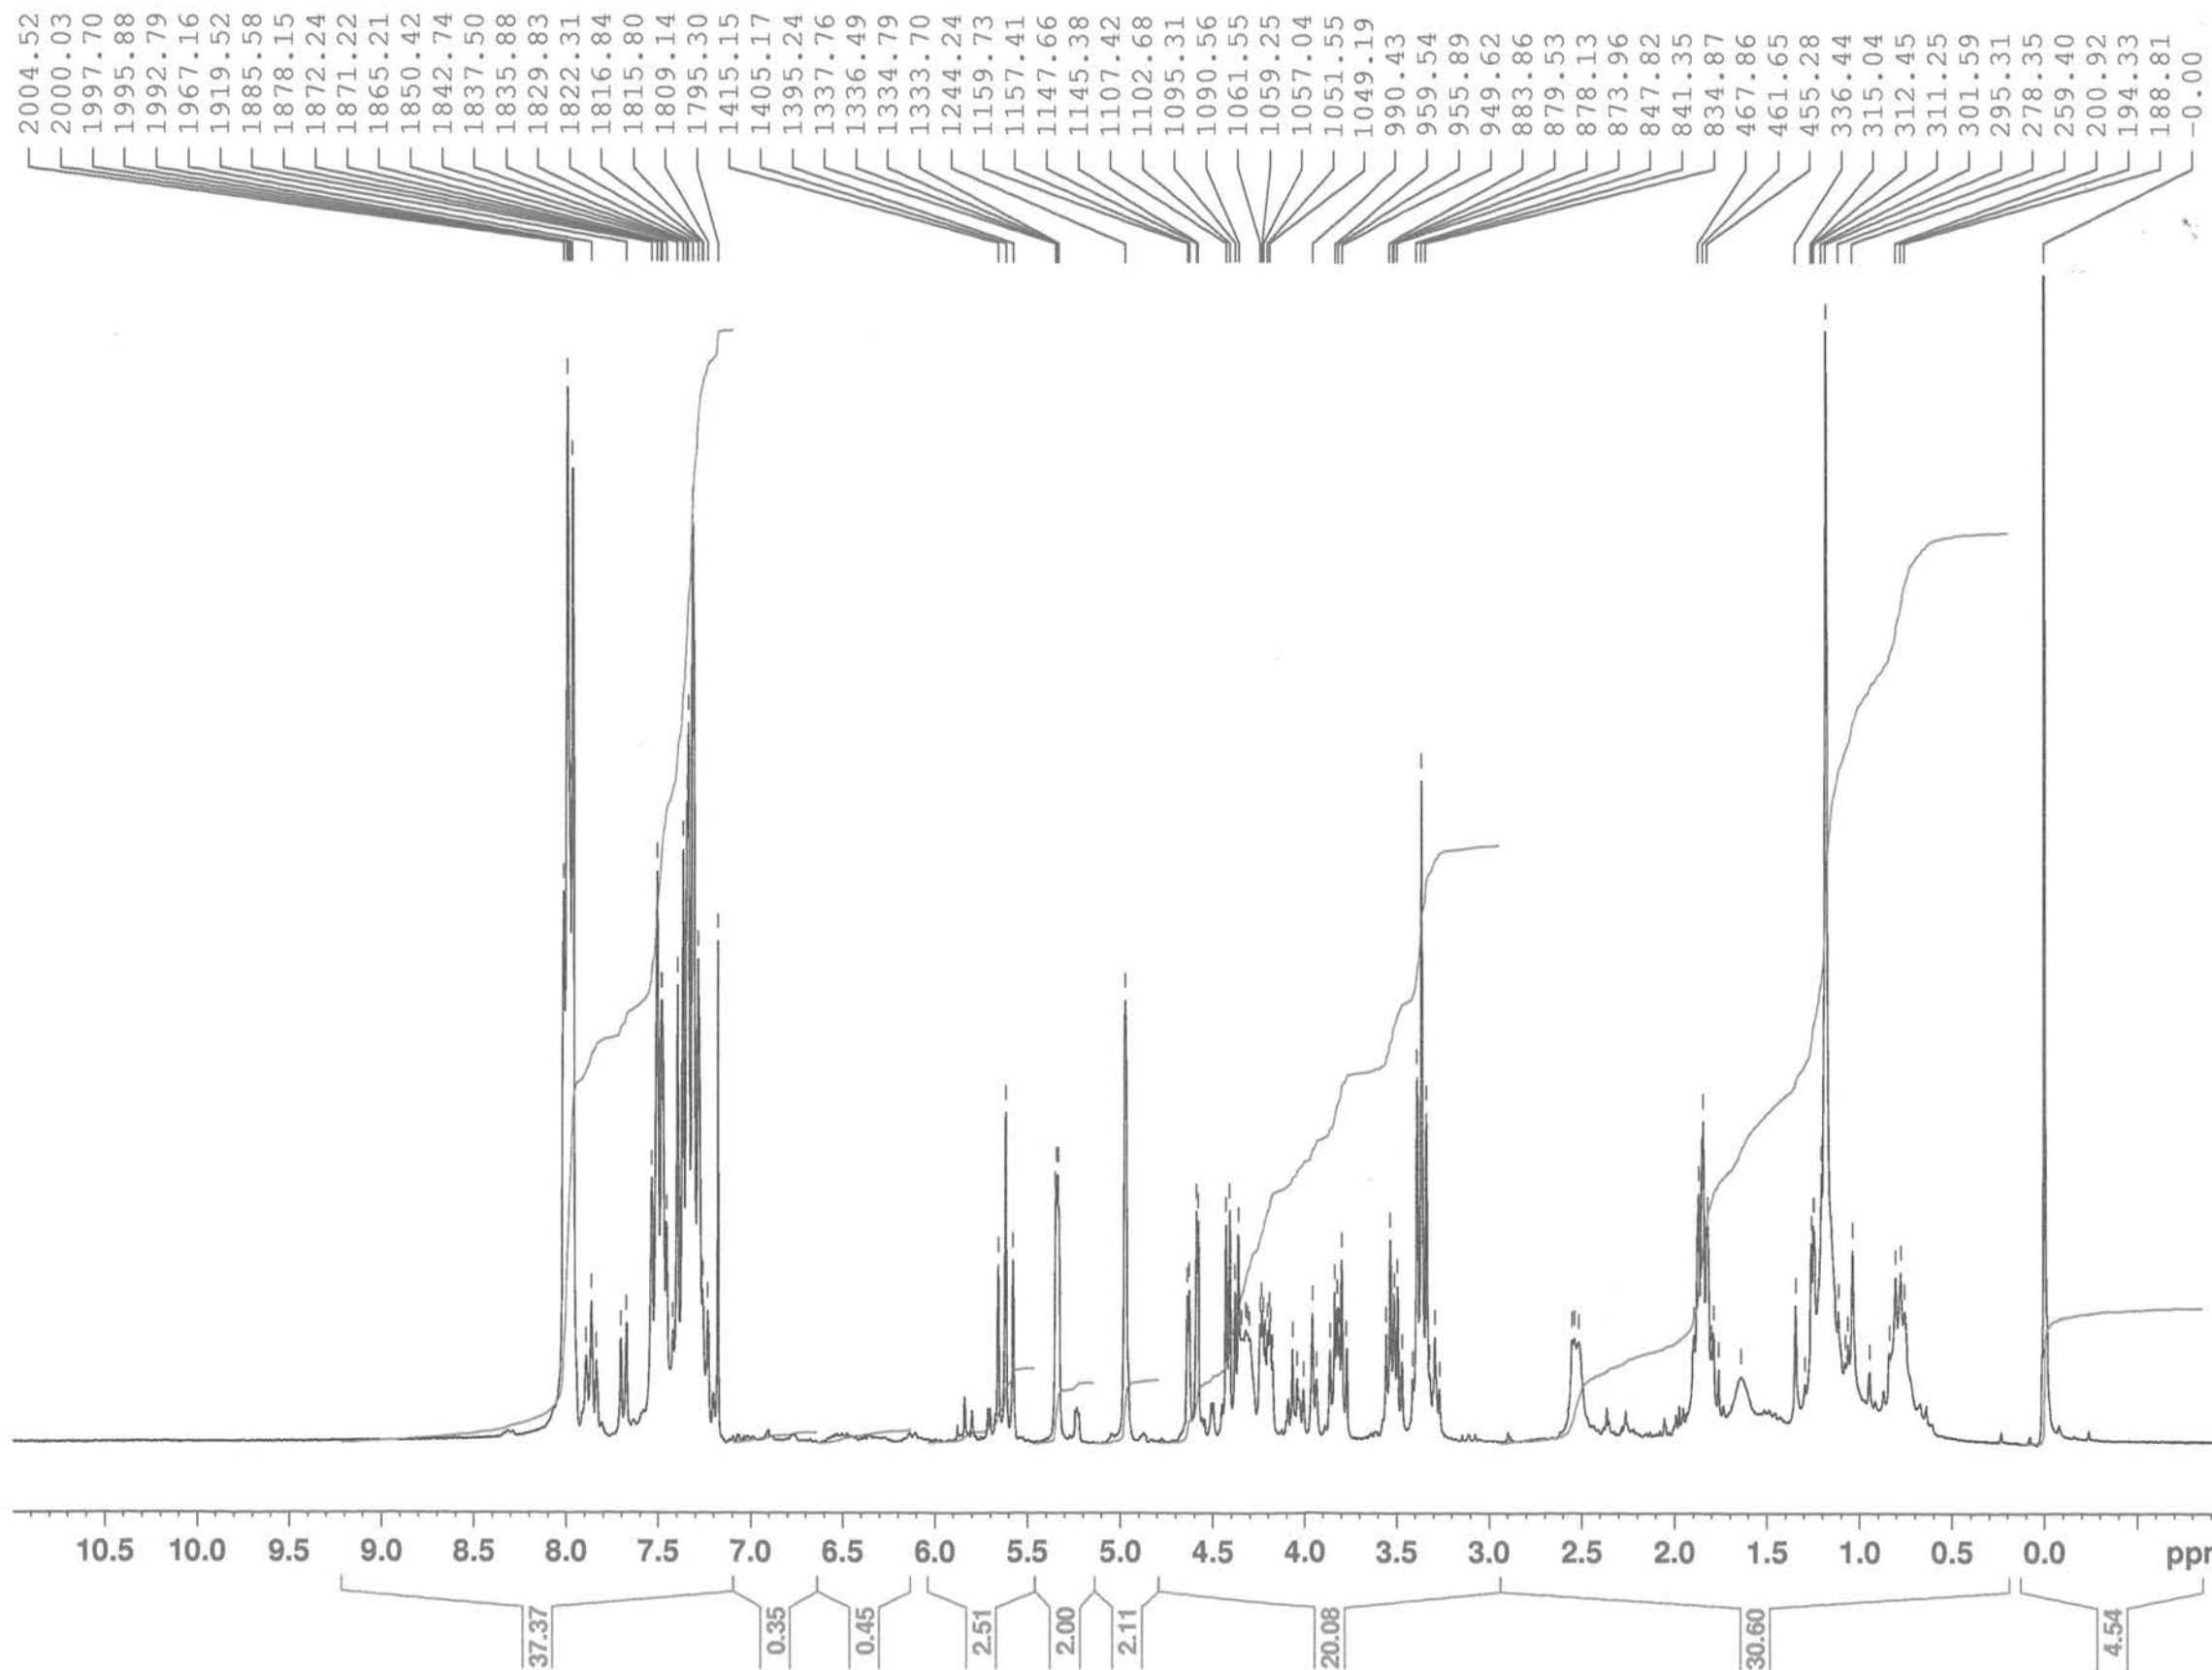

Current Data Parameters  
NAME Jun16-2011-JMM  
EXPNO 40  
PROCNO 1

F2 - Acquisition Parameters  
Date\_ 20110616  
Time 12.22  
INSTRUM spect  
PROBHD 5 mm QNP 1H/1  
PULPROG zg30  
TD 16384  
SOLVENT CDC13  
NS 64  
DS 2  
SWH 5175.983 Hz  
FIDRES 0.315917 Hz  
AQ 1.5827444 sec  
RG 406.4  
DW 96.600 usec  
DE 8.00 usec  
TE 300.0 K  
D1 0.20000000 sec  
TD0 1

===== CHANNEL f1 =====  
NUC1 1H  
P1 10.00 usec  
PL1 -3.00 dB  
SF01 250.1315446 MHz

F2 - Processing parameters  
SI 8192  
SF 250.1300285 MHz  
WDW EM  
SSB 0  
LB 0.30 Hz  
GB 0  
PC 1.00

gb

MP1/23A

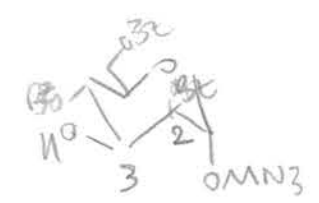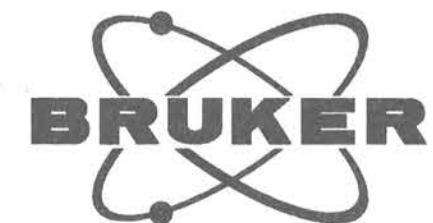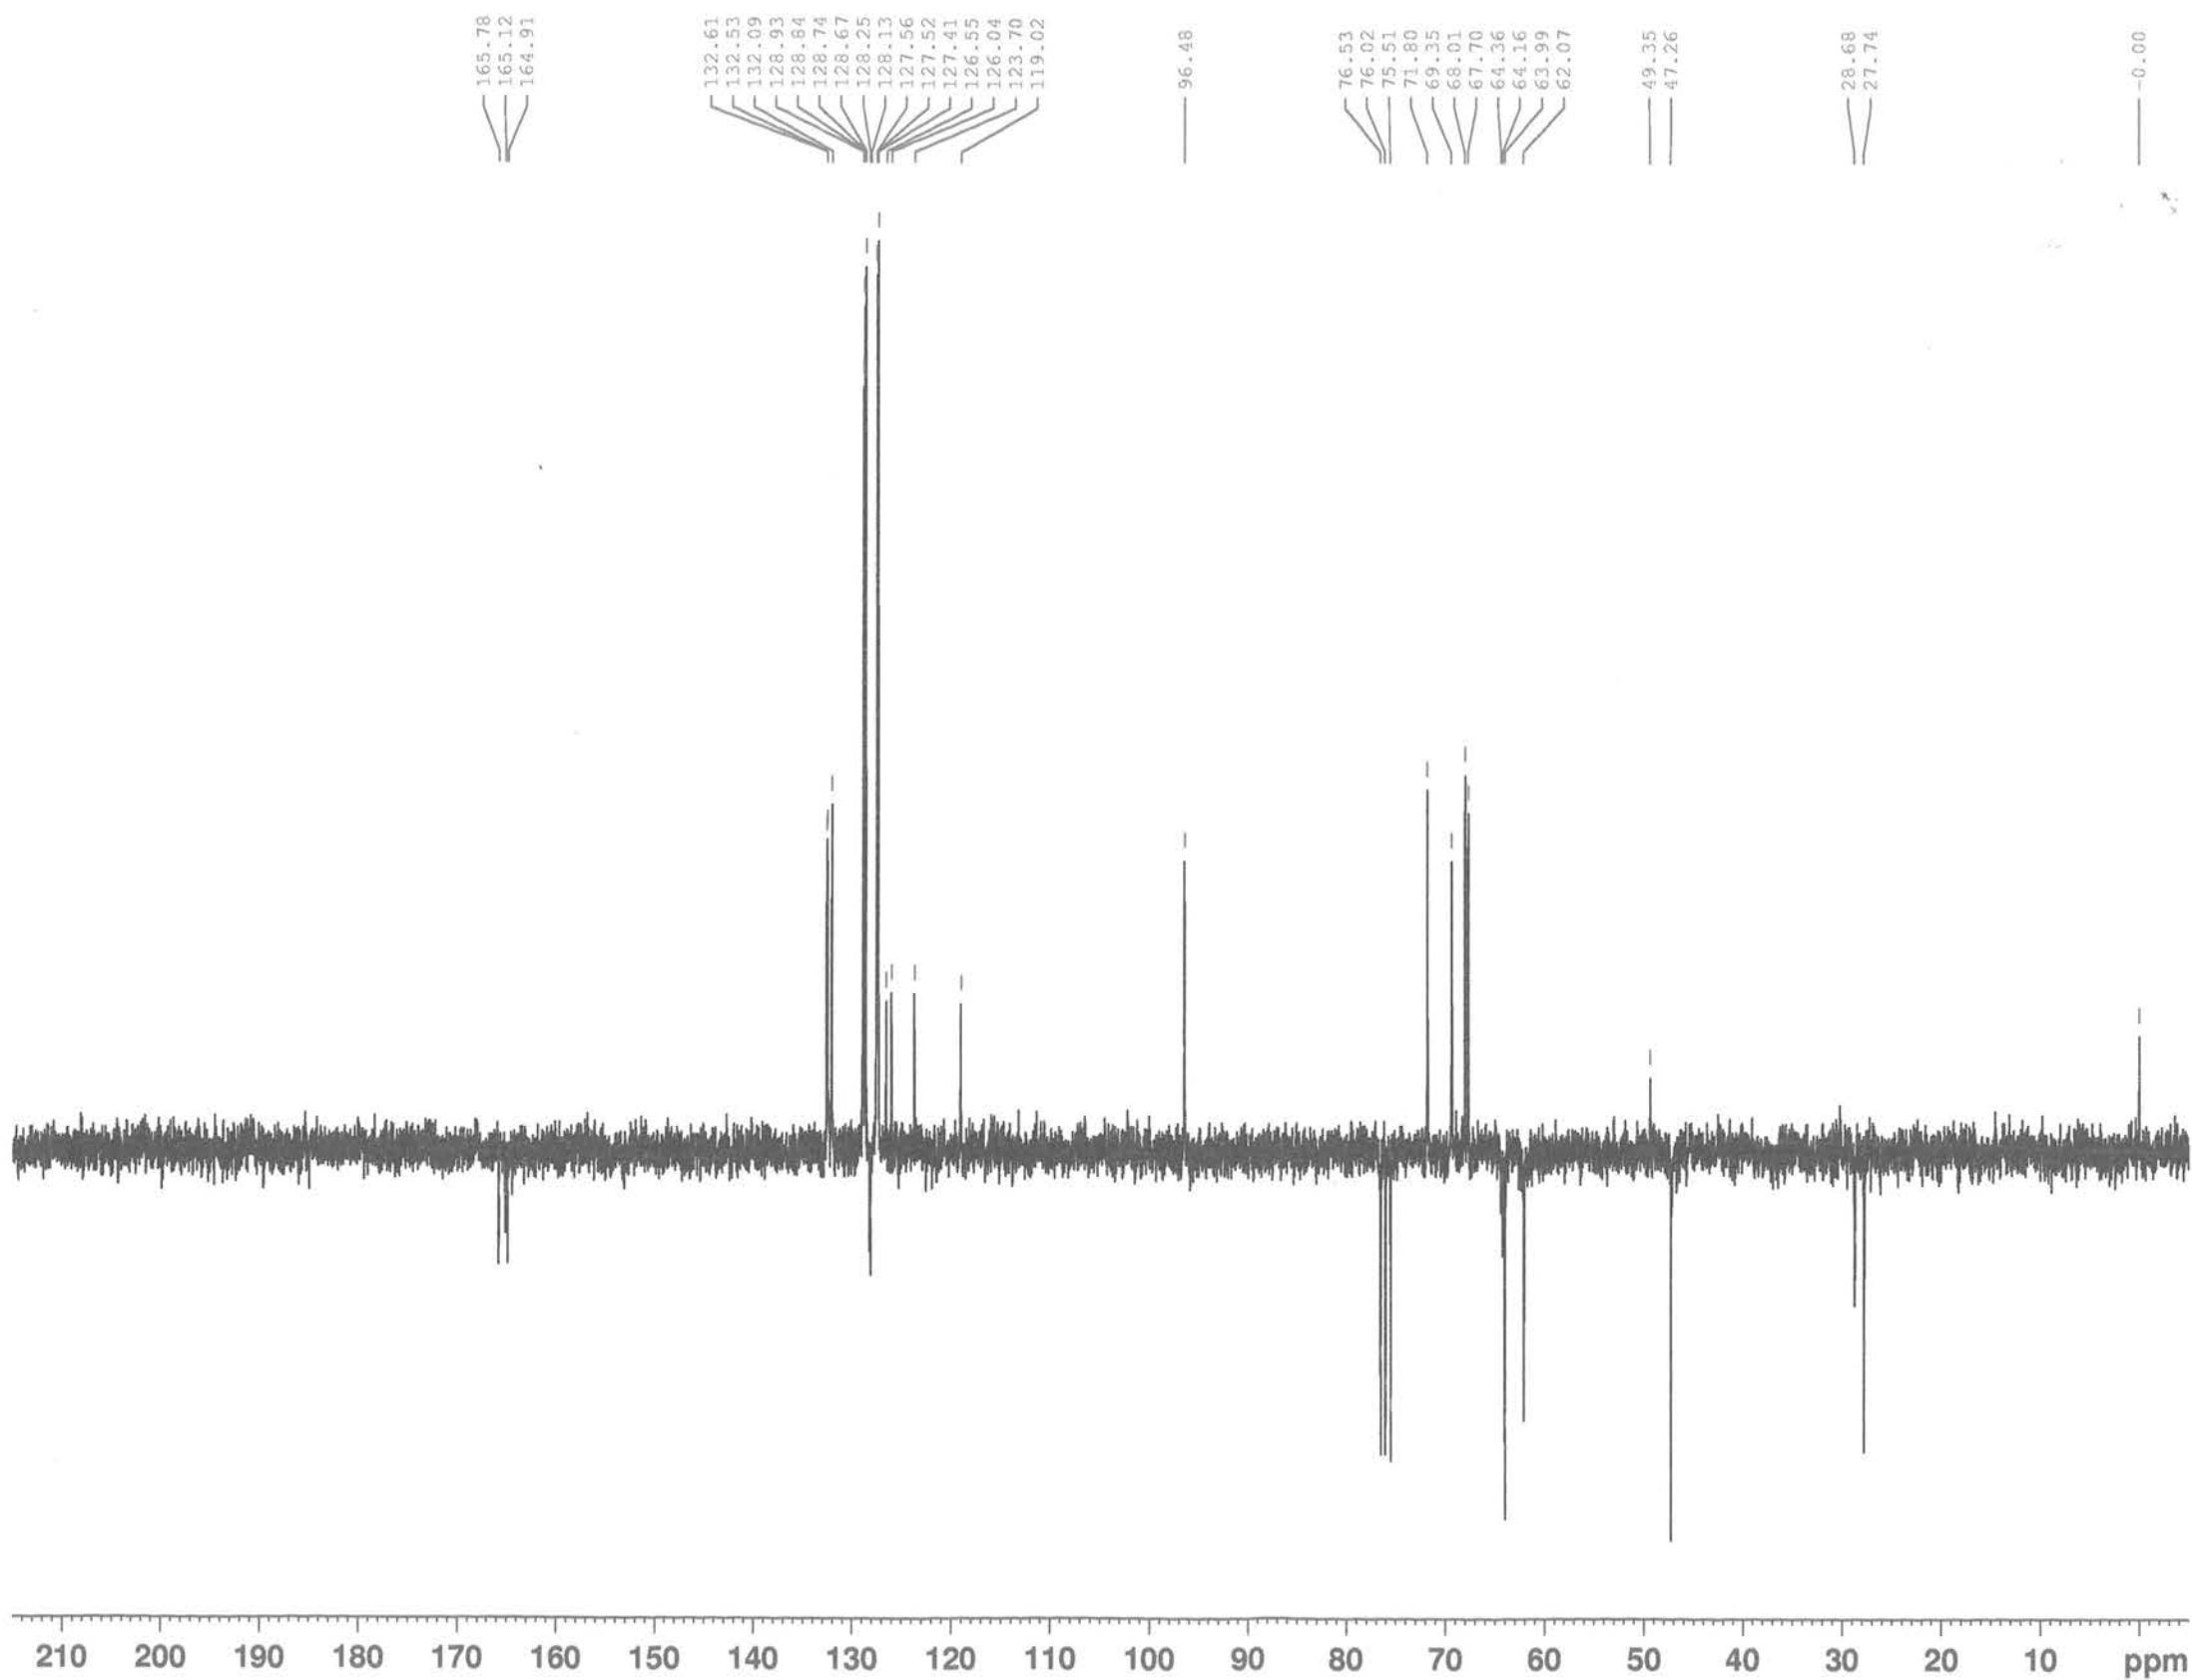

Current Data Parameters  
NAME Jun16-2011-JMM  
EXPNO 41  
PROCNO 1

F2 - Acquisition Parameters  
Date\_ 20110616  
Time 12.41  
INSTRUM spect  
PROBHD 5 mm QNP 1H/1  
PULPROG jmod  
TD 65536  
SOLVENT CDC13  
NS 256  
DS 4  
SWH 15060.241 Hz  
FIDRES 0.229801 Hz  
AQ 2.1758451 sec  
RG 16384  
DW 33.200 usec  
DE 8.00 usec  
TE 300.0 K  
CNST2 145.000000  
CNST11 1.000000  
D1 2.0000000 sec  
d20 0.00689655 sec  
DELTA 0.00001019 sec  
TD0 1

==== CHANNEL f1 =====  
NUC1 13C  
P1 8.00 usec  
p2 16.00 usec  
PL1 -3.00 dB  
SFO1 62.9015280 MHz

==== CHANNEL f2 =====  
CPDPRG2 waltz16  
NUC2 1H  
PCPD2 100.00 usec  
PL2 -3.00 dB  
PL12 19.00 dB  
SFO2 250.1310005 MHz

F2 - Processing parameters  
SI 32768  
SF 62.8953041 MHz  
WDW EM  
SSB 0  
LB 1.00 Hz  
GB 0  
PC 1.40



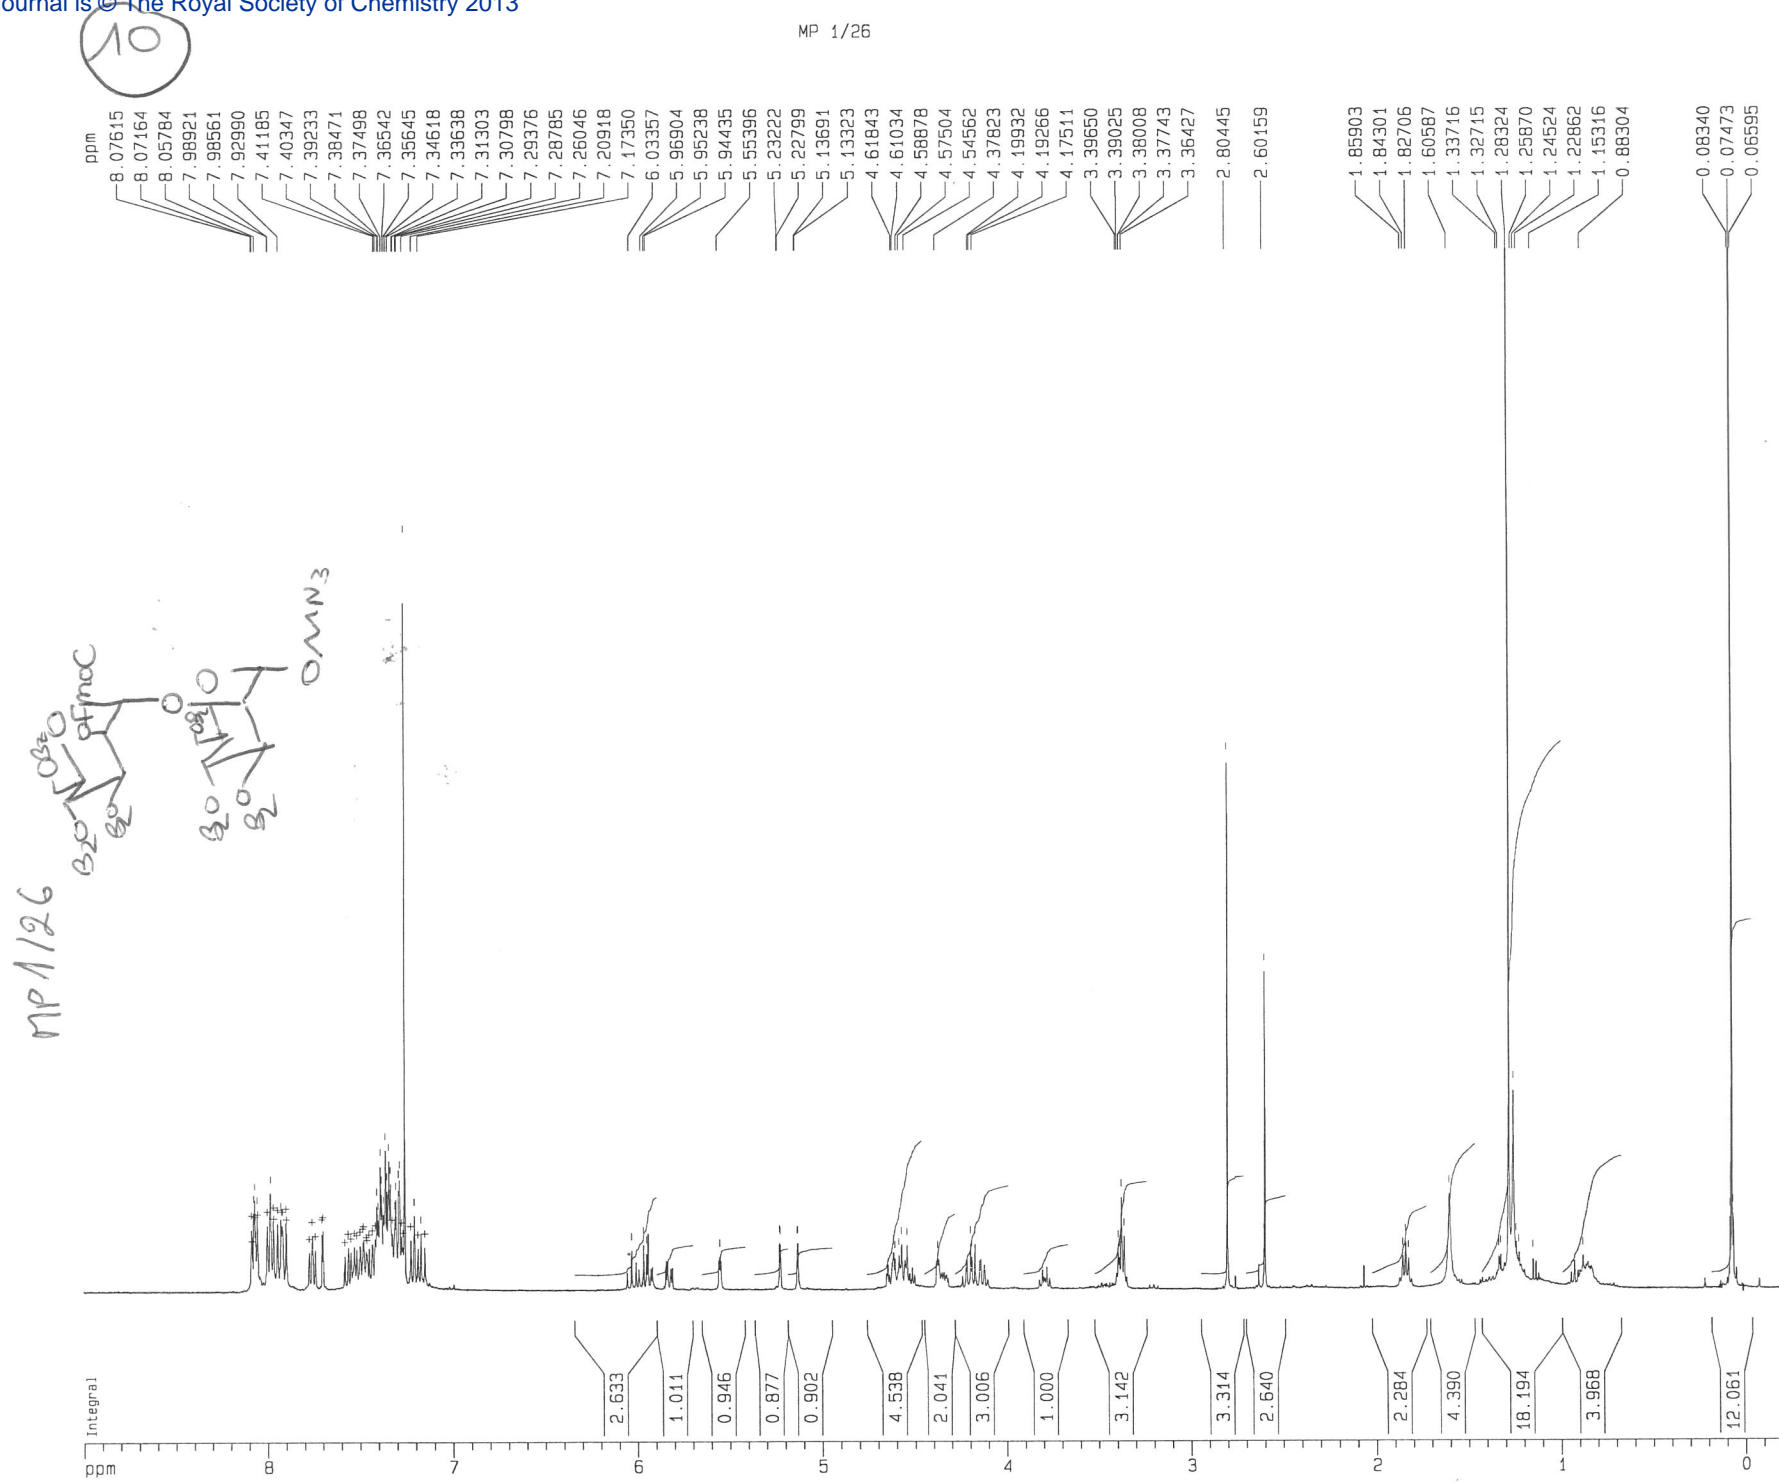

Current Data Parameters  
 NAME swmp0507  
 EXPNO 4  
 PROCNO 1

F2 - Acquisition Parameters  
 Date\_ 20110705  
 Time 12.40  
 INSTRUM spect  
 PROBHD 5 mm GNP 1H/1  
 PULPROG zg30  
 TD 32768  
 SOLVENT CDCl3  
 NS 16  
 DS 0  
 SWH 6410.256 Hz  
 FIDRES 0.195625 Hz  
 AQ 2.5559540 sec  
 RG 181  
 DW 78.000 usec  
 DE 6.00 usec  
 TE 300.0 K  
 D1 0.00000000 sec

===== CHANNEL f1 =====  
 NUC1 1H  
 P1 9.00 usec  
 PL1 0.00 dB  
 SF01 400.1324008 MHz

F2 - Processing parameters  
 SI 16384  
 SF 400.1300092 MHz  
 WDW no  
 SSB 0  
 LB 0.00 Hz  
 GB 0  
 PC 1.00

1D NMR plot parameters  
 CX 22.50 cm  
 F1P 9.000 ppm  
 F1 3601.17 Hz  
 F2P -0.200 ppm  
 F2 -80.03 Hz  
 PPMCM 0.40889 ppm/cm  
 HZCM 163.60870 Hz/cm

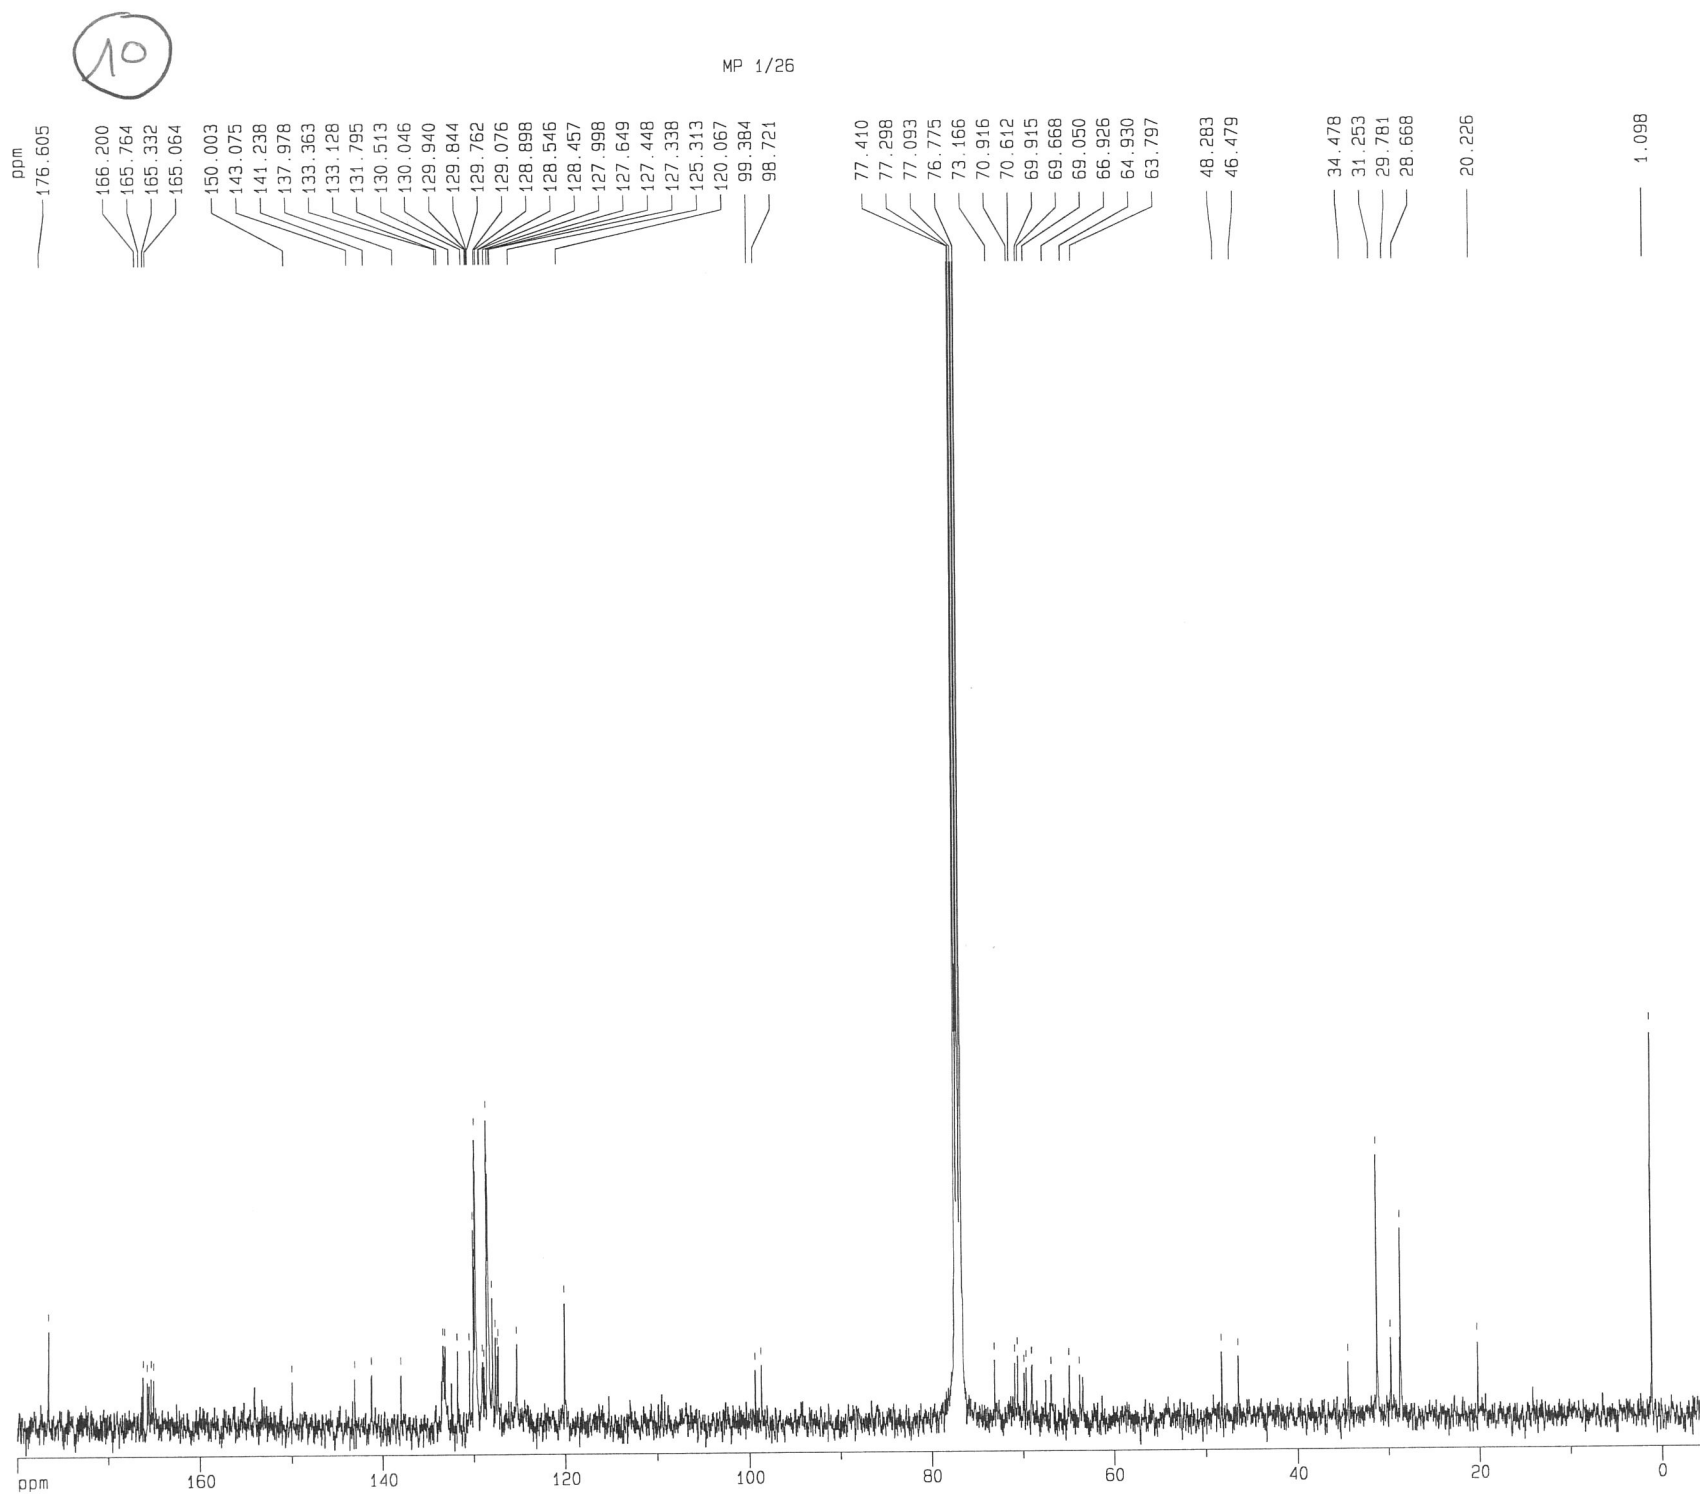

Current Data Parameters  
 NAME swmp0507  
 EXPNO 5  
 PROCNO 1

F2 - Acquisition Parameters  
 Date\_ 20110705  
 Time 15.08  
 INSTRUM spect  
 PROBHD 5 mm GNP 1H/1  
 PULPROG zgpg30  
 TD 65536  
 SOLVENT DMSO  
 NS 2400  
 DS 0  
 SWH 25000.000 Hz  
 FIDRES 0.381470 Hz  
 AQ 1.3107700 sec  
 RG 6502  
 DW 20.000 usec  
 DE 25.00 usec  
 TE 300.0 K  
 D1 2.00000000 sec  
 D11 0.03000000 sec  
 D12 0.00002000 sec

===== CHANNEL f1 =====  
 NUC1 13C  
 P1 7.50 usec  
 PL1 -6.00 dB  
 SF01 100.6237964 MHz

===== CHANNEL f2 =====  
 CPDPRG2 waltz16  
 NUC2 1H  
 PCPD2 100.00 usec  
 PL2 120.00 dB  
 PL12 20.00 dB  
 PL13 26.00 dB  
 SF02 400.1316005 MHz

F2 - Processing parameters  
 SI 32768  
 SF 100.6127631 MHz  
 WDW EM  
 SSB 0  
 LB 3.00 Hz  
 GB 0  
 PC 1.00

1D NMR plot parameters  
 CX 22.50 cm  
 F1P 180.000 ppm  
 F1 18110.30 Hz  
 F2P -5.000 ppm  
 F2 -503.06 Hz  
 PPMCM 8.22222 ppm/cm  
 HZCM 827.26050 Hz/cm

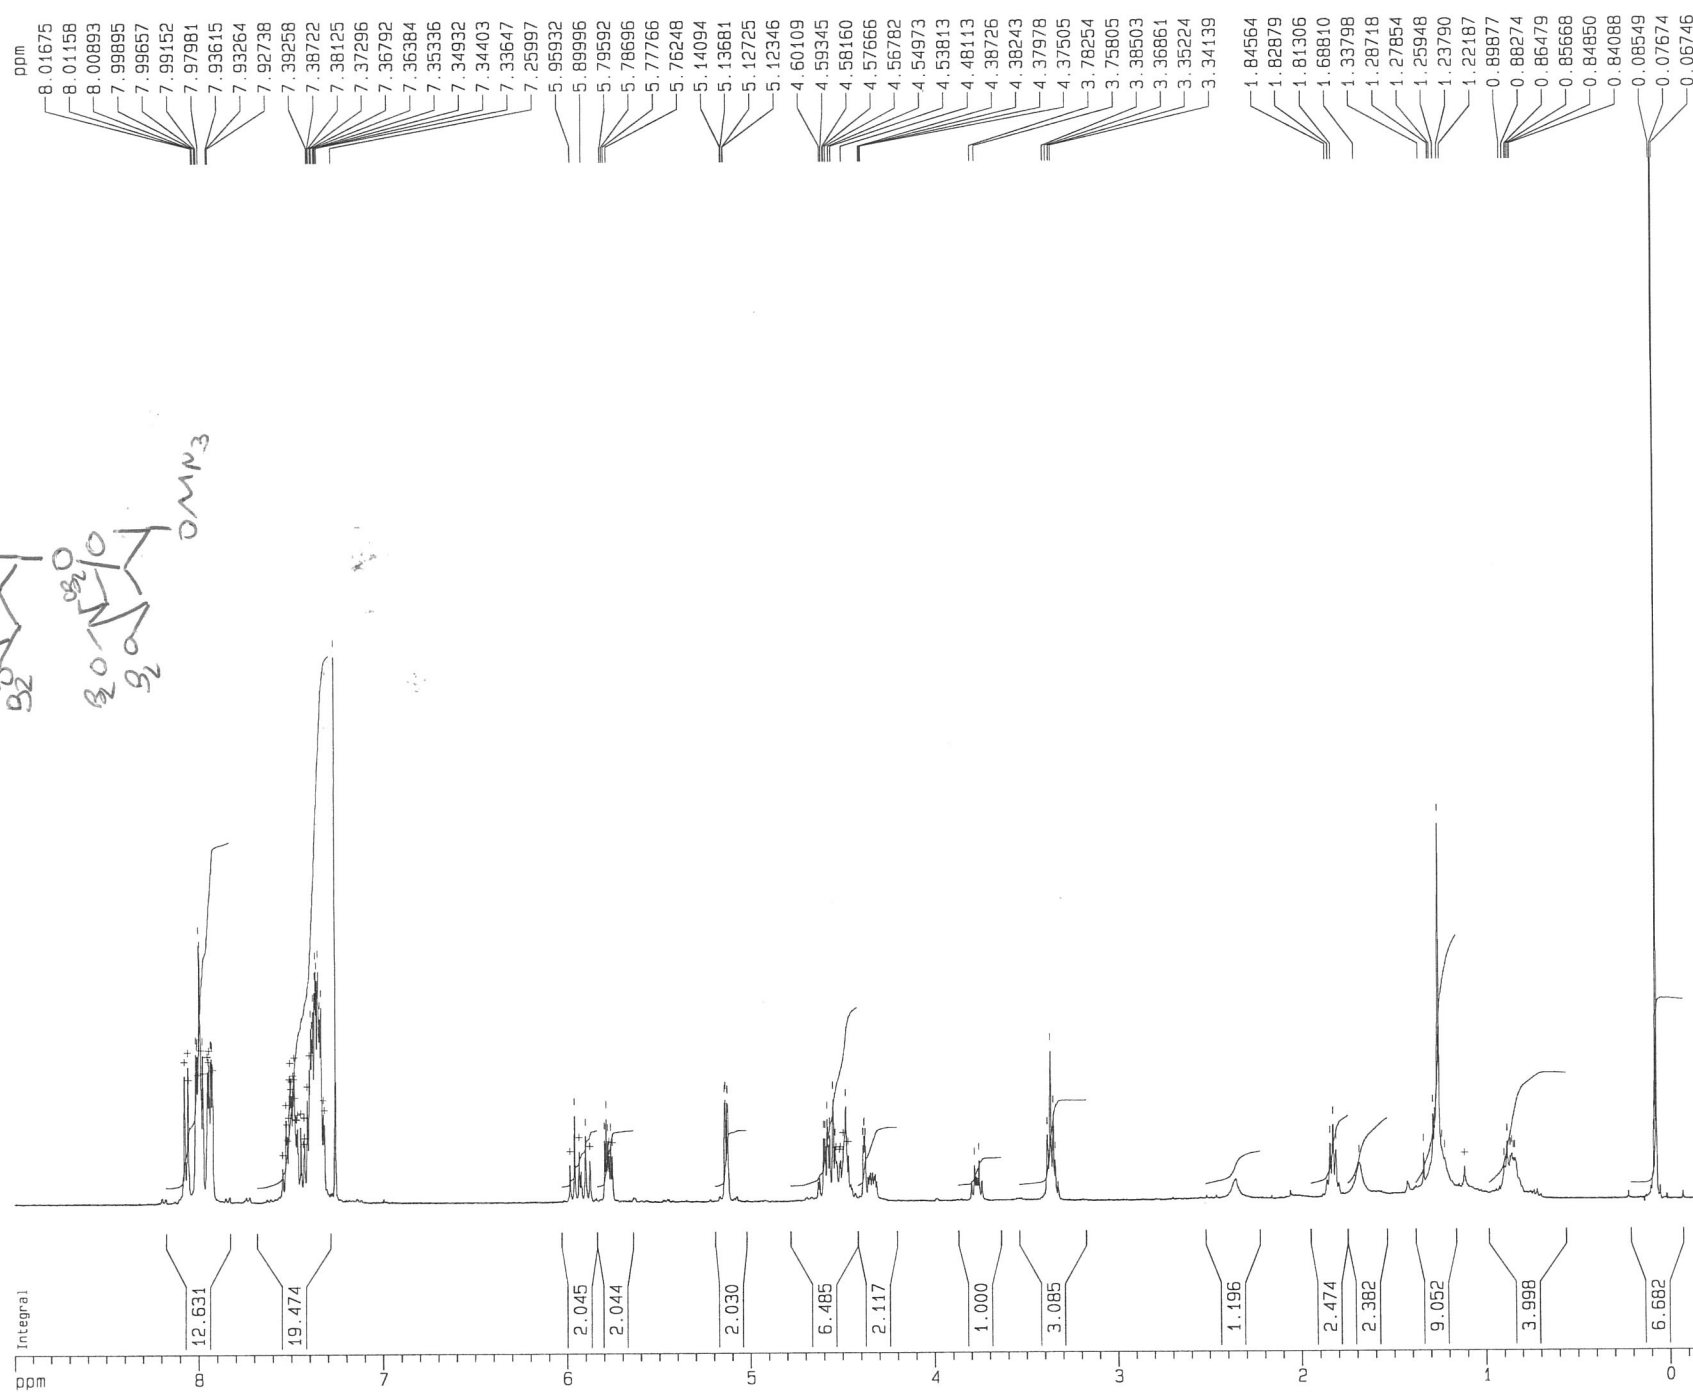

Current Data Parameters  
 NAME swmp0507  
 EXPNO 1  
 PROCNO 1

F2 - Acquisition Parameters  
 Date\_ 20110705  
 Time 11.25  
 INSTRUM spect  
 PROBHD 5 mm GNP 1H/1  
 PULPROG zg30  
 TD 32768  
 SOLVENT CDCl3  
 NS 16  
 DS 0  
 SWH 6410.256 Hz  
 FIDRES 0.195625 Hz  
 AQ 2.5559540 sec  
 RG 203.2  
 DW 78.000 usec  
 DE 6.00 usec  
 TE 300.0 K  
 D1 0.00000000 sec

===== CHANNEL f1 =====  
 NUC1 1H  
 P1 9.00 usec  
 PL1 0.00 dB  
 SF01 400.1324008 MHz

F2 - Processing parameters  
 SI 16384  
 SF 400.1300095 MHz  
 WDW no  
 SSB 0  
 LB 0.00 Hz  
 GB 0  
 PC 1.00

1D NMR plot parameters  
 CX 22.50 cm  
 F1P 9.000 ppm  
 F1 3601.17 Hz  
 F2P -0.200 ppm  
 F2 -80.03 Hz  
 PPMCM 0.40889 ppm/cm  
 HZCM 163.60870 Hz/cm

Ma

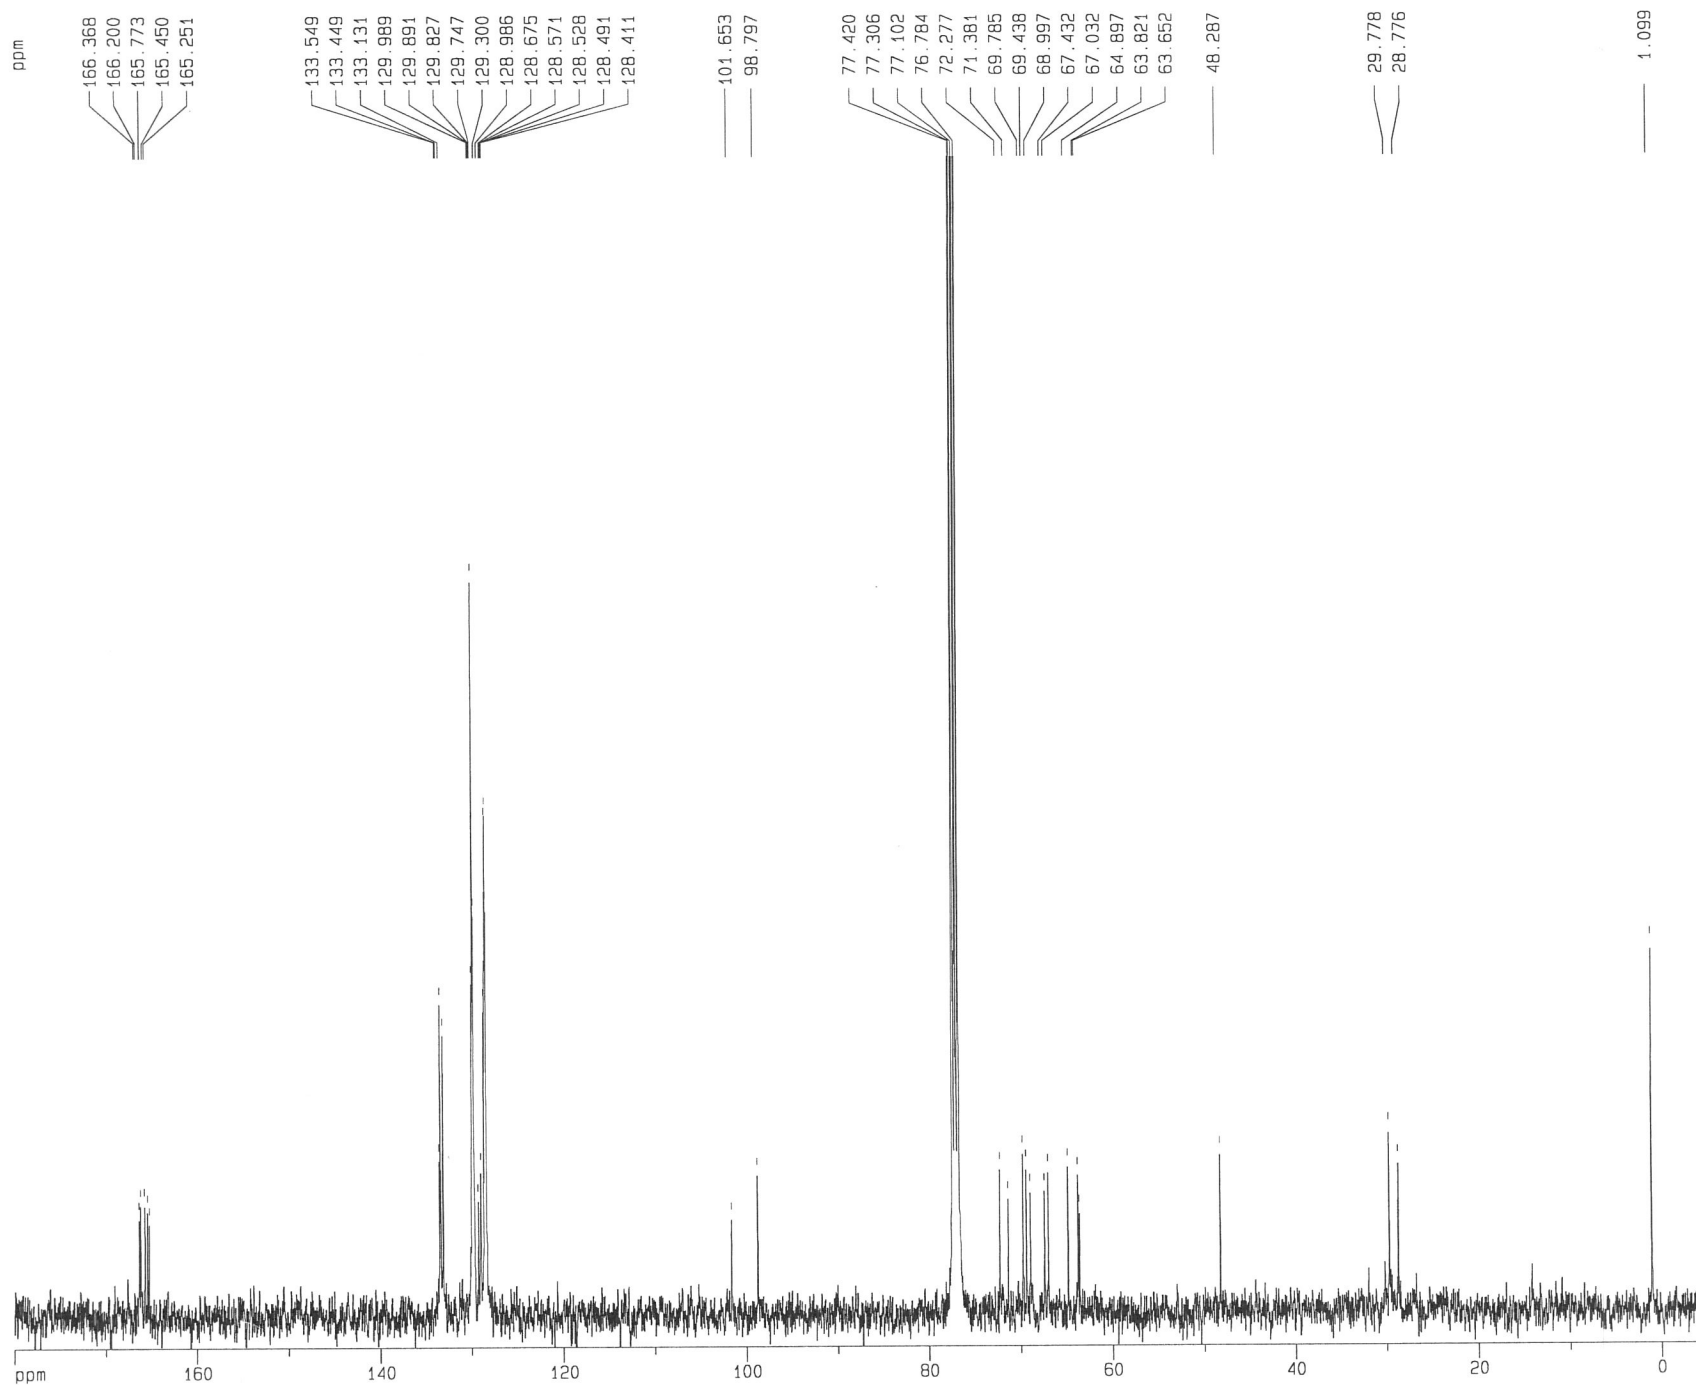

Current Data Parameters  
 NAME swmp0507  
 EXPNO 2  
 PROCNO 1

F2 - Acquisition Parameters  
 Date\_ 20110705  
 Time 11.49  
 INSTRUM spect  
 PROBHD 5 mm GNP 1H/1  
 PULPROG zgpg30  
 TD 65536  
 SOLVENT DMSO  
 NS 800  
 DS 0  
 SWH 25000.000 Hz  
 FIDRES 0.381470 Hz  
 AQ 1.3107700 sec  
 RG 6502  
 DW 20.000 usec  
 DE 25.00 usec  
 TE 300.0 K  
 D1 2.00000000 sec  
 D11 0.03000000 sec  
 D12 0.00002000 sec

===== CHANNEL f1 =====  
 NUC1 13C  
 P1 7.50 usec  
 PL1 -6.00 dB  
 SF01 100.6237964 MHz

===== CHANNEL f2 =====  
 CPDPRG2 waltz16  
 NUC2 1H  
 PCPD2 100.00 usec  
 PL2 120.00 dB  
 PL13 20.00 dB  
 PL12 26.00 dB  
 SF02 400.1316005 MHz

F2 - Processing parameters  
 SI 32768  
 SF 100.6127631 MHz  
 WDW EM  
 SSB 0  
 LB 3.00 Hz  
 GB 0  
 PC 1.00

1D NMR plot parameters  
 CX 22.50 cm  
 F1P 180.000 ppm  
 F1 18110.30 Hz  
 F2P -5.000 ppm  
 F2 -503.06 Hz  
 PPMCM 8.22222 ppm/cm  
 HZCM 827.26050 Hz/cm



11b

MP 1/32 A2

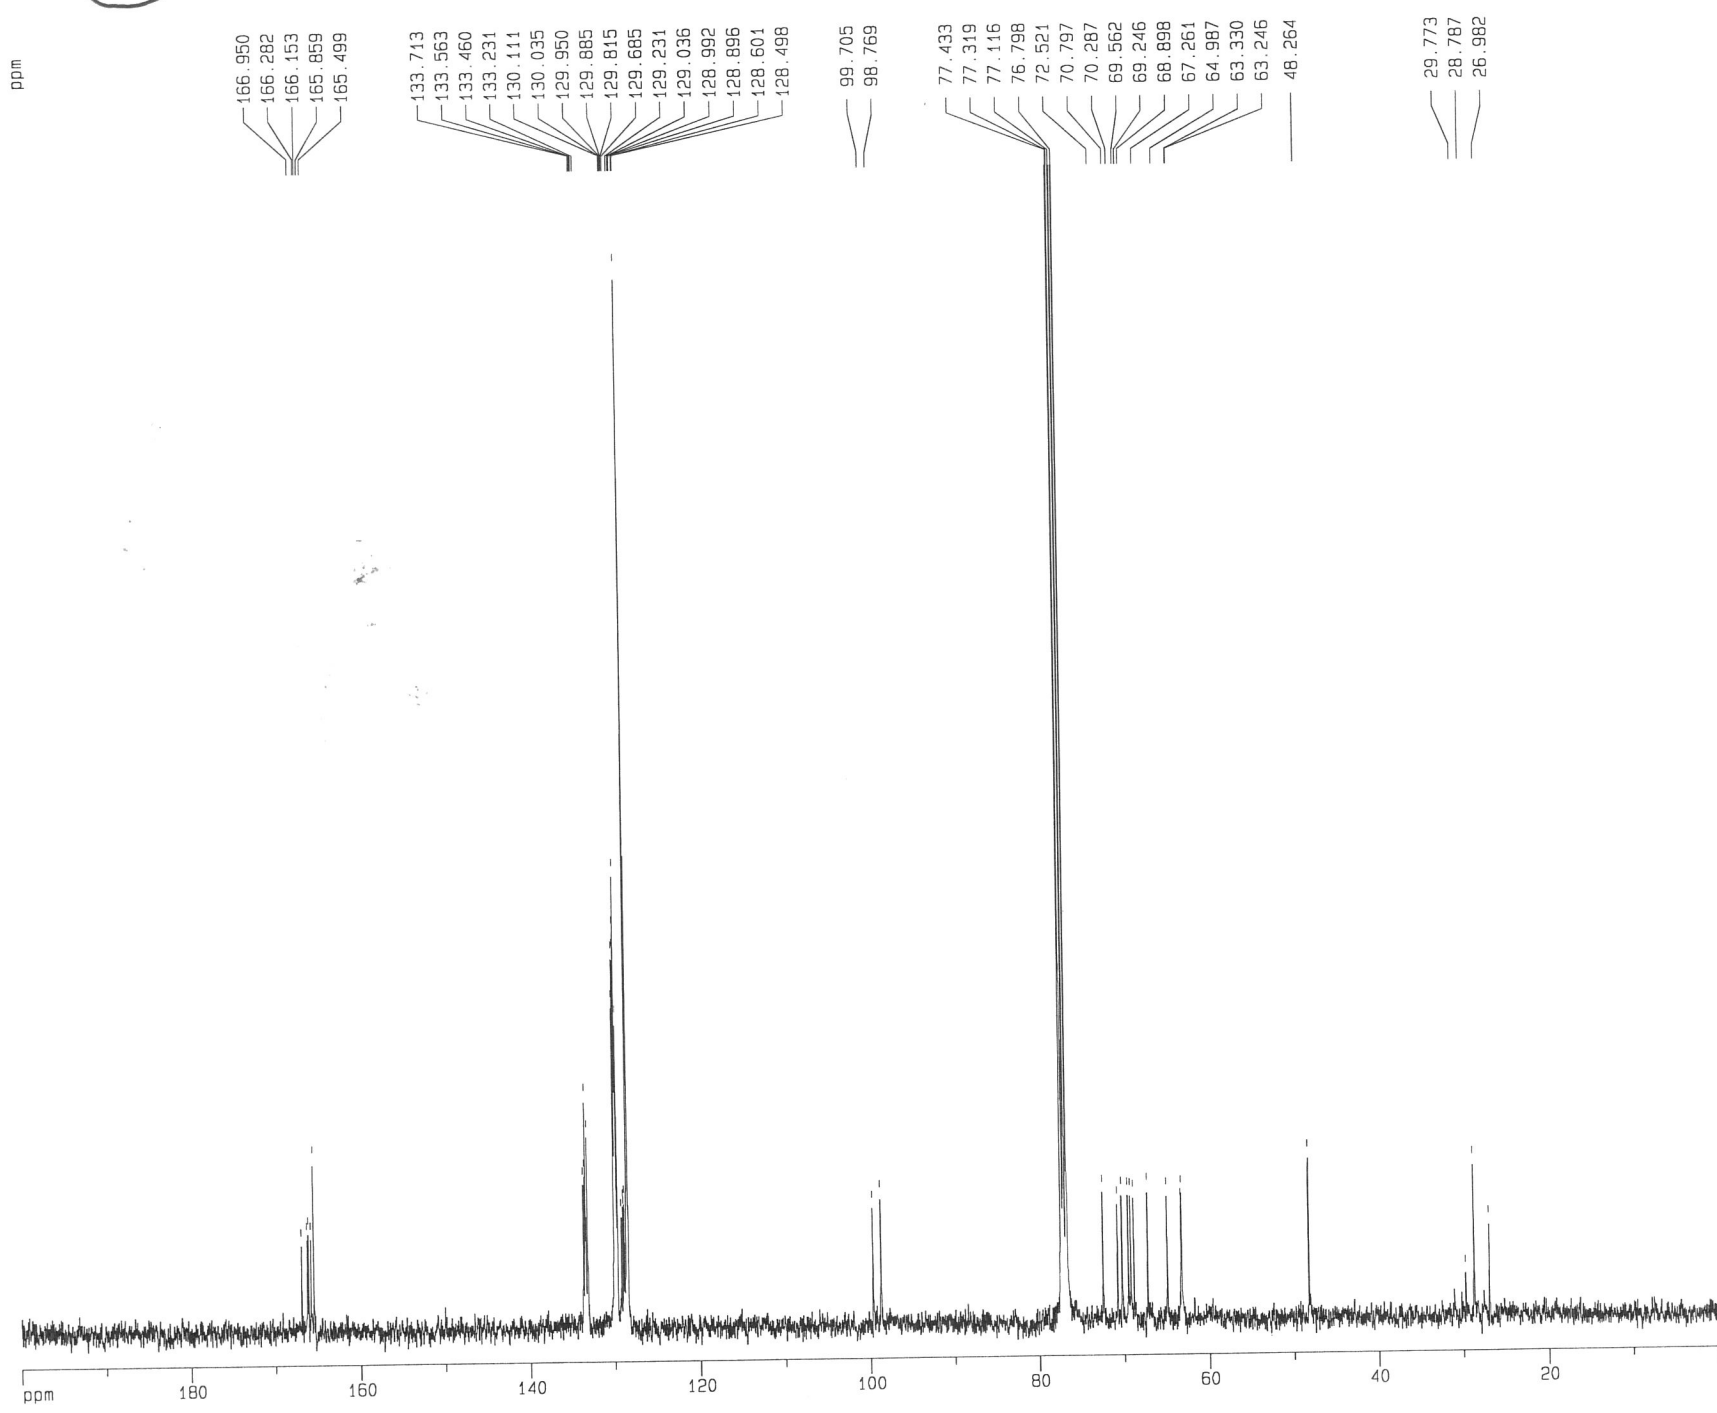

Current Data Parameters  
 NAME swmp0507  
 EXPNO 8  
 PROCNO 1

F2 - Acquisition Parameters  
 Date\_ 20110705  
 Time 17.07  
 INSTRUM spect  
 PROBHD 5 mm GNP 1H/1  
 PULPROG zgpg30  
 TD 65536  
 SOLVENT DMSO  
 NS 800  
 DS 0  
 SWH 25000.000 Hz  
 FIDRES 0.381470 Hz  
 AQ 1.3107700 sec  
 RG 6502  
 DW 20.000 usec  
 DE 25.00 usec  
 TE 300.0 K  
 D1 2.00000000 sec  
 D11 0.03000000 sec  
 D12 0.00002000 sec

==== CHANNEL f1 =====  
 NUC1 13C  
 P1 7.50 usec  
 PL1 -6.00 dB  
 SFO1 100.6237964 MHz

==== CHANNEL f2 =====  
 CPDPRG2 waltz16  
 NUC2 1H  
 PCPD2 100.00 usec  
 PL2 120.00 dB  
 PL12 20.00 dB  
 PL13 26.00 dB  
 SFO2 400.1316005 MHz

F2 - Processing parameters  
 SI 32768  
 SF 100.6127631 MHz  
 WDW EM  
 SSB 0  
 LB 3.00 Hz  
 GB 0  
 PC 1.00

1D NMR plot parameters  
 CX 22.50 cm  
 F1P 200.000 ppm  
 F1 20122.55 Hz  
 F2P 0.000 ppm  
 F2 0.00 Hz  
 PPMCM 8.88889 ppm/cm  
 HZCM 894.33569 Hz/cm

11b

MP 1/32 A2

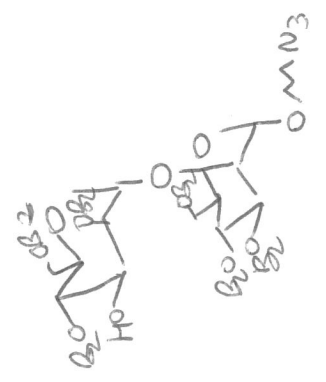

MP1/32 A2

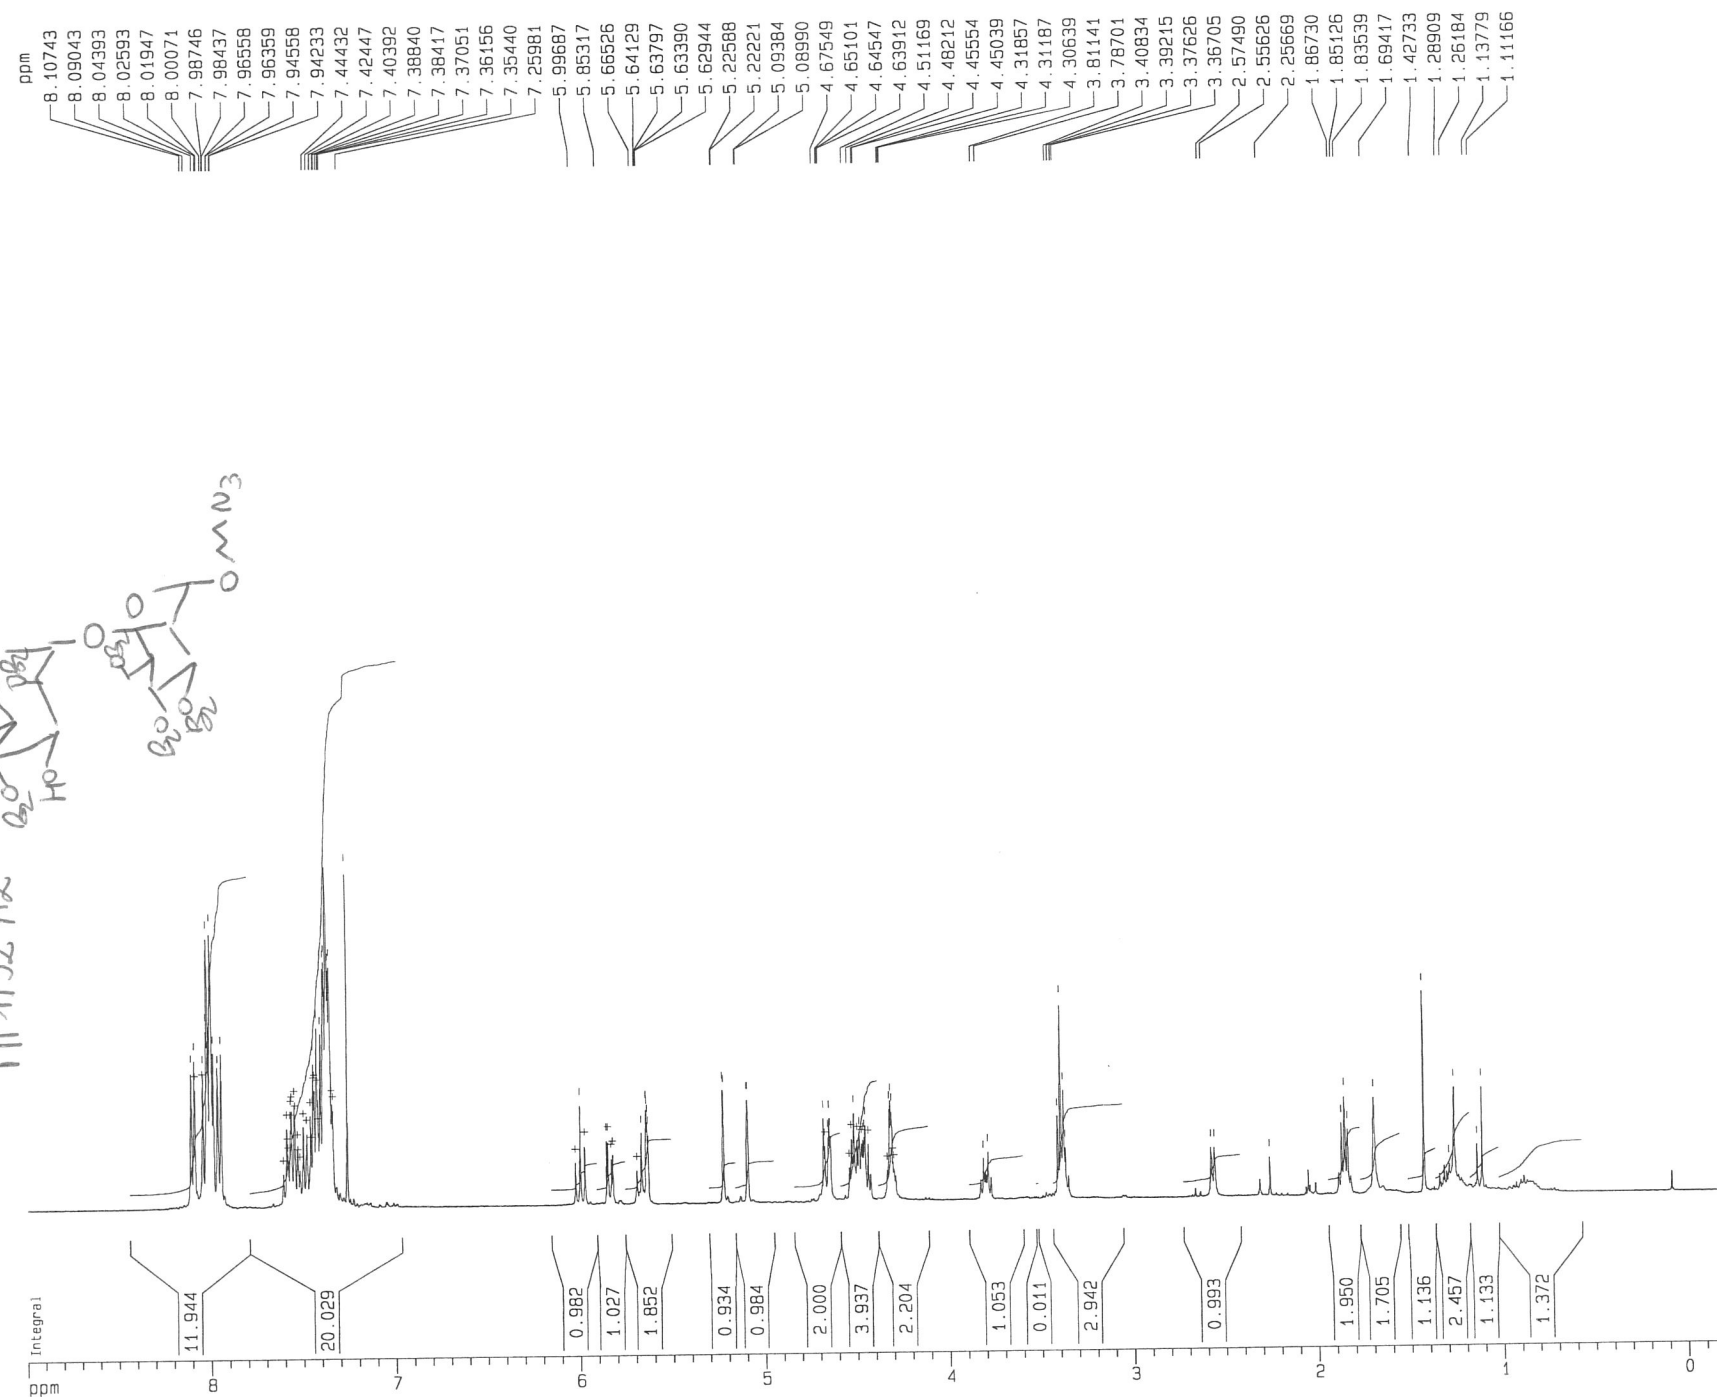

Current Data Parameters  
 NAME swmp0507  
 EXPNO 7  
 PROCNO 1

F2 - Acquisition Parameters  
 Date\_ 20110705  
 Time 16.20  
 INSTRUM spect  
 PROBHD 5 mm GNP 1H/1  
 PULPROG zg30  
 TD 32768  
 SOLVENT CDCl3  
 NS 16  
 DS 0  
 SWH 6410.256 Hz  
 FIDRES 0.195625 Hz  
 AQ 2.5559540 sec  
 RG 90.5  
 DW 78.000 usec  
 DE 6.00 usec  
 TE 300.0 K  
 D1 0.00000000 sec

==== CHANNEL f1 =====  
 NUC1 1H  
 P1 9.00 usec  
 PL1 0.00 dB  
 SFO1 400.1324008 MHz

F2 - Processing parameters  
 SI 16384  
 SF 400.1300095 MHz  
 WDW no  
 SSB 0  
 LB 0.00 Hz  
 GB 0  
 PC 1.00

1D NMR plot parameters  
 CX 22.50 cm  
 F1P 9.000 ppm  
 F1 3601.17 Hz  
 F2P -0.200 ppm  
 F2 -80.03 Hz  
 PPMCM 0.40889 ppm/cm  
 HZCM 163.60870 Hz/cm

12

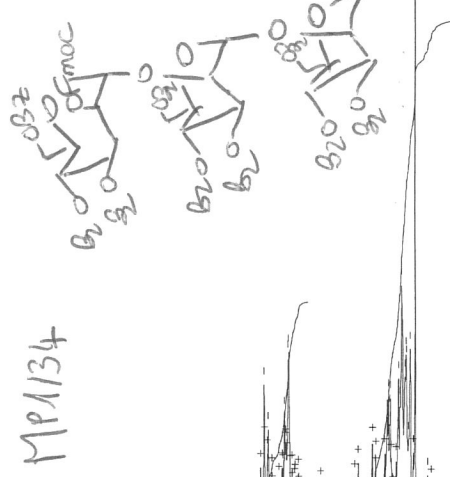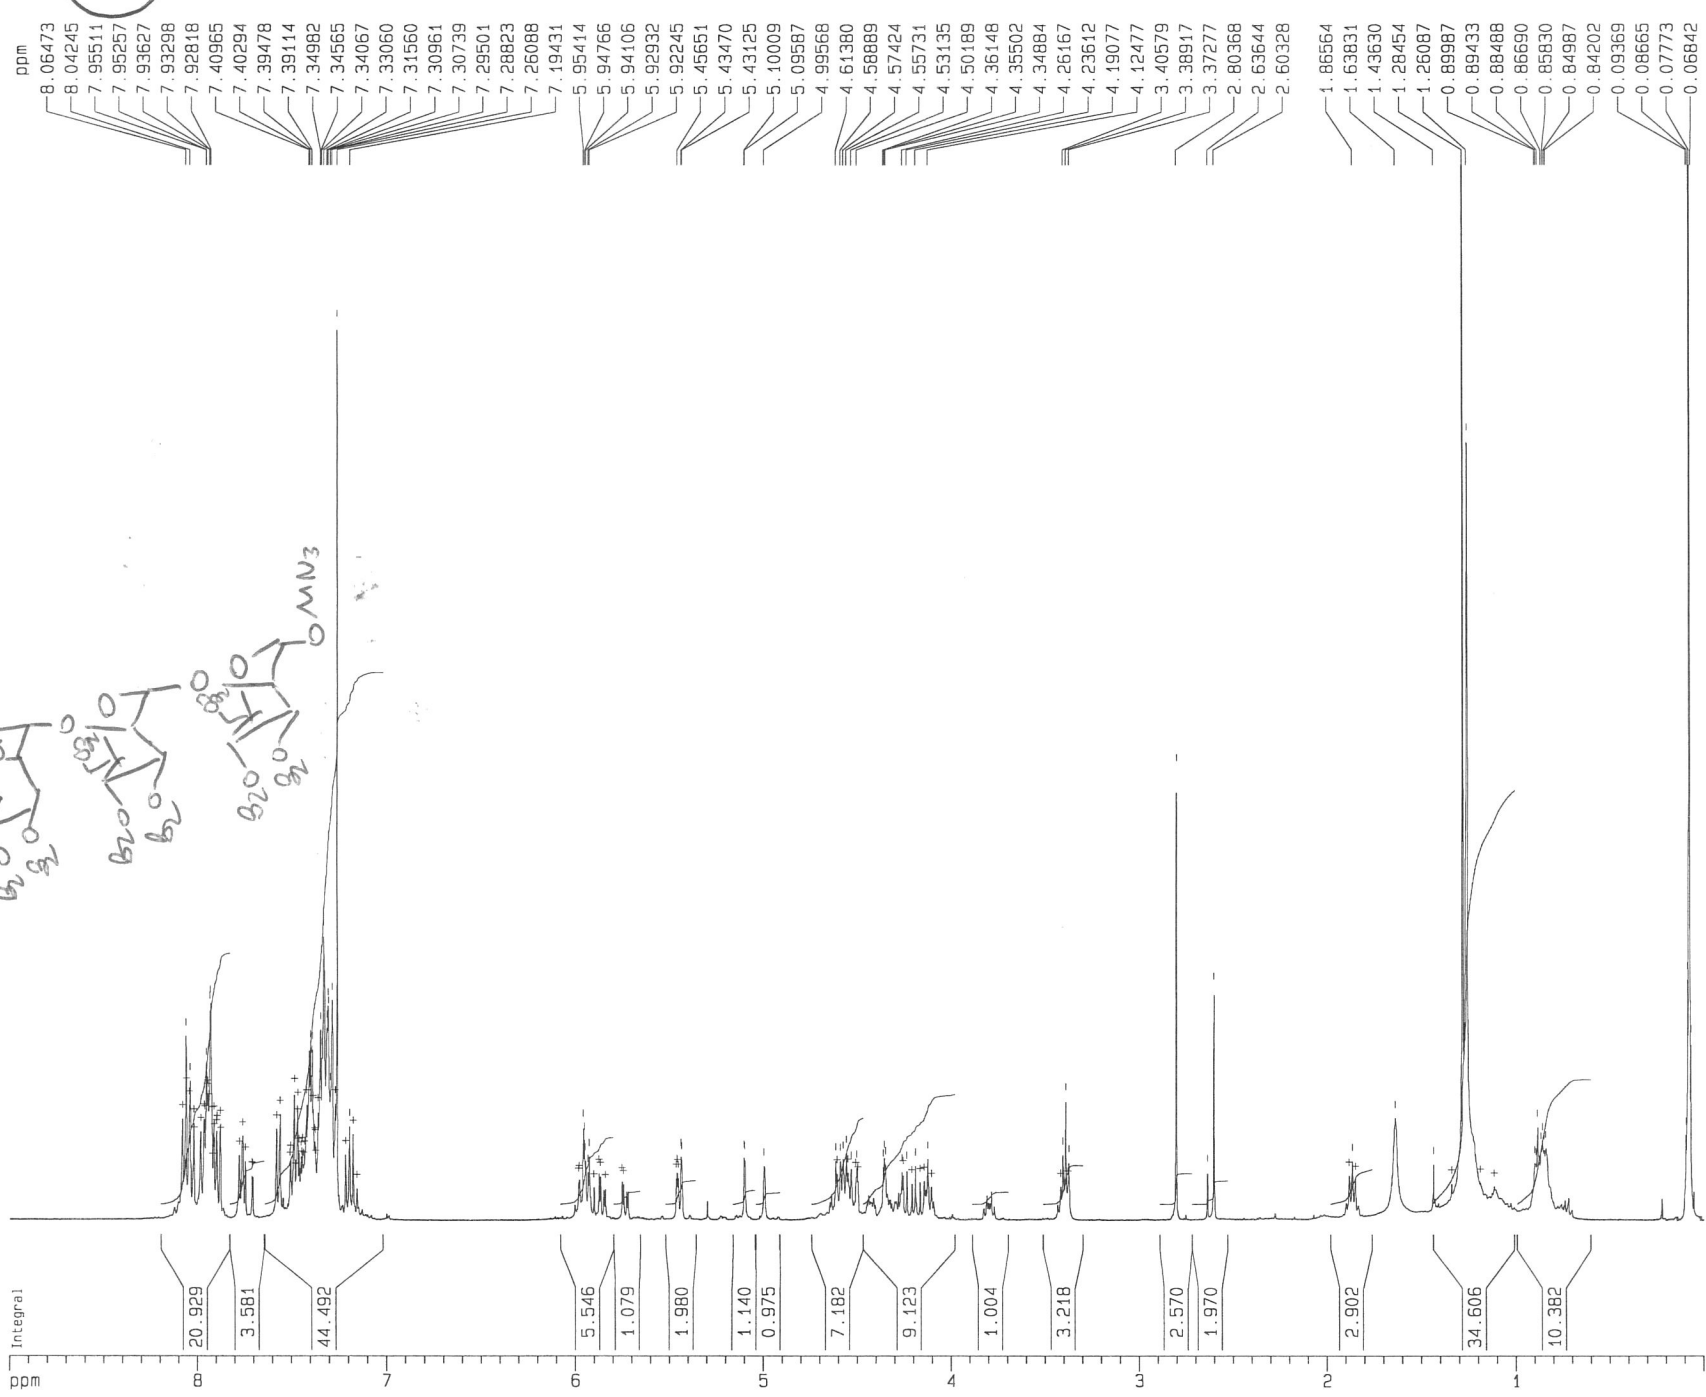

Current Data Parameters  
 NAME mrm1907  
 EXPNO 1  
 PROCNO 1

F2 - Acquisition Parameters  
 Date\_ 20110719  
 Time 12.29  
 INSTRUM spect  
 PROBHD 5 mm BBI 1H-B  
 PULPROG zg30  
 TD 32768  
 SOLVENT DMSO  
 NS 16  
 DS 0  
 SWH 6410.256 Hz  
 FIDRES 0.195625 Hz  
 AQ 2.5559540 sec  
 RG 90.5  
 DW 78.000 usec  
 DE 6.00 usec  
 TE 300.0 K  
 D1 0.0000000 sec

===== CHANNEL f1 =====  
 NUC1 1H  
 P1 7.00 usec  
 PL1 0.00 dB  
 SF01 400.1324008 MHz

F2 - Processing parameters  
 SI 16384  
 SF 400.1300092 MHz  
 WDW no  
 SSB 0  
 LB 0.00 Hz  
 GB 0  
 PC 1.00

1D NMR plot parameters  
 CX 22.50 cm  
 F1P 9.000 ppm  
 F1 3601.17 Hz  
 F2P 0.000 ppm  
 F2 0.00 Hz  
 PPMCM 0.40000 ppm/cm  
 HZCM 160.05200 Hz/cm

12

mp1/34

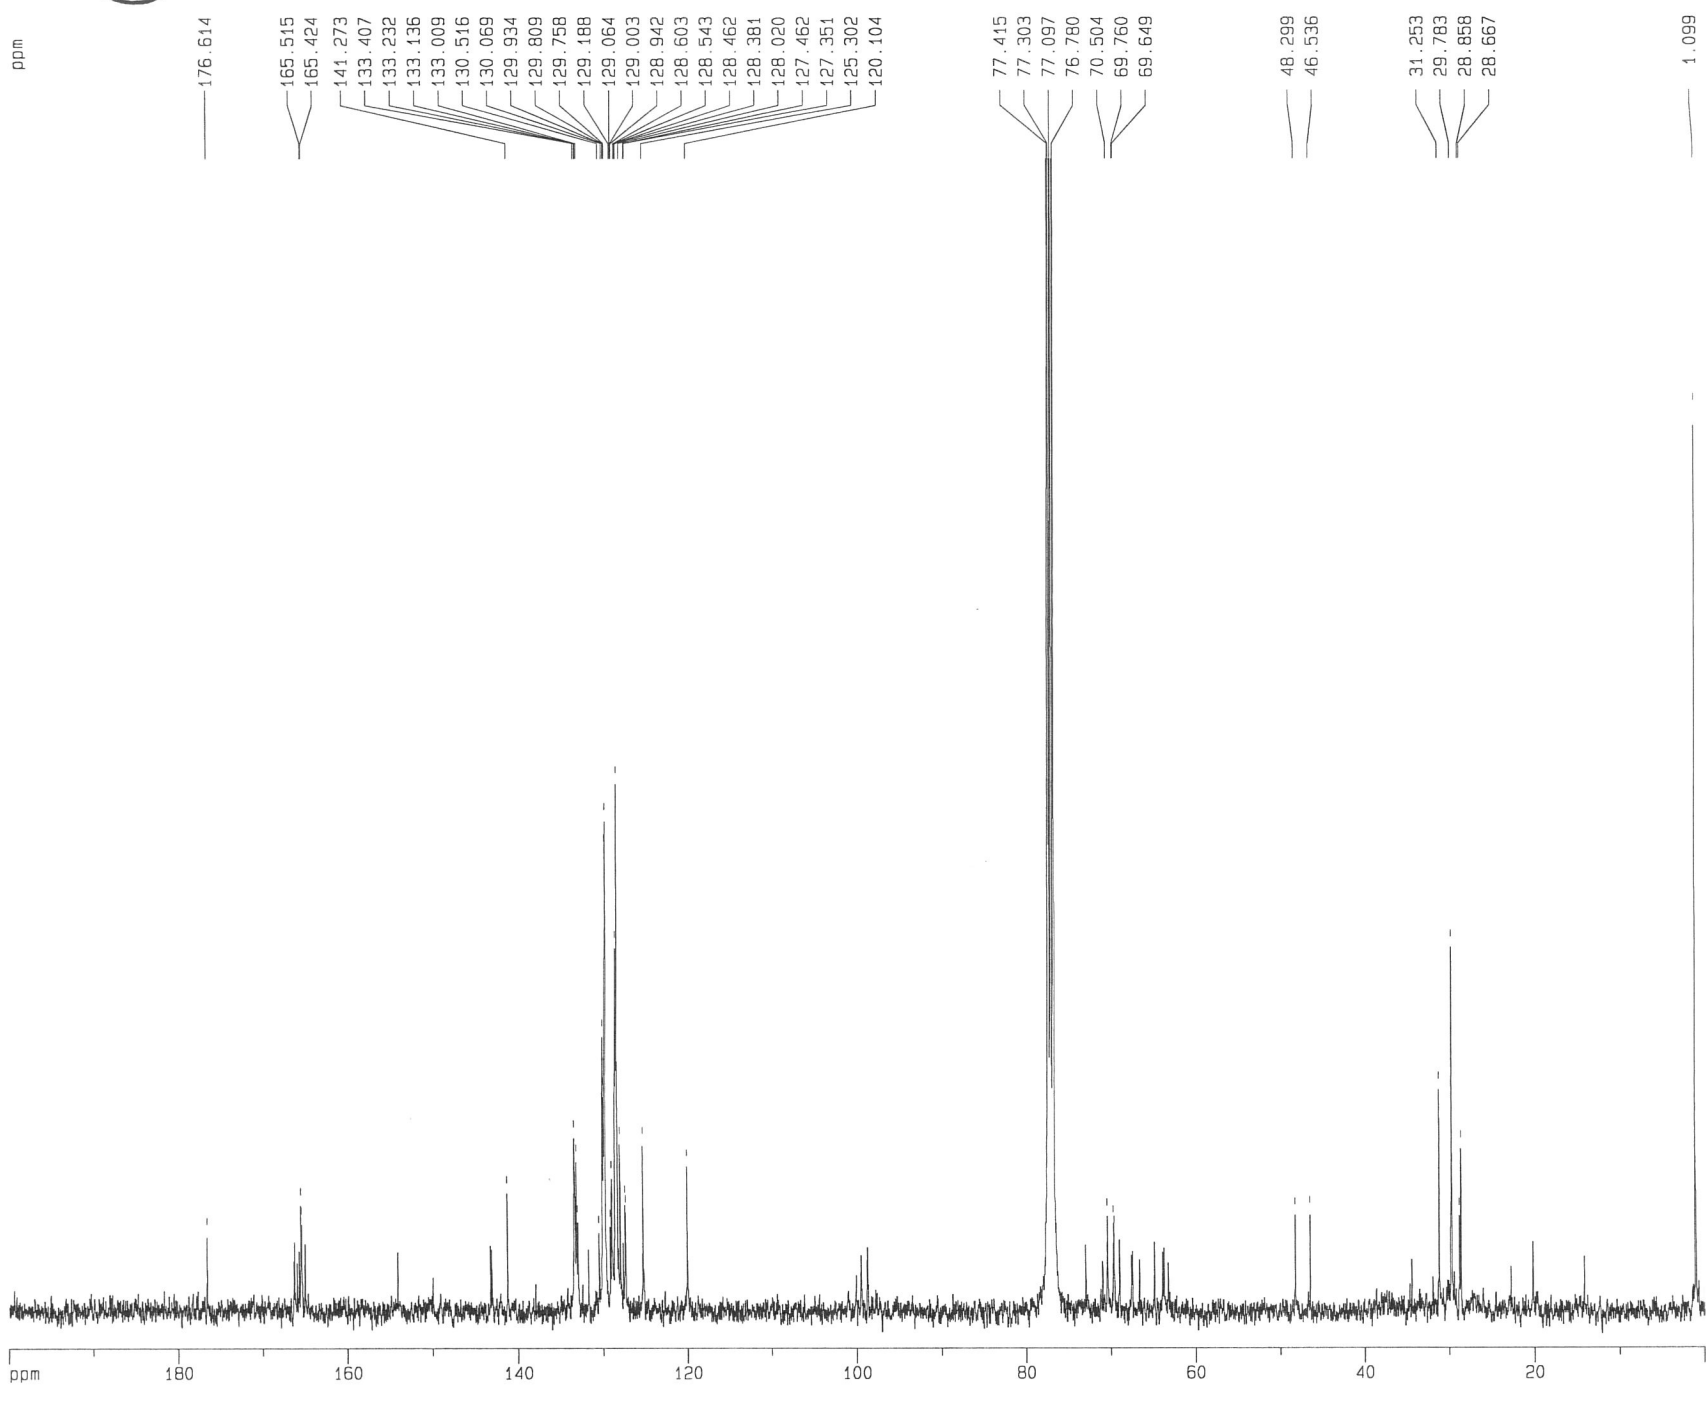

Current Data Parameters  
 NAME mrm1907  
 EXPNO 7  
 PROCNO 1

F2 - Acquisition Parameters  
 Date\_ 20110722  
 Time 17.10  
 INSTRUM spect  
 PROBHD 5 mm QNP 1H/1  
 PULPROG zgpg30  
 TD 65536  
 SOLVENT DMSO  
 NS 4200  
 DS 0  
 SWH 25000.000 Hz  
 FIDRES 0.381470 Hz  
 AQ 1.3107700 sec  
 RG 13004  
 DW 20.000 usec  
 DE 25.00 usec  
 TE 300.0 K  
 D1 2.0000000 sec  
 D11 0.0300000 sec  
 D12 0.0000200 sec

===== CHANNEL f1 =====  
 NUC1 13C  
 PL1 -6.00 dB  
 SF01 100.6237964 MHz

===== CHANNEL f2 =====  
 CPDPRG2 waltz16  
 NUC2 1H  
 PCPD2 100.00 usec  
 PL2 120.00 dB  
 PL12 20.00 dB  
 PL13 26.00 dB  
 SF02 400.1316005 MHz

F2 - Processing parameters  
 SI 32768  
 SF 100.6127631 MHz  
 WDW EM  
 SSB 0  
 LB 3.00 Hz  
 GB 0  
 PC 1.00

1D NMR plot parameters  
 CX 22.50 cm  
 F1P 200.000 ppm  
 F1 20122.55 Hz  
 F2P 0.000 ppm  
 F2 0.00 Hz  
 PPMCM 8.88889 ppm/cm  
 HZCM 894.33569 Hz/cm



16

MP2/67

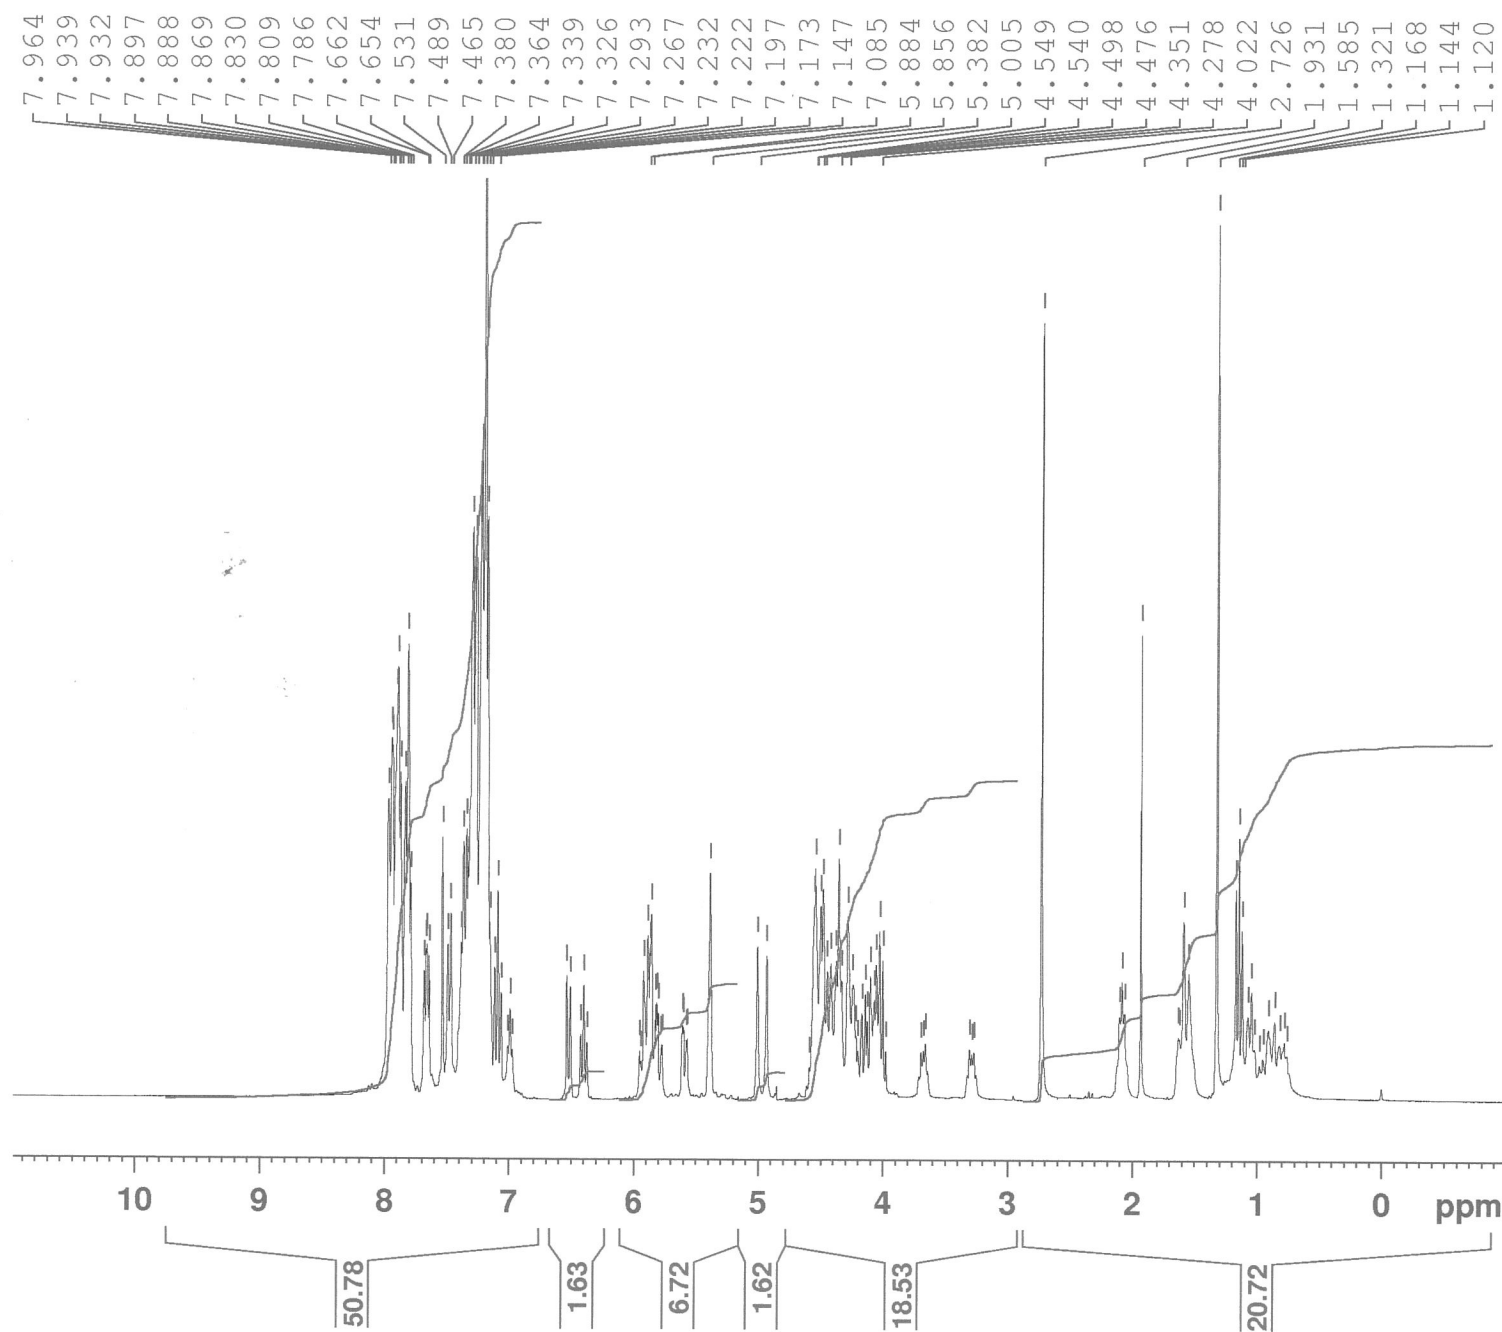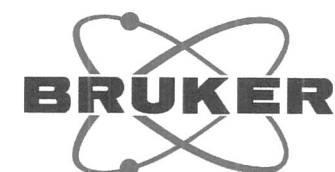

Current Data Parameters  
NAME Oct19-2012-JMM  
EXPNO 170  
PROCNO 1

F2 - Acquisition Parameters  
Date\_ 20121019  
Time 19.36  
INSTRUM spect  
PROBHD 5 mm PABBO BB-  
PULPROG zg30  
TD 43268  
SOLVENT CDCl3  
NS 32  
DS 2  
SWH 6009.615 Hz  
FIDRES 0.138893 Hz  
AQ 3.5998976 sec  
RG 28.5  
DW 83.200 usec  
DE 6.50 usec  
TE 296.4 K  
D1 1.00000000 sec  
TD0 1

==== CHANNEL f1 =====  
SFO1 300.1815009 MHz  
NUC1 1H  
P1 13.60 usec  
PLW1 7.00000000 W

F2 - Processing parameters  
SI 65536  
SF 300.1800442 MHz  
WDW EM  
SSB 0  
LB 0.30 Hz  
GB 0  
PC 1.00

16

MP2/67

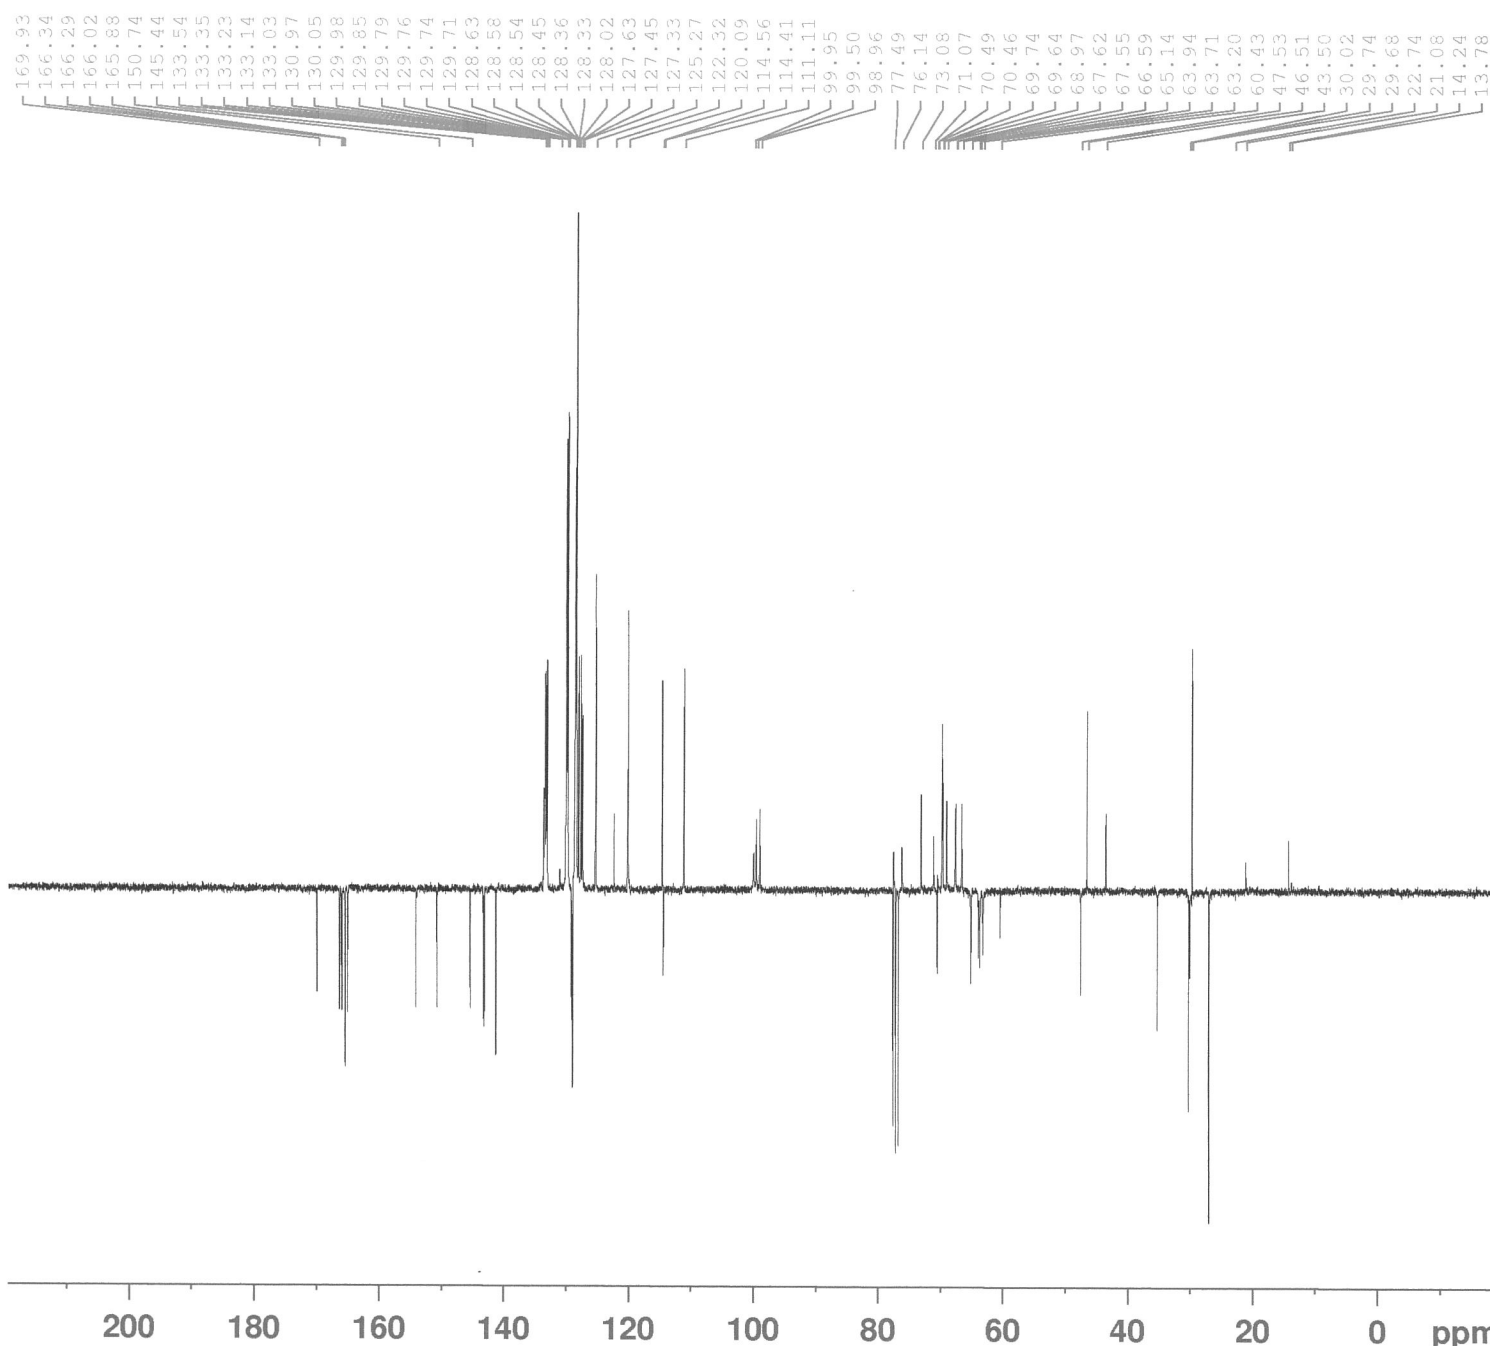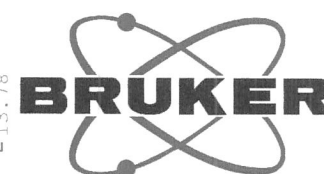

Current Data Parameters  
NAME Oct19-2012-JMM  
EXPNO 175  
PROCNO 1

F2 - Acquisition Parameters  
Date\_ 20121020  
Time 3.36  
INSTRUM spect  
PROBHD 5 mm PABBO BB-  
PULPROG jmod  
TD 65536  
SOLVENT CDCl3  
NS 2000  
DS 4  
SWH 18028.846 Hz  
FIDRES 0.275098 Hz  
AQ 1.8175317 sec  
RG 2050  
DW 27.733 usec  
DE 6.50 usec  
TE 297.6 K  
CNST2 145.0000000  
CNST11 1.0000000  
D1 2.00000000 sec  
D20 0.00689655 sec  
TD0 1

==== CHANNEL f1 =====  
SFO1 75.4878691 MHz  
NUC1 13C  
P1 9.00 usec  
P2 18.00 usec  
PLW1 38.00000000 W

==== CHANNEL f2 =====  
SFO2 300.1812007 MHz  
NUC2 1H  
CPDPRG[2] waltz16  
PCPD2 100.00 usec  
PLW2 7.00000000 W  
PLW12 0.13964000 W

F2 - Processing parameters  
SI 32768  
SF 75.4803210 MHz  
WDW EM  
SSB 0  
LB 1.00 Hz  
GB 0  
PC 1.40



MP1/104

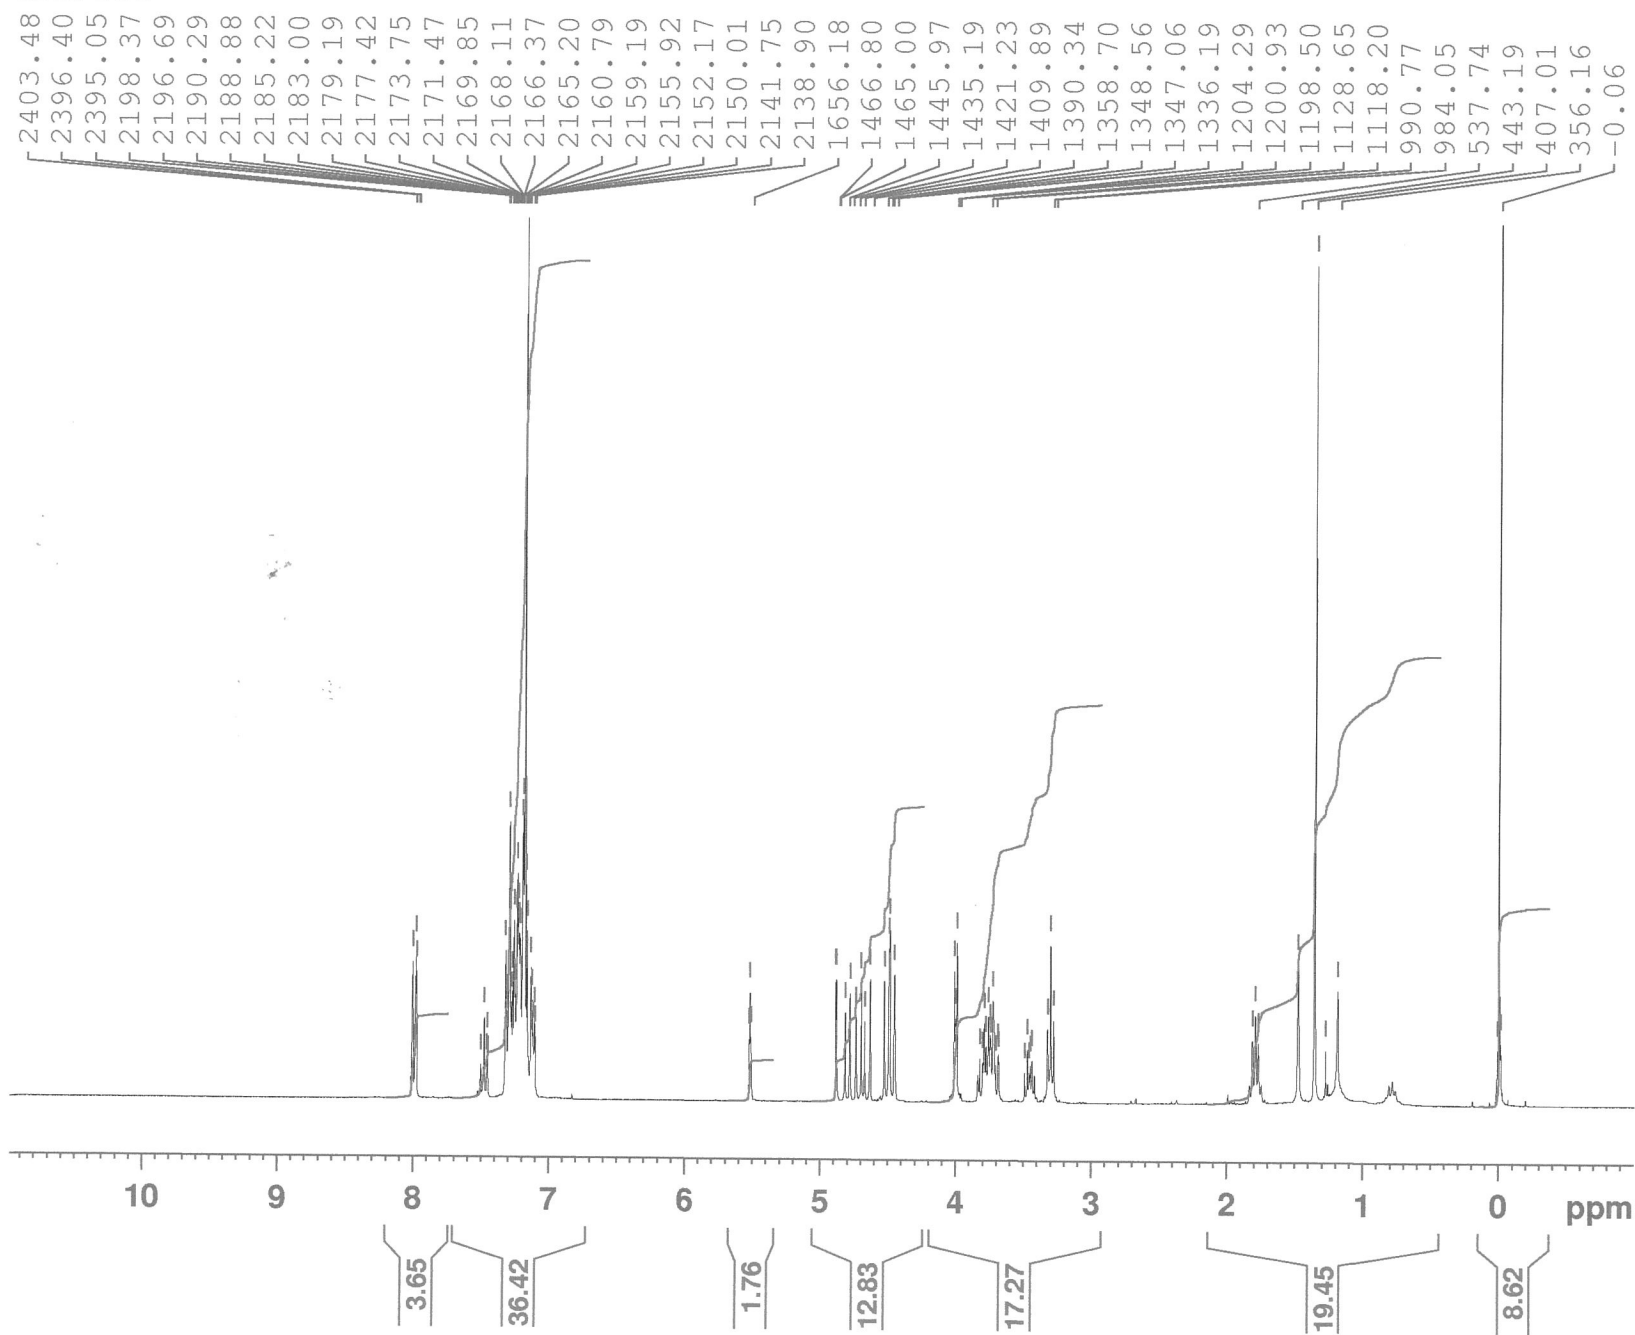

**BRUKER**

Current Data Parameters  
 NAME Nov22-2011-JMM  
 EXPNO 100  
 PROCNO 1

F2 - Acquisition Parameters  
 Date\_ 20111122  
 Time 16.59  
 INSTRUM spect  
 PROBHD 5 mm PABBO BB-  
 PULPROG zg30  
 TD 43268  
 SOLVENT CDC13  
 NS 32  
 DS 2  
 SWH 6009.615 Hz  
 FIDRES 0.138893 Hz  
 AQ 3.5999477 sec  
 RG 161  
 DW 83.200 use  
 DE 6.50 use  
 TE 300.0 K  
 D1 1.00000000 sec  
 TD0 1

===== CHANNEL f1 =====  
 NUC1 1H  
 P1 13.60 use  
 PLW1 7.0000000 W  
 SFO1 300.1815009 MHz

F2 - Processing parameters  
 SI 65536  
 SF 300.1800338 MHz  
 WDW EM  
 SSB 0  
 LB 0.30 Hz  
 GB 0  
 PC 1.00

18

MP1/104

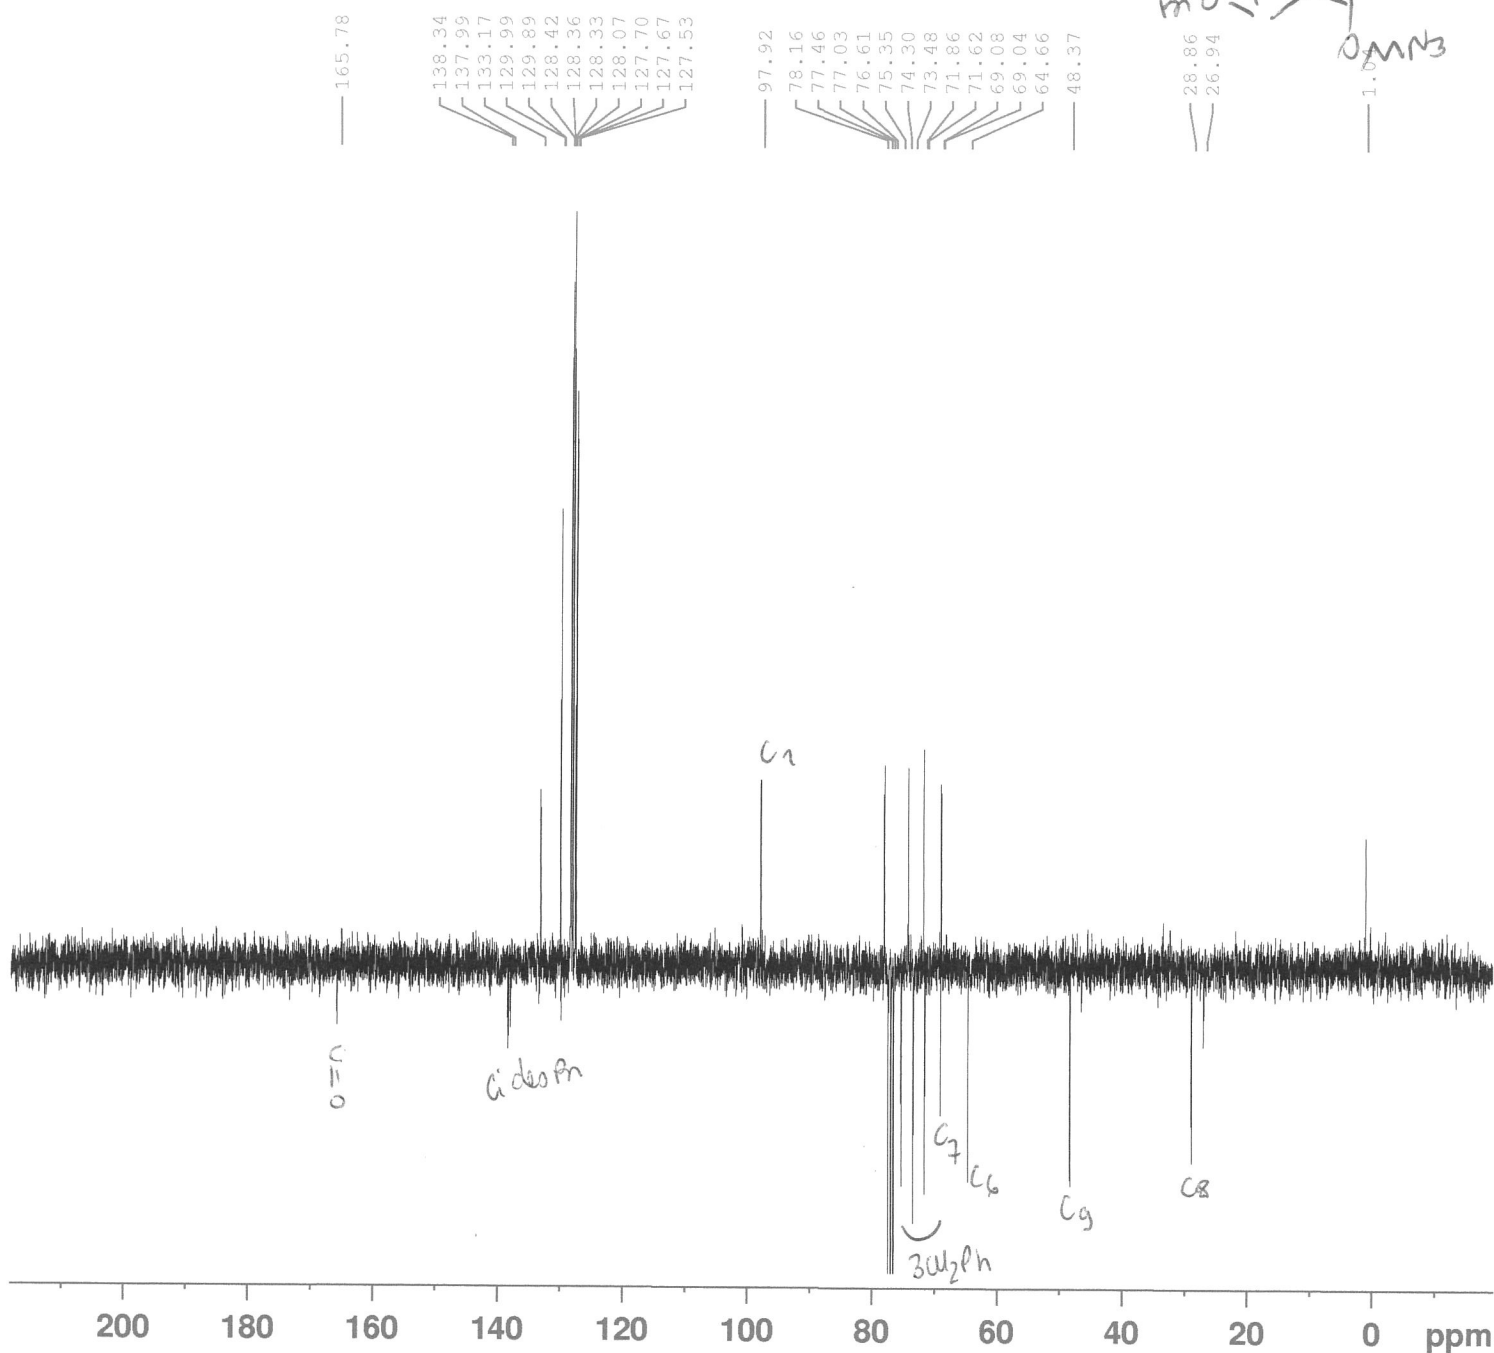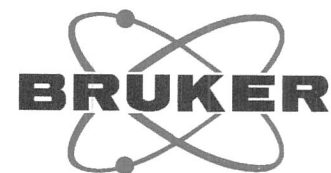

Current Data Parameters  
 NAME Nov22-2011-JMM  
 EXPNO 101  
 PROCNO 1

F2 - Acquisition Parameters  
 Date\_ 20111122  
 Time 17.18  
 INSTRUM spect  
 PROBHD 5 mm PABBO BB-  
 PULPROG jmod  
 TD 65536  
 SOLVENT CDC13  
 NS 256  
 DS 4  
 SWH 18028.846 Hz  
 FIDRES 0.275098 Hz  
 AQ 1.8175818 sec  
 RG 2050  
 DW 27.733 usec  
 DE 6.50 usec  
 TE 300.0 K  
 CNST2 145.0000000  
 CNST11 1.0000000  
 D1 2.00000000 sec  
 D20 0.00689655 sec  
 TD0 1

===== CHANNEL f1 =====  
 NUC1 13C  
 P1 9.00 usec  
 P2 18.00 usec  
 PLW1 38.00000000 W  
 SFO1 75.4878691 MHz

===== CHANNEL f2 =====  
 CPDPRG2 waltz16  
 NUC2 1H  
 PCPD2 100.00 usec  
 PLW2 7.00000000 W  
 PLW12 0.13964000 W  
 SFO2 300.1812007 MHz

F2 - Processing parameters  
 SI 32768  
 SF 75.4803210 MHz  
 WDW EM  
 SSB 0  
 LB 1.00 Hz  
 GB 0  
 PC 1.40

MP1/126

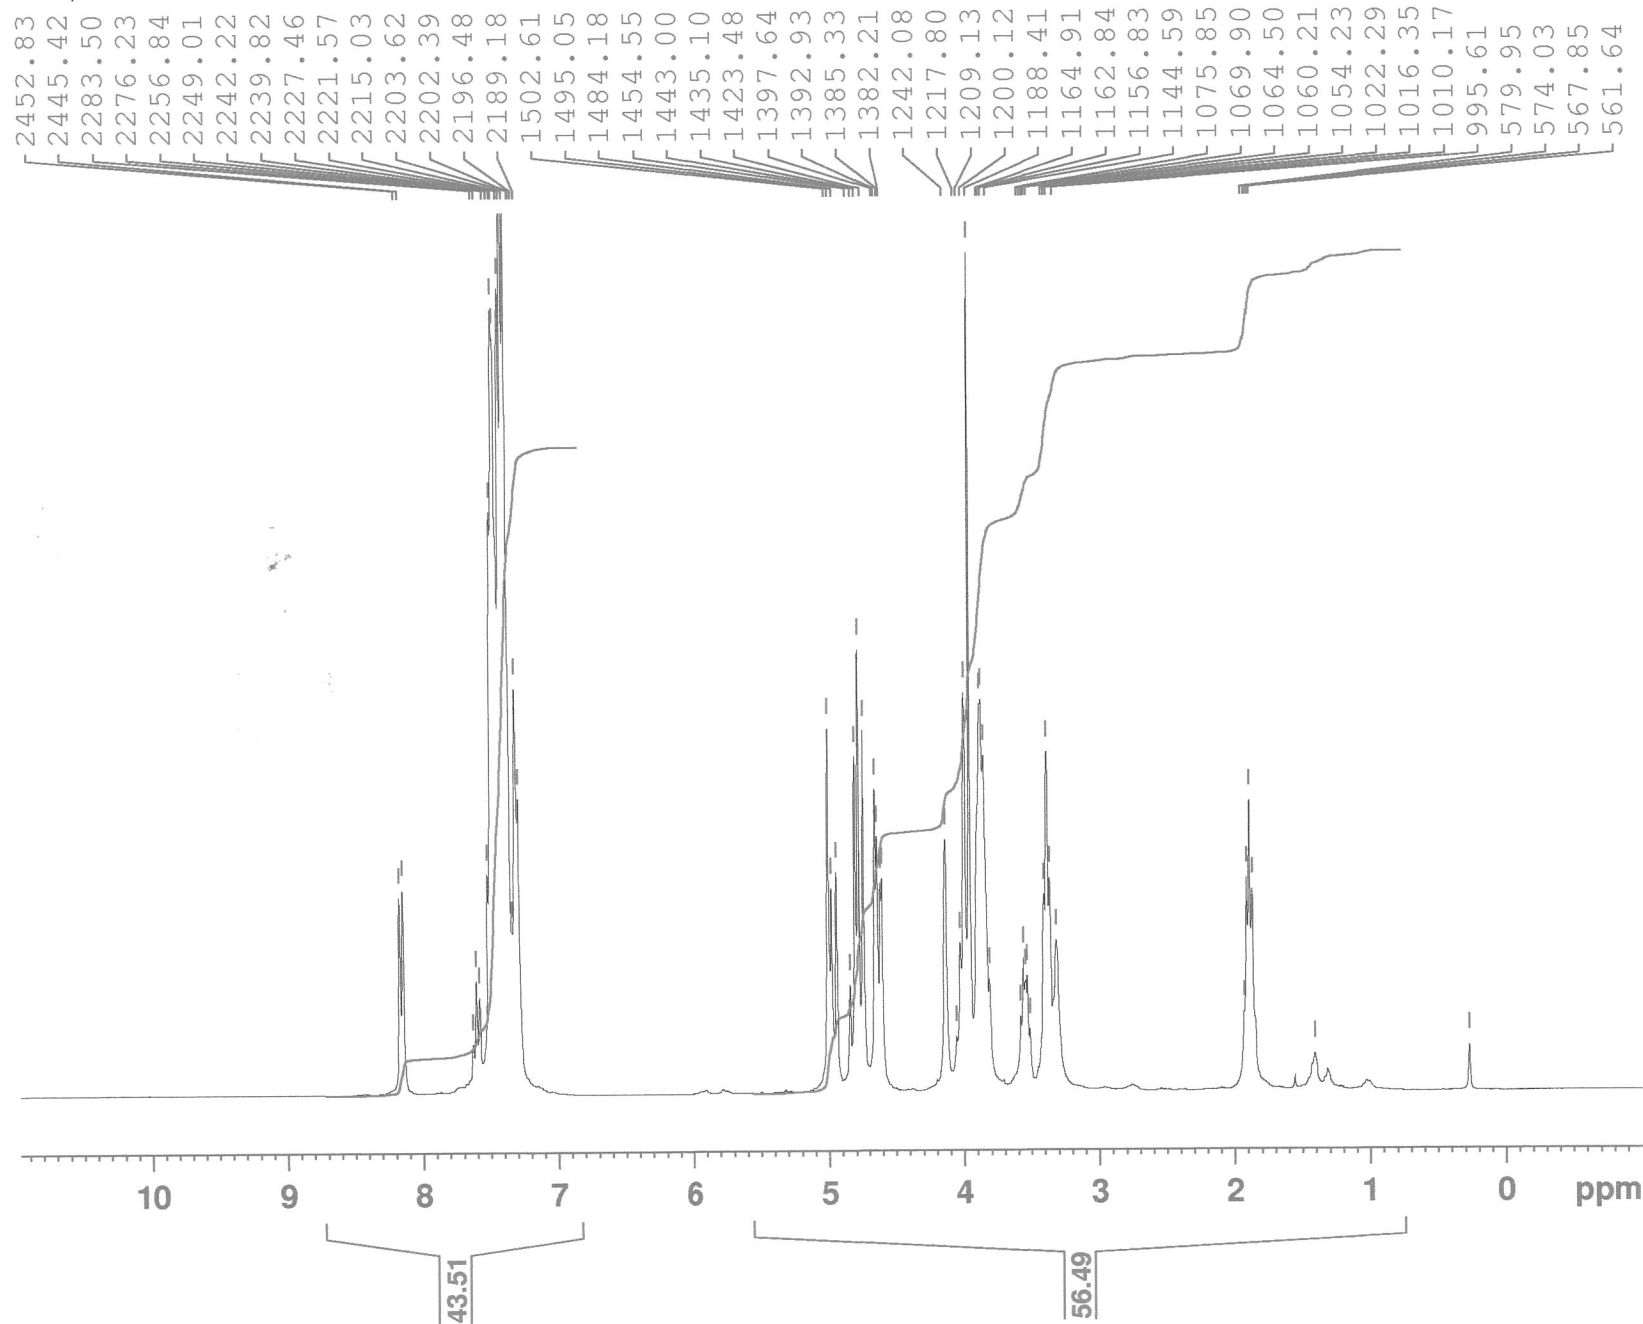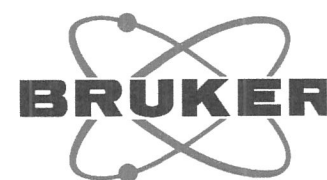

Current Data Parameters  
 NAME Jan12-2012-JMM  
 EXPNO 50  
 PROCNO 1

F2 - Acquisition Parameters  
 Date\_ 20120112  
 Time 11.39  
 INSTRUM spect  
 PROBHD 5 mm PABBO BB-  
 PULPROG zg30  
 TD 43268  
 SOLVENT CDC13  
 NS 32  
 DS 2  
 SWH 6009.615 Hz  
 FIDRES 0.138893 Hz  
 AQ 3.5999477 sec  
 RG 11.3  
 DW 83.200 usec  
 DE 6.50 usec  
 TE 294.4 K  
 D1 1.0000000 sec  
 TD0 1

==== CHANNEL f1 =====  
 NUC1 1H  
 P1 13.60 usec  
 PLW1 7.0000000 W  
 SFO1 300.1815009 MHz

F2 - Processing parameters  
 SI 65536  
 SF 300.1800000 MHz  
 WDW EM  
 SSB 0  
 LB 0.30 Hz  
 GB 0  
 PC 1.00

19

MP1/83

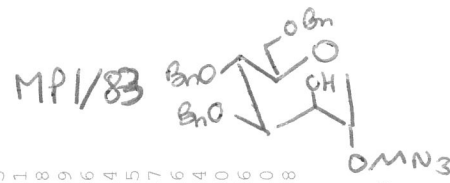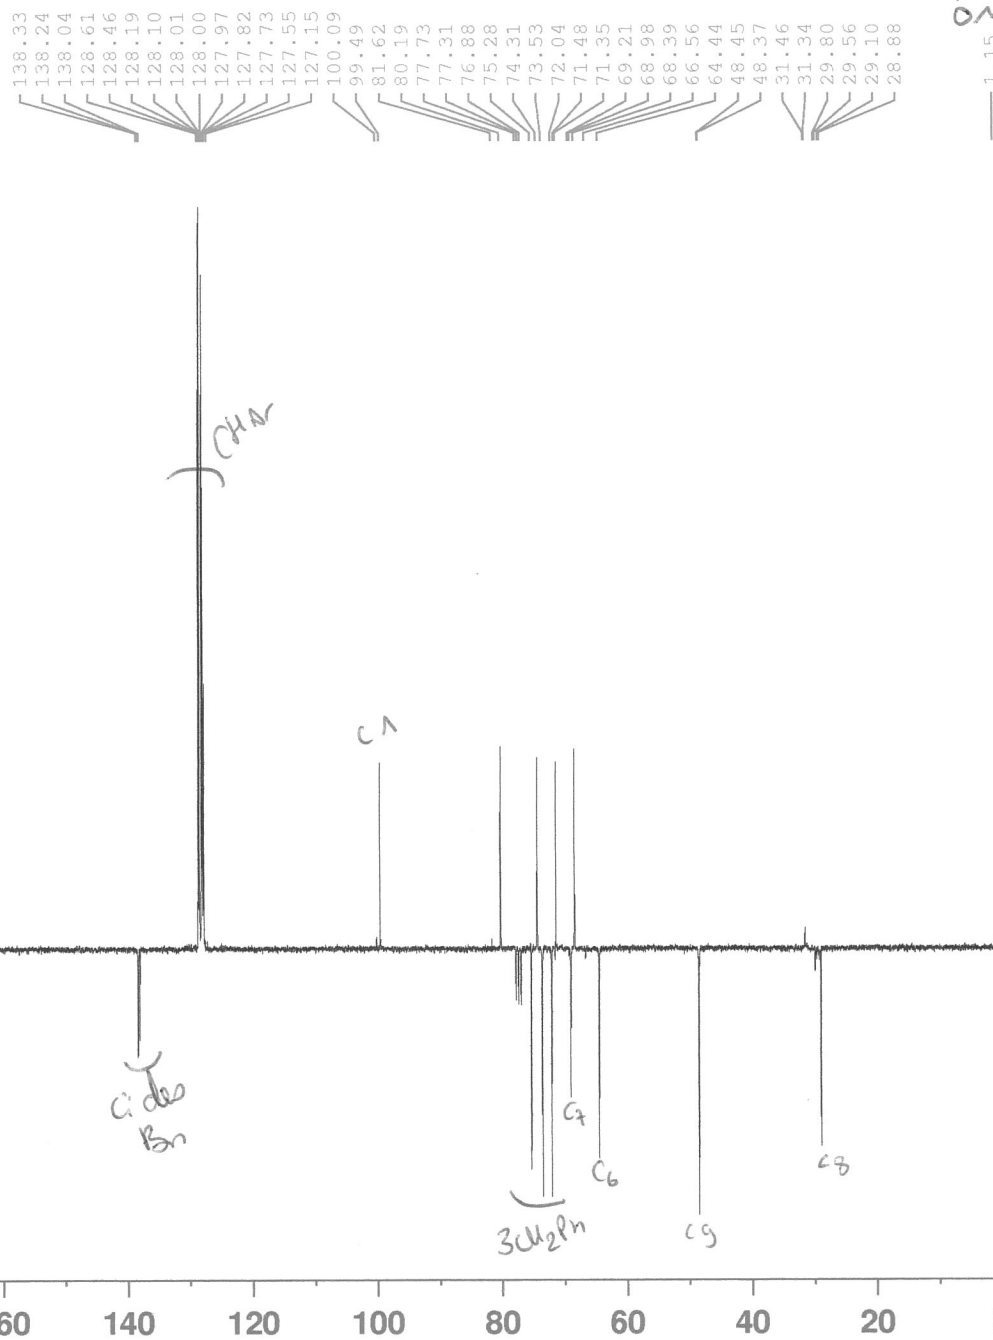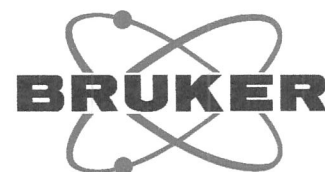

Current Data Parameters  
 NAME Oct14-2011-JMM  
 EXPNO 11  
 PROCNO 1

F2 - Acquisition Parameters  
 Date\_ 20111014  
 Time 10.23  
 INSTRUM spect  
 PROBHD 5 mm PABBO BB-  
 PULPROG jmod  
 TD 65536  
 SOLVENT CDC13  
 NS 100  
 DS 4  
 SWH 18028.846 Hz  
 FIDRES 0.275098 Hz  
 AQ 1.8175818 sec  
 RG 2050  
 DW 27.733 usec  
 DE 6.50 usec  
 TE 294.7 K  
 CNST2 145.0000000  
 CNST11 1.0000000  
 D1 2.0000000 sec  
 D20 0.00689655 sec  
 TD0 1

==== CHANNEL f1 =====  
 NUC1 13C  
 P1 9.00 usec  
 P2 18.00 usec  
 PLW1 38.0000000 W  
 SFO1 75.4878691 MHz

==== CHANNEL f2 =====  
 CPDPRG2 waltz16  
 NUC2 1H  
 PCPD2 100.00 usec  
 PLW2 7.0000000 W  
 PLW12 0.13964000 W  
 SFO2 300.1812007 MHz

F2 - Processing parameters  
 SI 32768  
 SF 75.4803210 MHz  
 WDW EM  
 SSB 0  
 LB 1.00 Hz  
 GB 0  
 PC 1.40





MP2/14

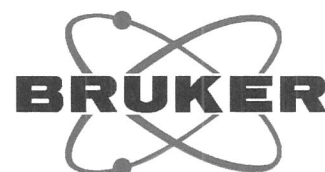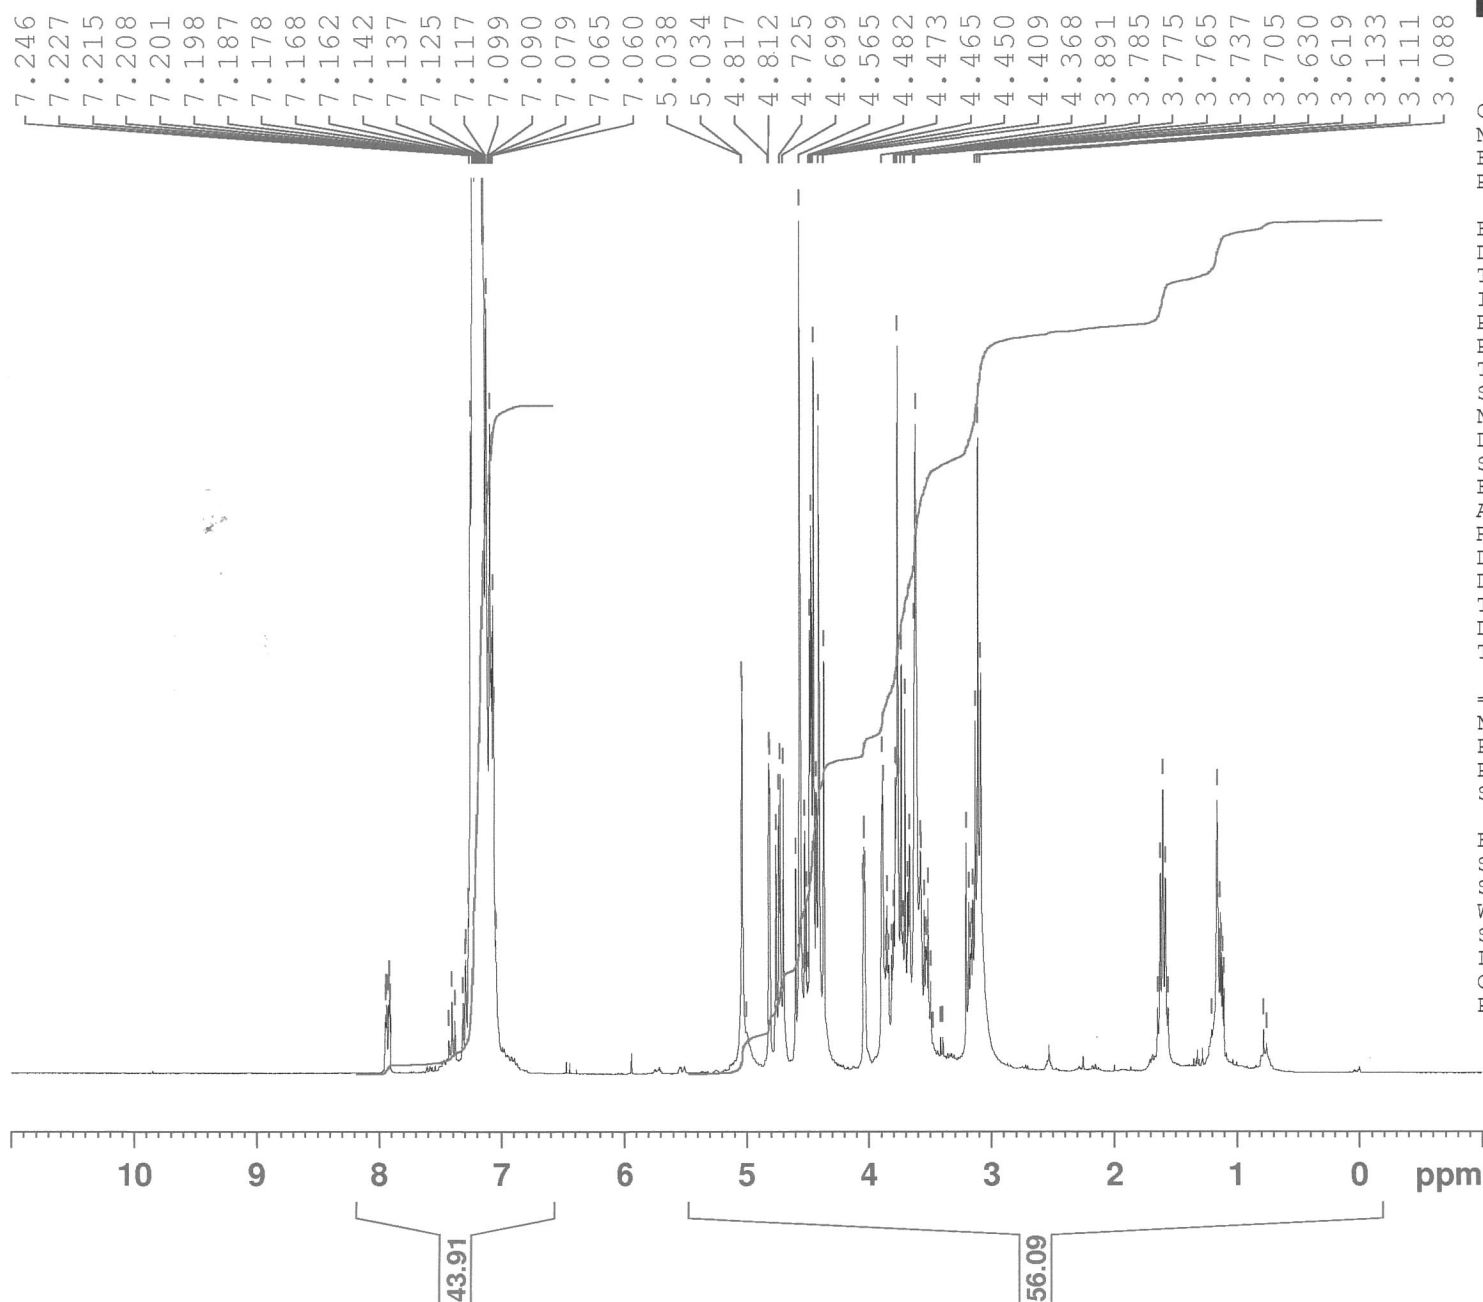

Current Data Parameters  
NAME May16-2012-JMM  
EXPNO 40  
PROCNO 1

F2 - Acquisition Parameters  
Date\_ 20120516  
Time 11.03  
INSTRUM spect  
PROBHD 5 mm PABBO BB-  
PULPROG zg30  
TD 43268  
SOLVENT CDC13  
NS 32  
DS 2  
SWH 6009.615 Hz  
FIDRES 0.138893 Hz  
AQ 3.5999477 sec  
RG 18  
DW 83.200 usec  
DE 6.50 usec  
TE 295.1 K  
D1 1.00000000 sec  
TDO 1

==== CHANNEL f1 =====  
NUC1 1H  
P1 13.60 usec  
PLW1 7.00000000 W  
SFO1 300.1815009 MHz

F2 - Processing parameters  
SI 65536  
SF 300.1800698 MHz  
WDW EM  
SSB 0  
LB 0.30 Hz  
GB 0  
PC 1.00

21

MP2/14

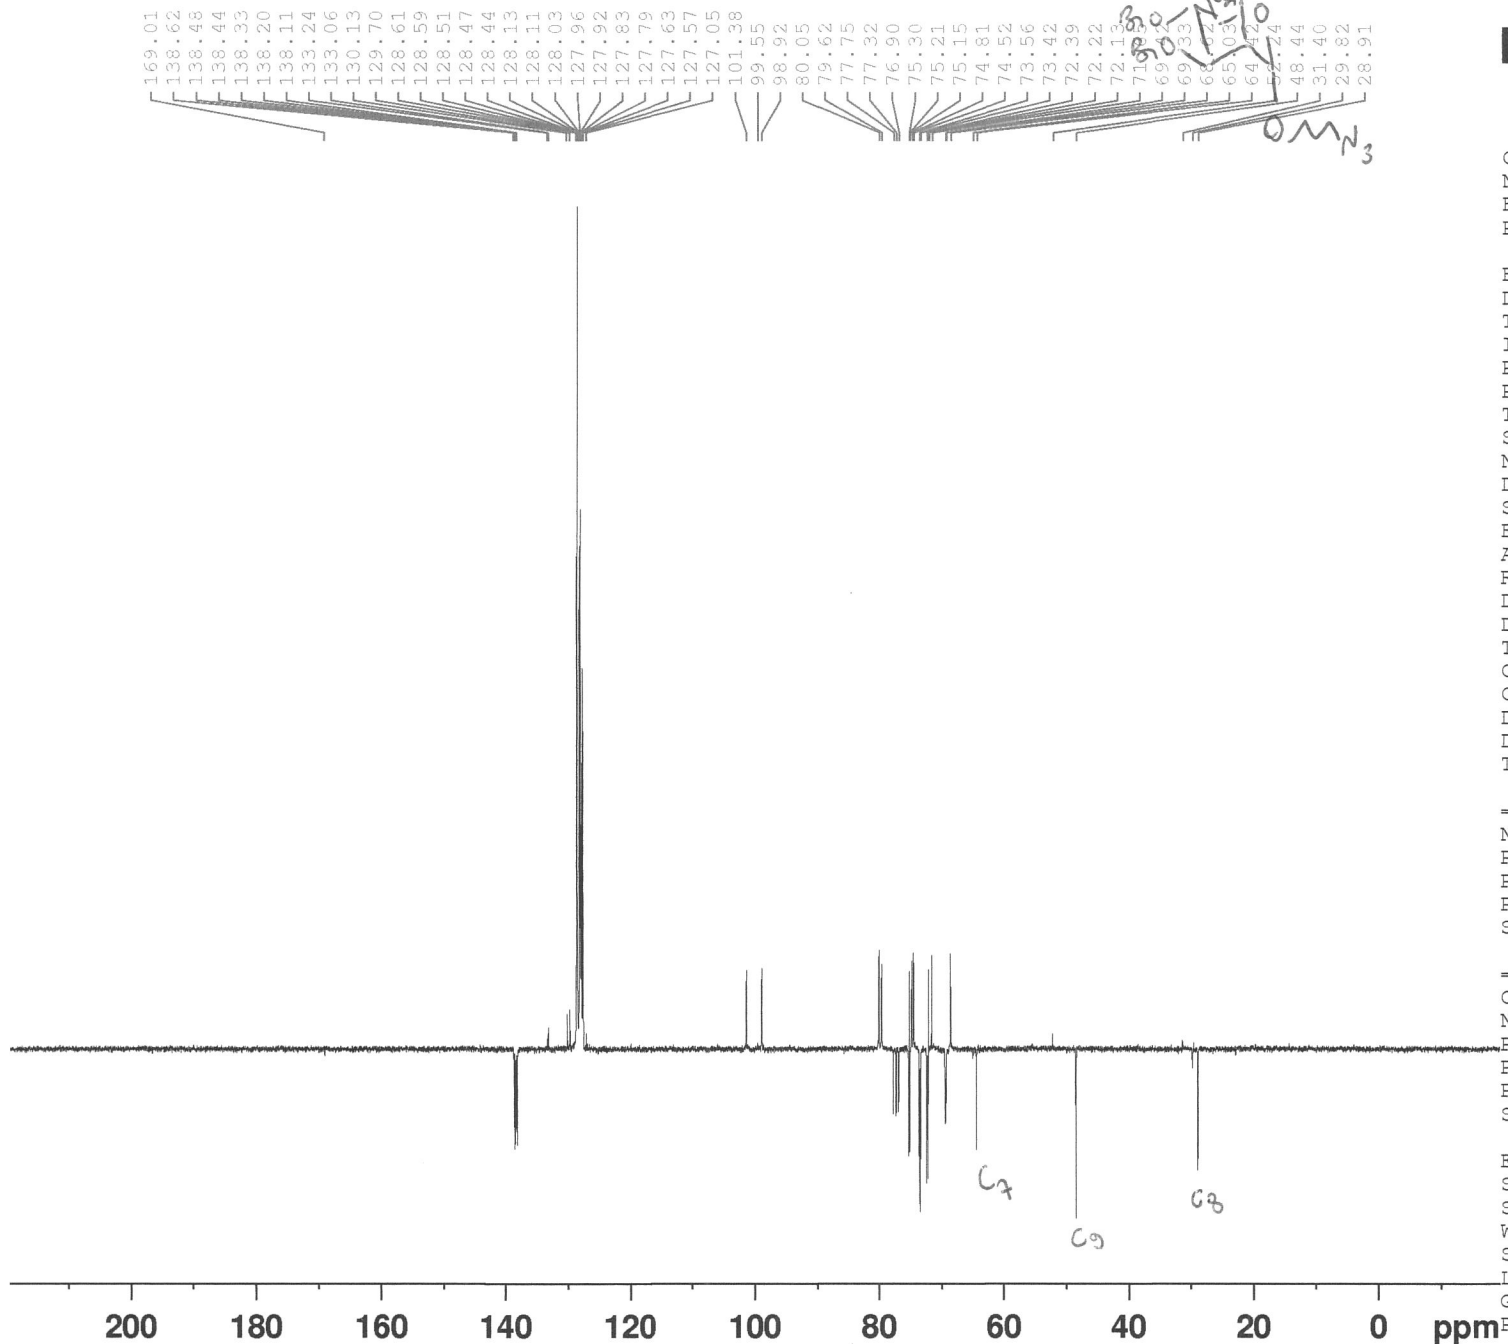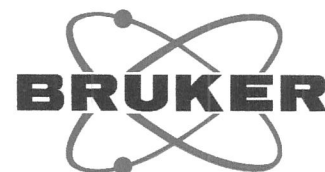

Current Data Parameters  
NAME May16-2012-JMM  
EXPNO 41  
PROCNO 1

F2 - Acquisition Parameters  
Date\_ 20120516  
Time 11.17  
INSTRUM spect  
PROBHD 5 mm PABBO BB-  
PULPROG jmod  
TD 65536  
SOLVENT CDC13  
NS 200  
DS 4  
SWH 18028.846 Hz  
FIDRES 0.275098 Hz  
AQ 1.8175818 sec  
RG 2050  
DW 27.733 usec  
DE 6.50 usec  
TE 295.6 K  
CNST2 145.0000000  
CNST11 1.0000000  
D1 2.00000000 sec  
D20 0.00689655 sec  
TDO 1

==== CHANNEL f1 =====  
NUC1 13C  
P1 9.00 usec  
P2 18.00 usec  
PLW1 38.00000000 W  
SFO1 75.4878691 MHz

==== CHANNEL f2 =====  
CPDPRG2 waltz16  
NUC2 1H  
PCPD2 100.00 usec  
PLW2 7.00000000 W  
PLW12 0.13964000 W  
SFO2 300.1812007 MHz

F2 - Processing parameters  
SI 32768  
SF 75.4803210 MHz  
WDW EM  
SSB 0  
LB 1.00 Hz  
GB 0  
PC 1.40



MP1/111A

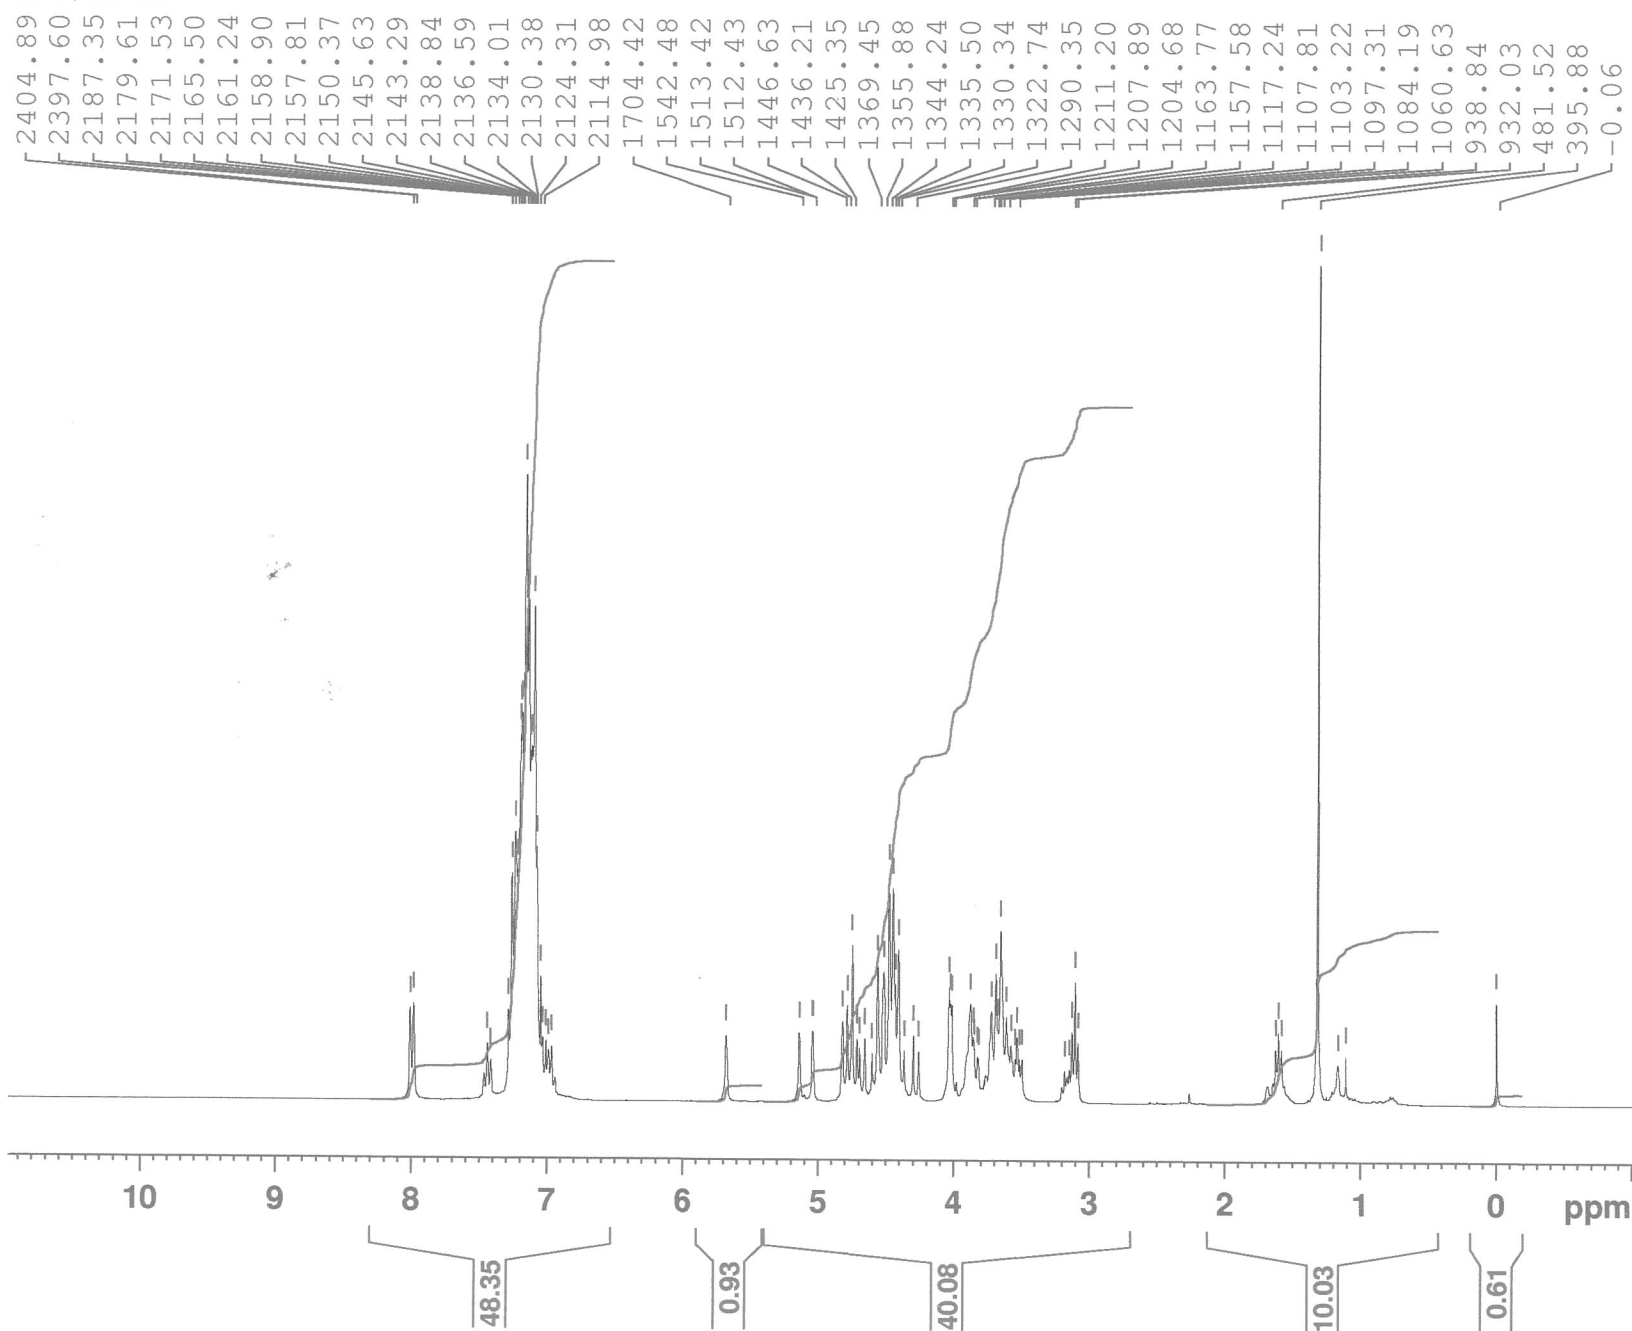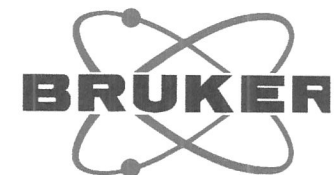

Current Data Parameters  
 NAME Dec02-2011-JMM  
 EXPNO 20  
 PROCNO 1

F2 - Acquisition Parameters  
 Date\_ 20111202  
 Time 9.45  
 INSTRUM spect  
 PROBHD 5 mm PABBO BB-  
 PULPROG zg30  
 TD 43268  
 SOLVENT CDCl3  
 NS 32  
 DS 2  
 SWH 6009.615 Hz  
 FIDRES 0.138893 Hz  
 AQ 3.5999477 sec  
 RG 20.2  
 DW 83.200 use  
 DE 6.50 use  
 TE 294.5 K  
 D1 1.0000000 sec  
 TD0 1

===== CHANNEL f1 =====  
 NUC1 1H  
 P1 13.60 use  
 PLW1 7.0000000 W  
 SFO1 300.1815009 MHz

F2 - Processing parameters  
 SI 65536  
 SF 300.1800741 MHz  
 WDW EM  
 SSB 0  
 LB 0.30 Hz  
 GB 0  
 PC 1.00

22

MP1/111A

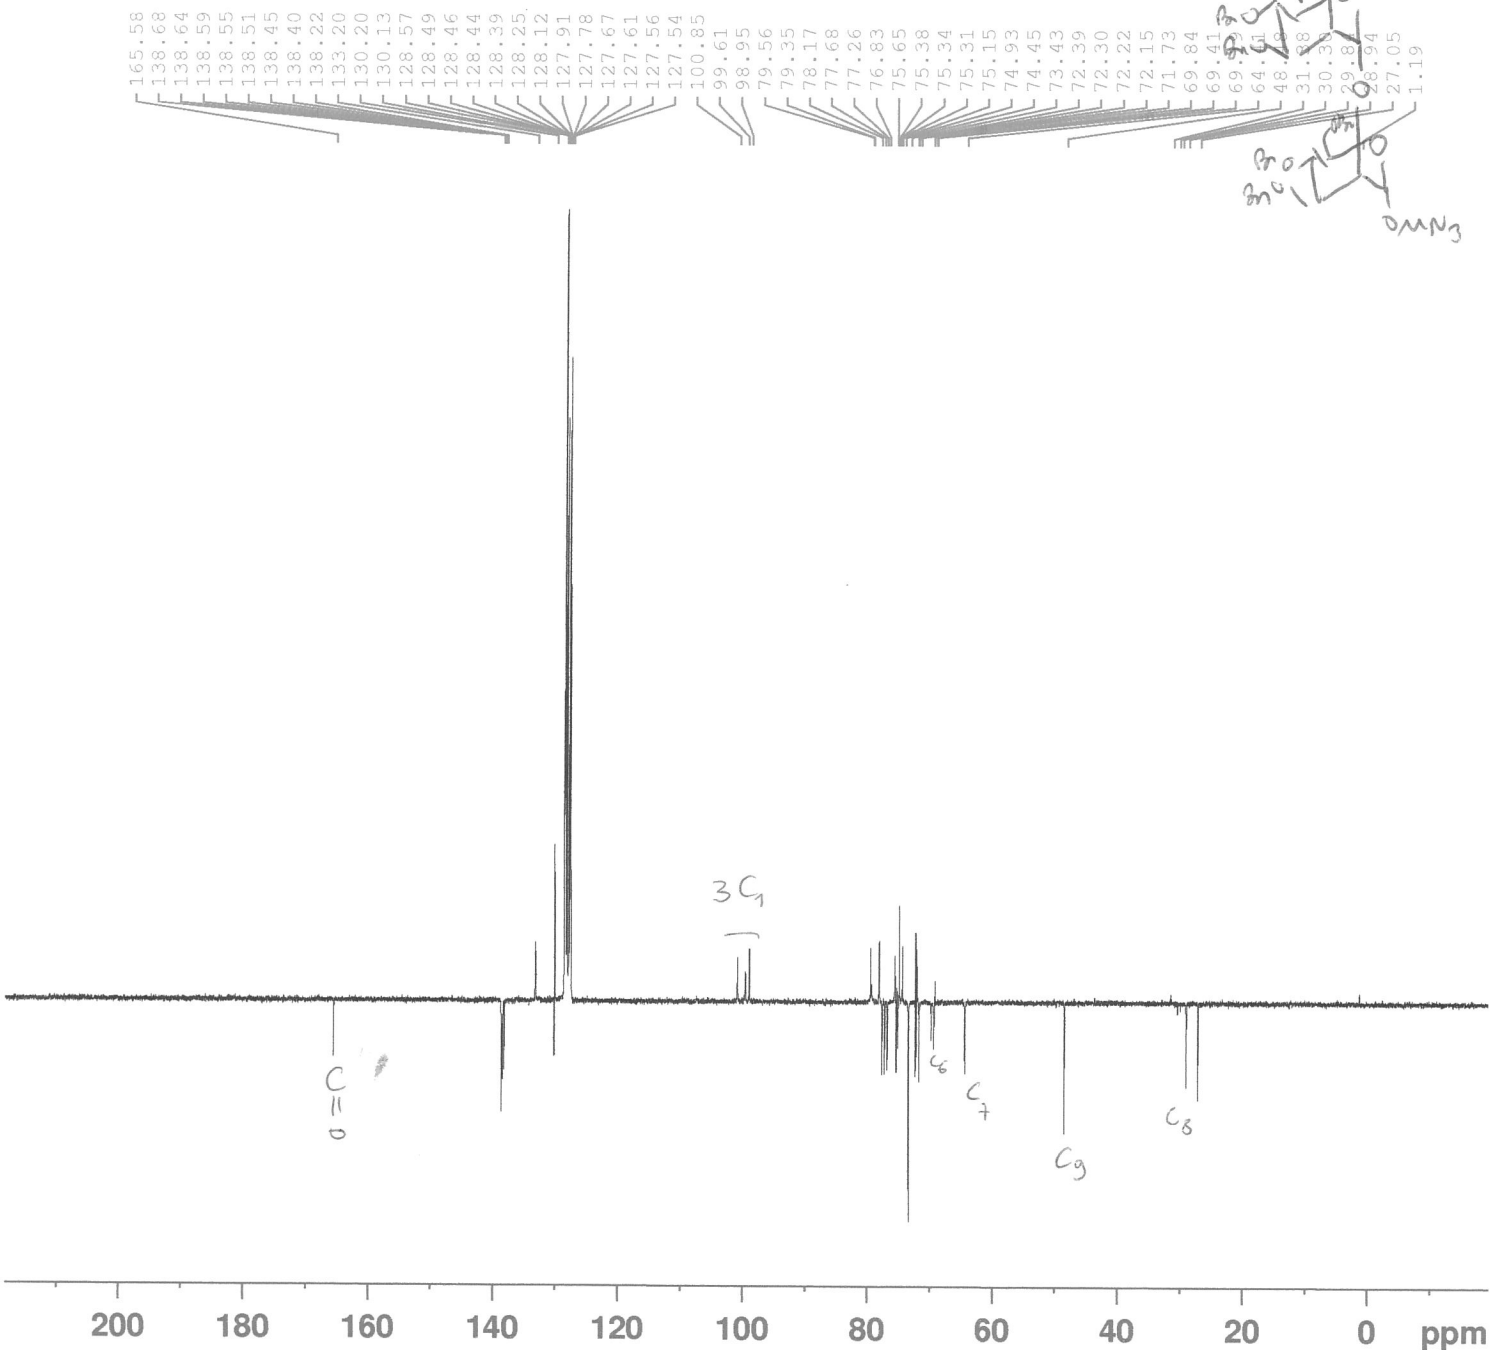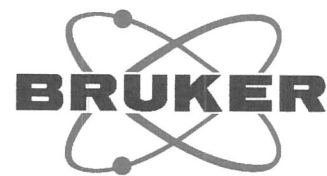

Current Data Parameters  
 NAME Dec02-2011-JMM  
 EXPNO 21  
 PROCNO 1

F2 - Acquisition Parameters  
 Date\_ 20111202  
 Time 10.03  
 INSTRUM spect  
 PROBHD 5 mm PABBO BB-  
 PULPROG jmod  
 TD 65536  
 SOLVENT CDCl3  
 NS 256  
 DS 4  
 SWH 18028.846 Hz  
 FIDRES 0.275098 Hz  
 AQ 1.8175818 sec  
 RG 2050  
 DW 27.733 usec  
 DE 6.50 usec  
 TE 295.0 K  
 CNST2 145.0000000  
 CNST11 1.0000000  
 D1 2.0000000 sec  
 D20 0.00689655 sec  
 TD0 1

===== CHANNEL f1 =====  
 NUC1 13C  
 P1 9.00 usec  
 P2 18.00 usec  
 PLW1 38.0000000 W  
 SFO1 75.4878691 MHz

===== CHANNEL f2 =====  
 CPDPRG2 waltz16  
 NUC2 1H  
 PCPD2 100.00 usec  
 PLW2 7.0000000 W  
 PLW12 0.1396400 W  
 SFO2 300.1812007 MHz

F2 - Processing parameters  
 SI 32768  
 SF 75.4803210 MHz  
 WDW EM  
 SSB 0  
 LB 1.00 Hz  
 GB 0  
 PC 1.40



MP1/161

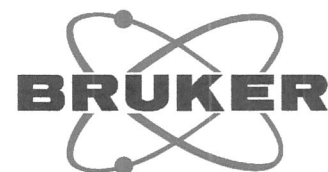

Current Data Parameters  
NAME Mar13-2012-JMM  
EXPNO 40  
PROCNO 1

F2 - Acquisition Parameters  
Date\_ 20120313  
Time 11.58  
INSTRUM spect  
PROBHD 5 mm PABBO BB-  
PULPROG zg30  
TD 43268  
SOLVENT CDCl3  
NS 32  
DS 2  
SWH 6009.615 Hz  
FIDRES 0.138893 Hz  
AQ 3.5999477 sec  
RG 14.2  
DW 83.200 usec  
DE 6.50 usec  
TE 294.7 K  
D1 1.00000000 sec  
TD0 1

===== CHANNEL f1 =====  
NUC1 1H  
P1 13.60 usec  
PLW1 7.00000000 W  
SFO1 300.1815009 MHz

F2 - Processing parameters  
SI 65536  
SF 300.1800000 MHz  
WDW EM  
SSB 0  
LB 0.30 Hz  
GB 0  
PC 1.00

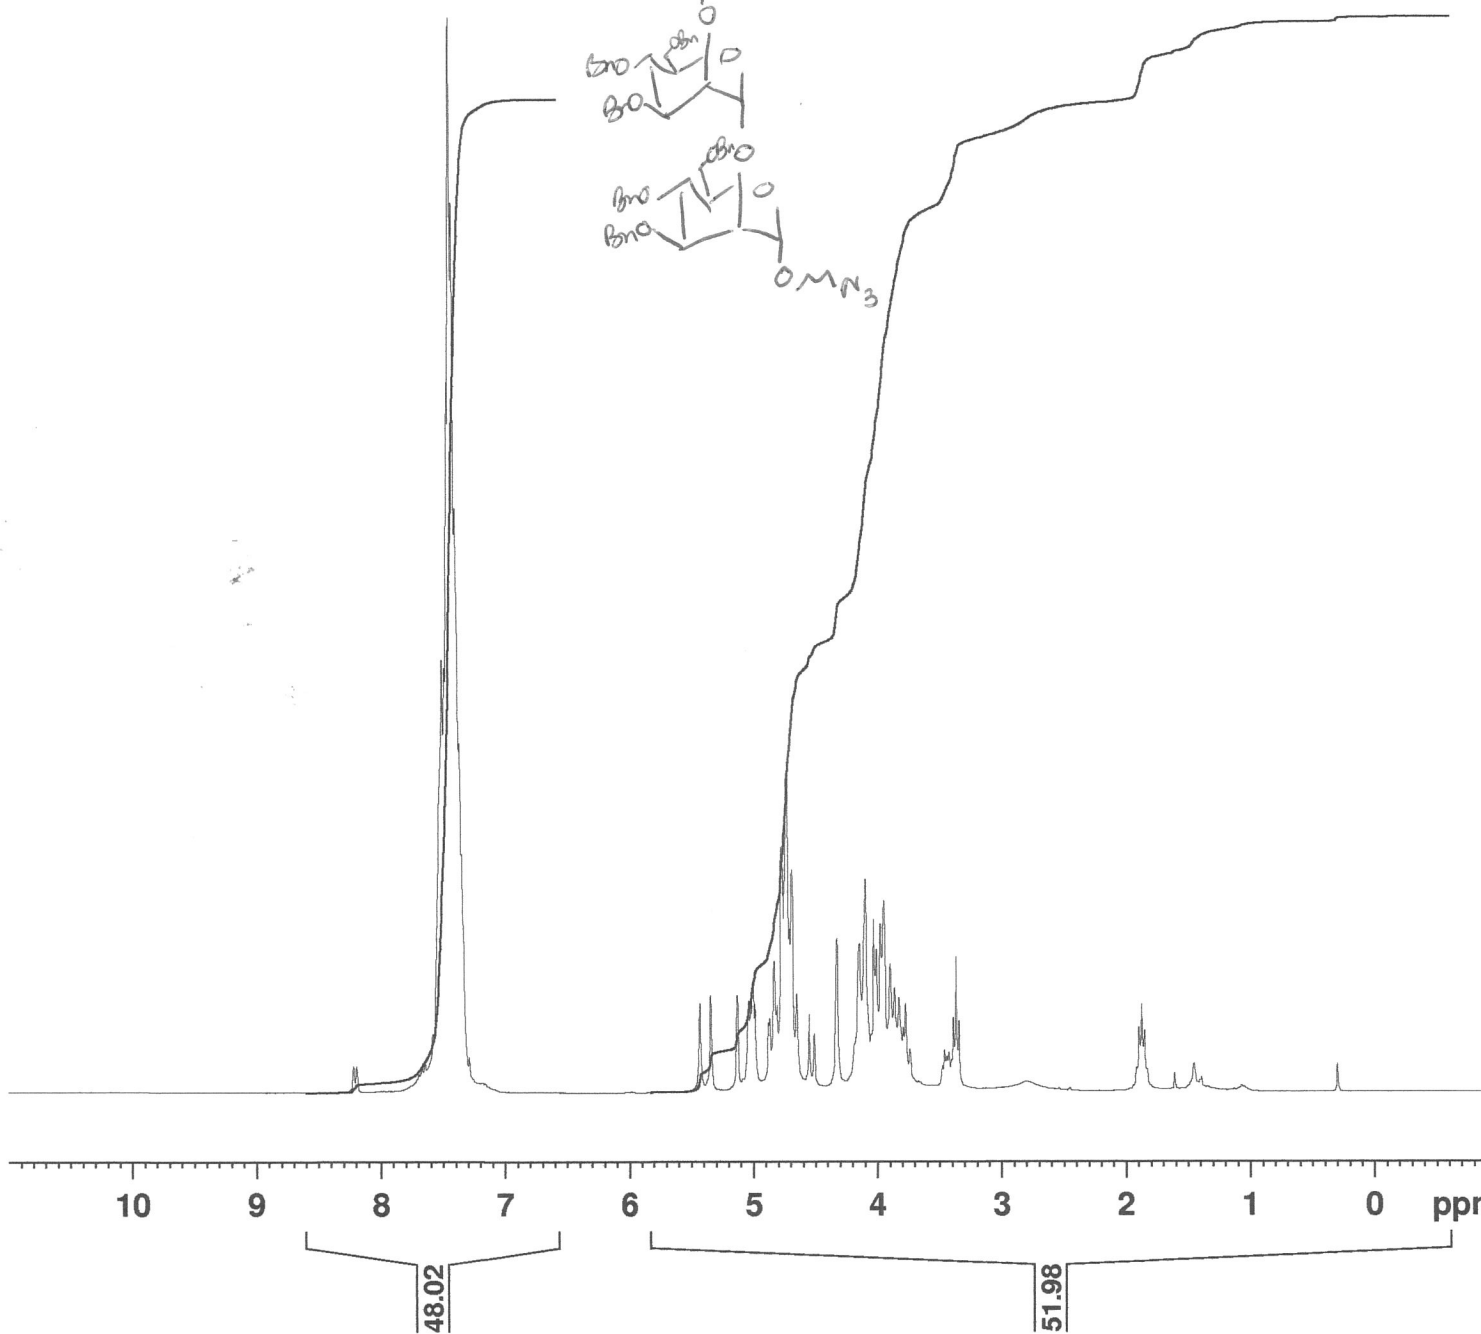

23

MP1/161

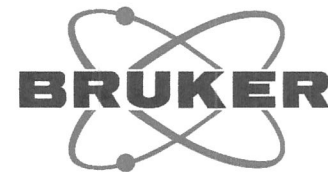

Current Data Parameters  
NAME Mar13-2012-JMM  
EXPNO 41  
PROCNO 1

F2 - Acquisition Parameters  
Date\_ 20120313  
Time 12.16  
INSTRUM spect  
PROBHD 5 mm PABBO BB-  
PULPROG jmod  
TD 65536  
SOLVENT CDCl3  
NS 256  
DS 4  
SWH 18028.846 Hz  
FIDRES 0.275098 Hz  
AQ 1.8175818 sec  
RG 2050  
DW 27.733 usec  
DE 6.50 usec  
TE 295.2 K  
CNST2 145.0000000  
CNST11 1.0000000  
D1 2.00000000 sec  
D20 0.00689655 sec  
TD0 1

===== CHANNEL f1 =====  
NUC1 13C  
P1 9.00 usec  
P2 18.00 usec  
PLW1 38.00000000 W  
SFO1 75.4878691 MHz

===== CHANNEL f2 =====  
CPDPRG2 waltz16  
NUC2 1H  
PCPD2 100.00 usec  
PLW2 7.00000000 W  
PLW12 0.13964000 W  
SFO2 300.1812007 MHz

F2 - Processing parameters  
SI 32768  
SF 75.4803210 MHz  
WDW EM  
SSB 0  
LB 1.00 Hz  
GB 0  
PC 1.40

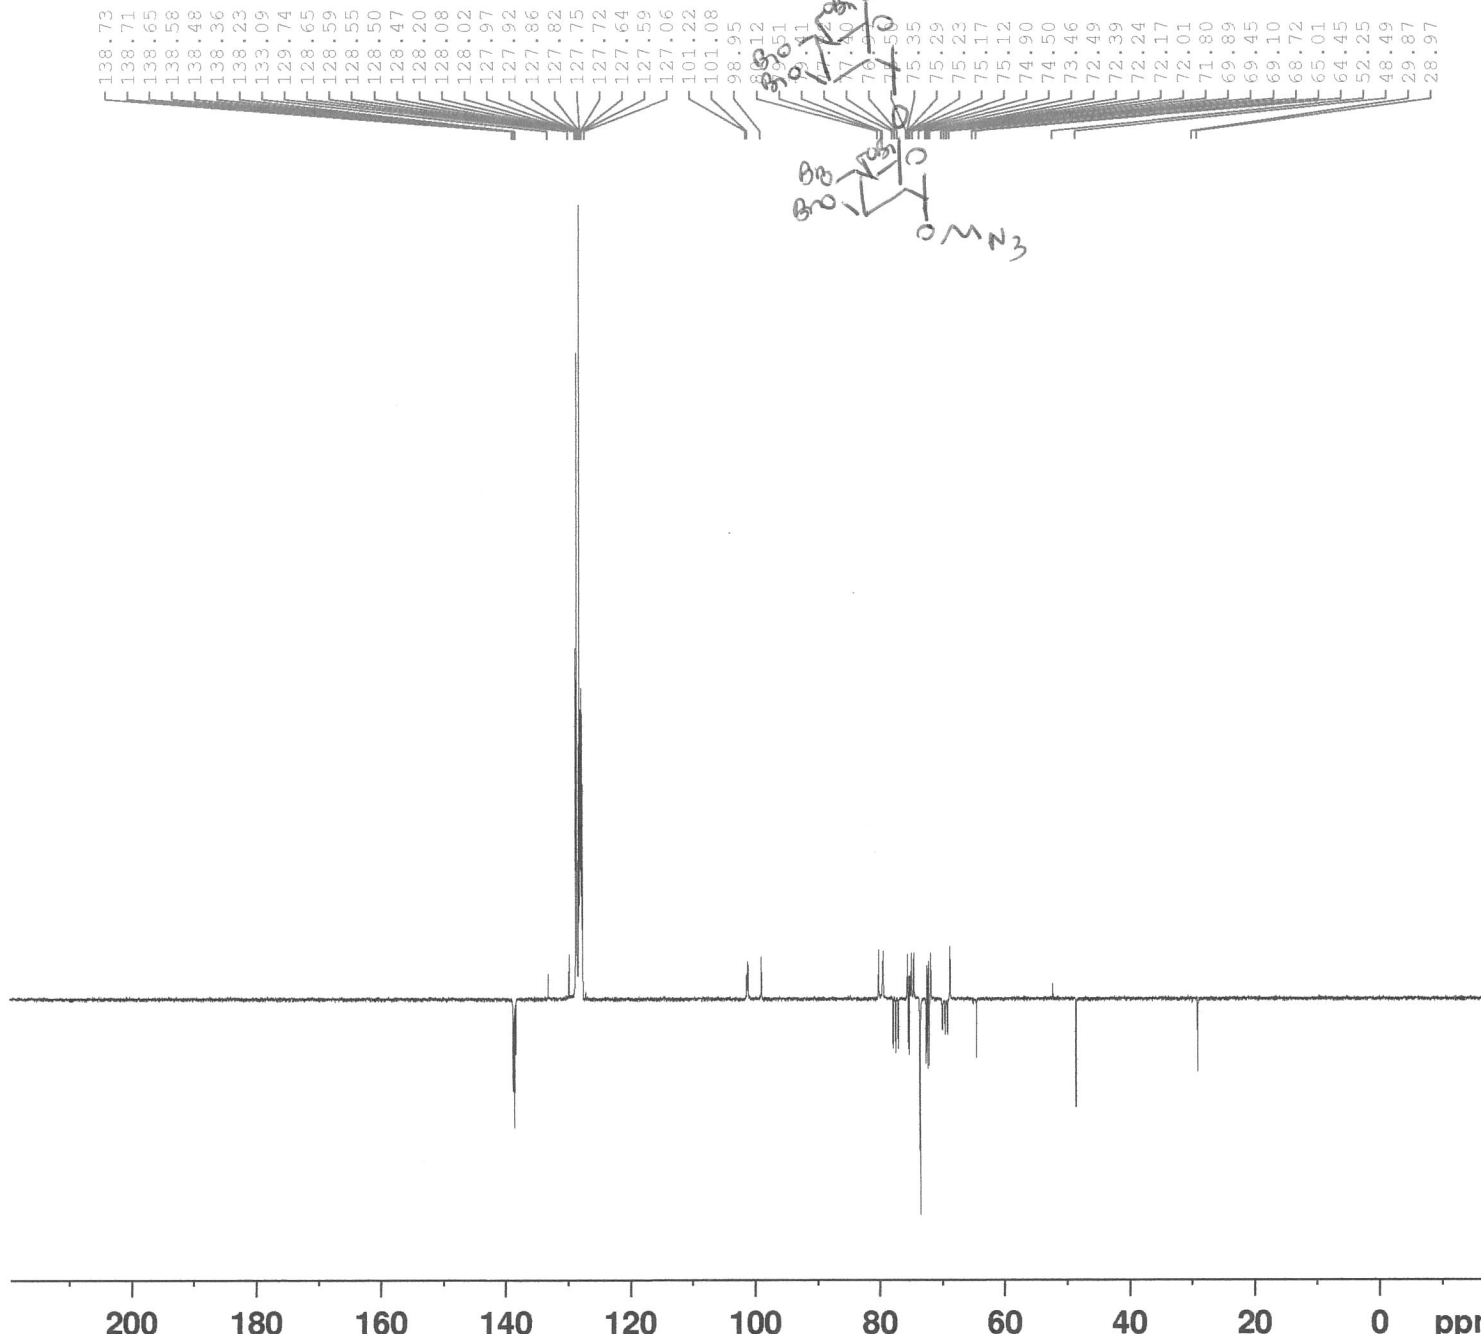

MP1/114

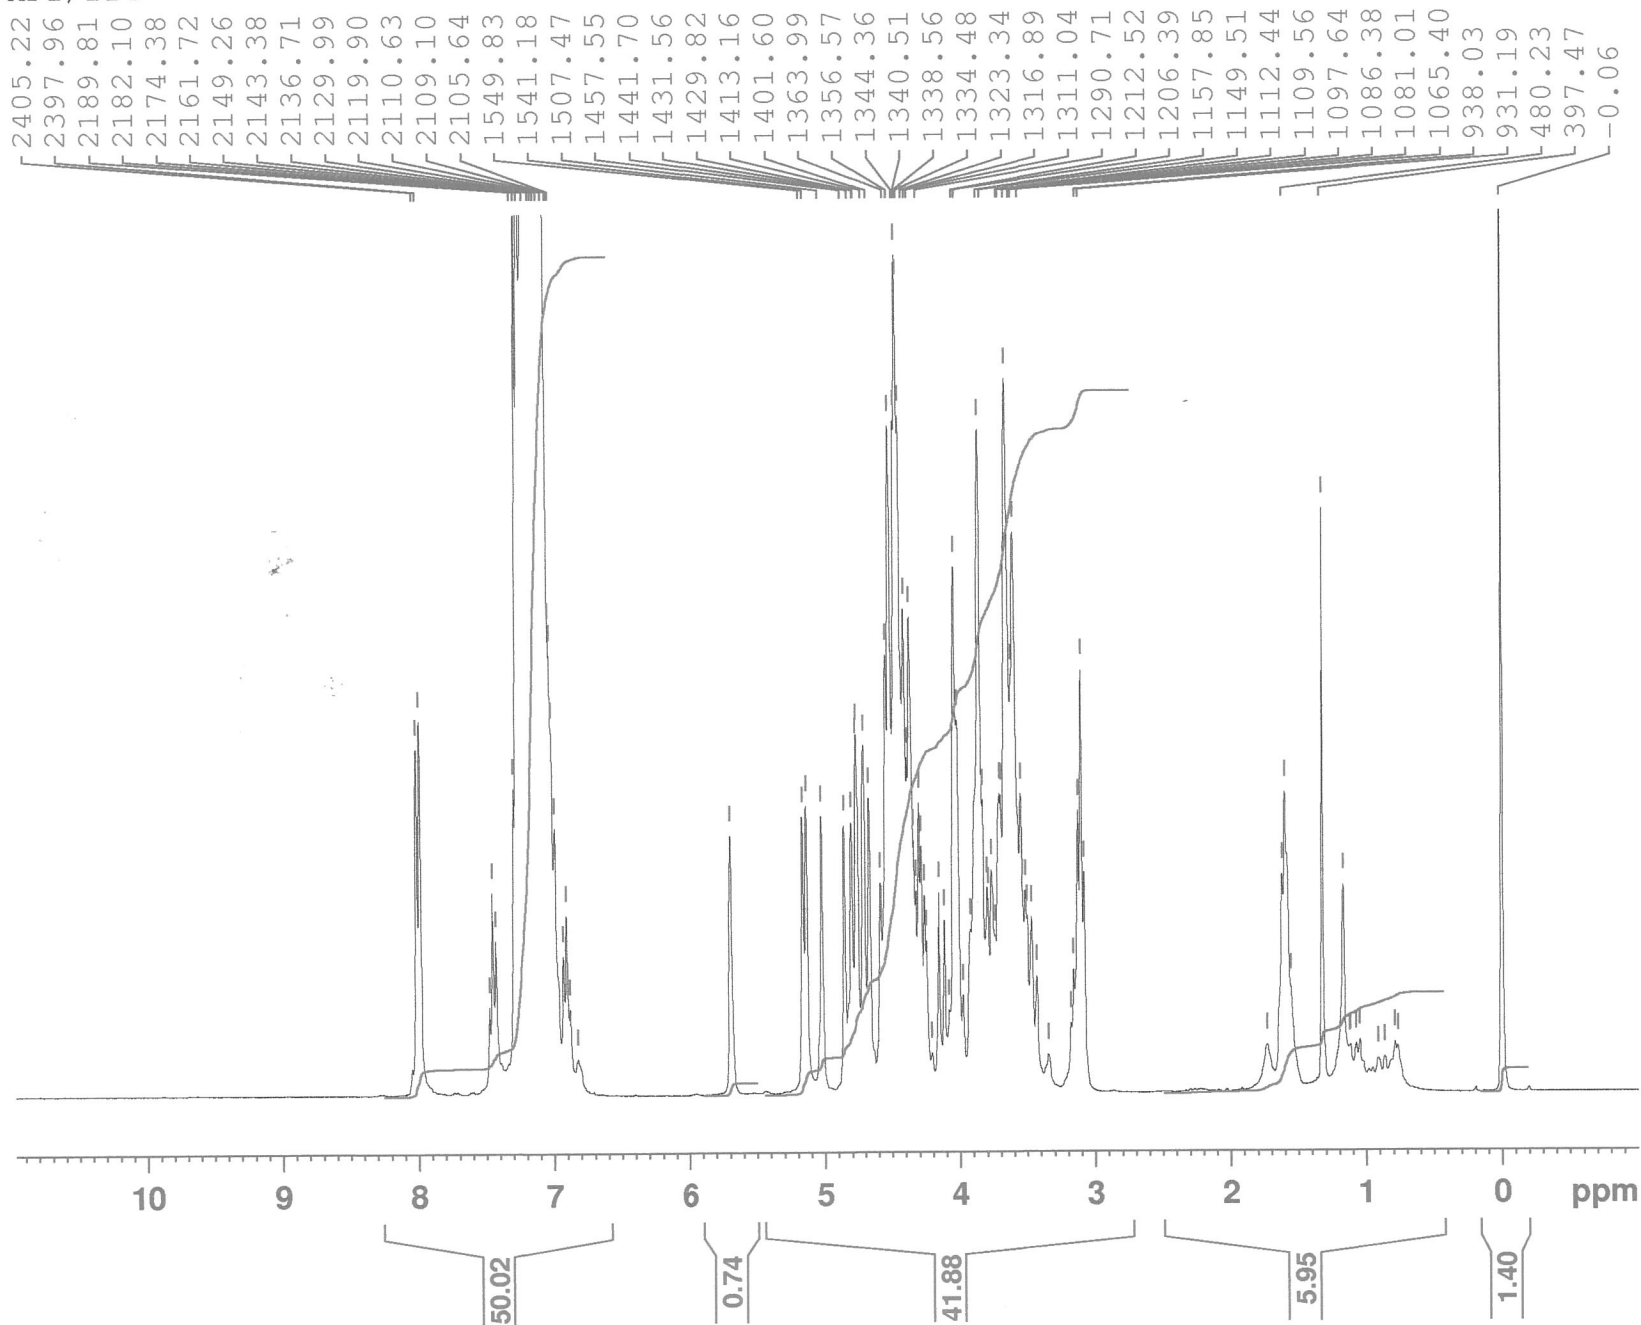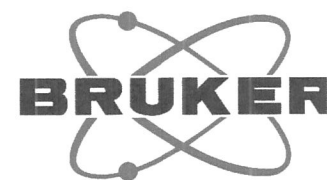

Current Data Parameters  
NAME Dec08-2011-JMM  
EXPNO 30  
PROCNO 1

F2 - Acquisition Parameters  
Date\_ 20111208  
Time 10.21  
INSTRUM spect  
PROBHD 5 mm PABBO BB-  
PULPROG zg30  
TD 43268  
SOLVENT CDCl3  
NS 32  
DS 2  
SWH 6009.615 Hz  
FIDRES 0.138893 Hz  
AQ 3.5999477 sec  
RG 32  
DW 83.200 use  
DE 6.50 use  
TE 294.1 K  
D1 1.0000000 sec  
TD0 1

==== CHANNEL f1 =====  
NUC1 1H  
P1 13.60 use  
PLW1 7.0000000 W  
SFO1 300.1815009 MHz

F2 - Processing parameters  
SI 65536  
SF 300.1800693 MHz  
WDW EM  
SSB 0  
LB 0.30 Hz  
GB 0  
PC 1.00

24  
MP1/114

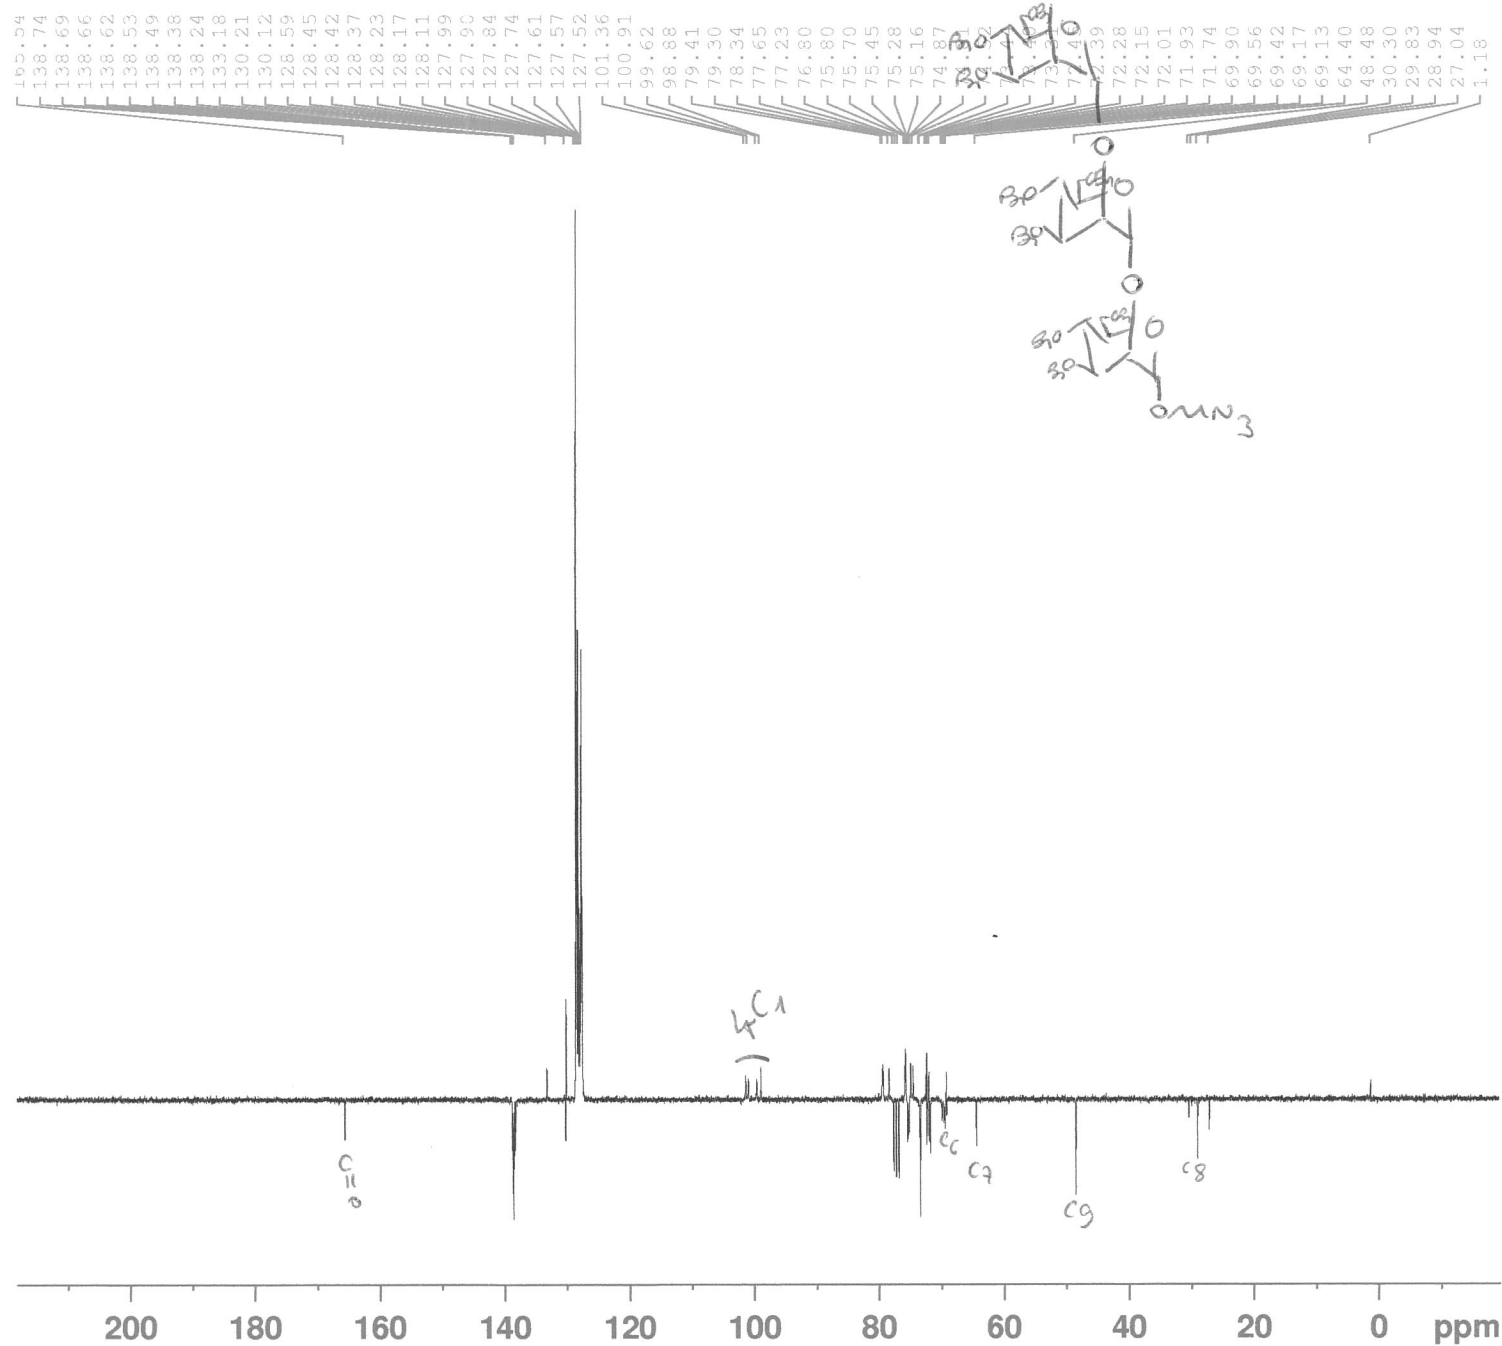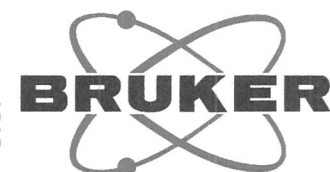

Current Data Parameters  
NAME Dec07-2011-JMM  
EXPNO 171  
PROCNO 1

F2 - Acquisition Parameters  
Date\_ 20111207  
Time 18.49  
INSTRUM spect  
PROBHD 5 mm PABBO BB-  
PULPROG jmod  
TD 65536  
SOLVENT CDCl3  
NS 256  
DS 4  
SWH 18028.846 Hz  
FIDRES 0.275098 Hz  
AQ 1.8175818 sec  
RG 2050  
DW 27.733 usec  
DE 6.50 usec  
TE 295.0 K  
CNST2 145.000000  
CNST11 1.000000  
D1 2.0000000 sec  
D20 0.00689655 sec  
TD0 1

==== CHANNEL f1 =====  
NUC1 13C  
P1 9.00 usec  
P2 18.00 usec  
PLW1 38.0000000 W  
SFO1 75.4878691 MHz

==== CHANNEL f2 =====  
CPDPRG2 waltz16  
NUC2 1H  
PCPD2 100.00 usec  
PLW2 7.0000000 W  
PLW12 0.13964000 W  
SFO2 300.1812007 MHz

F2 - Processing parameters  
SI 32768  
SF 75.4803210 MHz  
WDW EM  
SSB 0  
LB 1.00 Hz  
GB 0  
PC 1.40



MP2/24

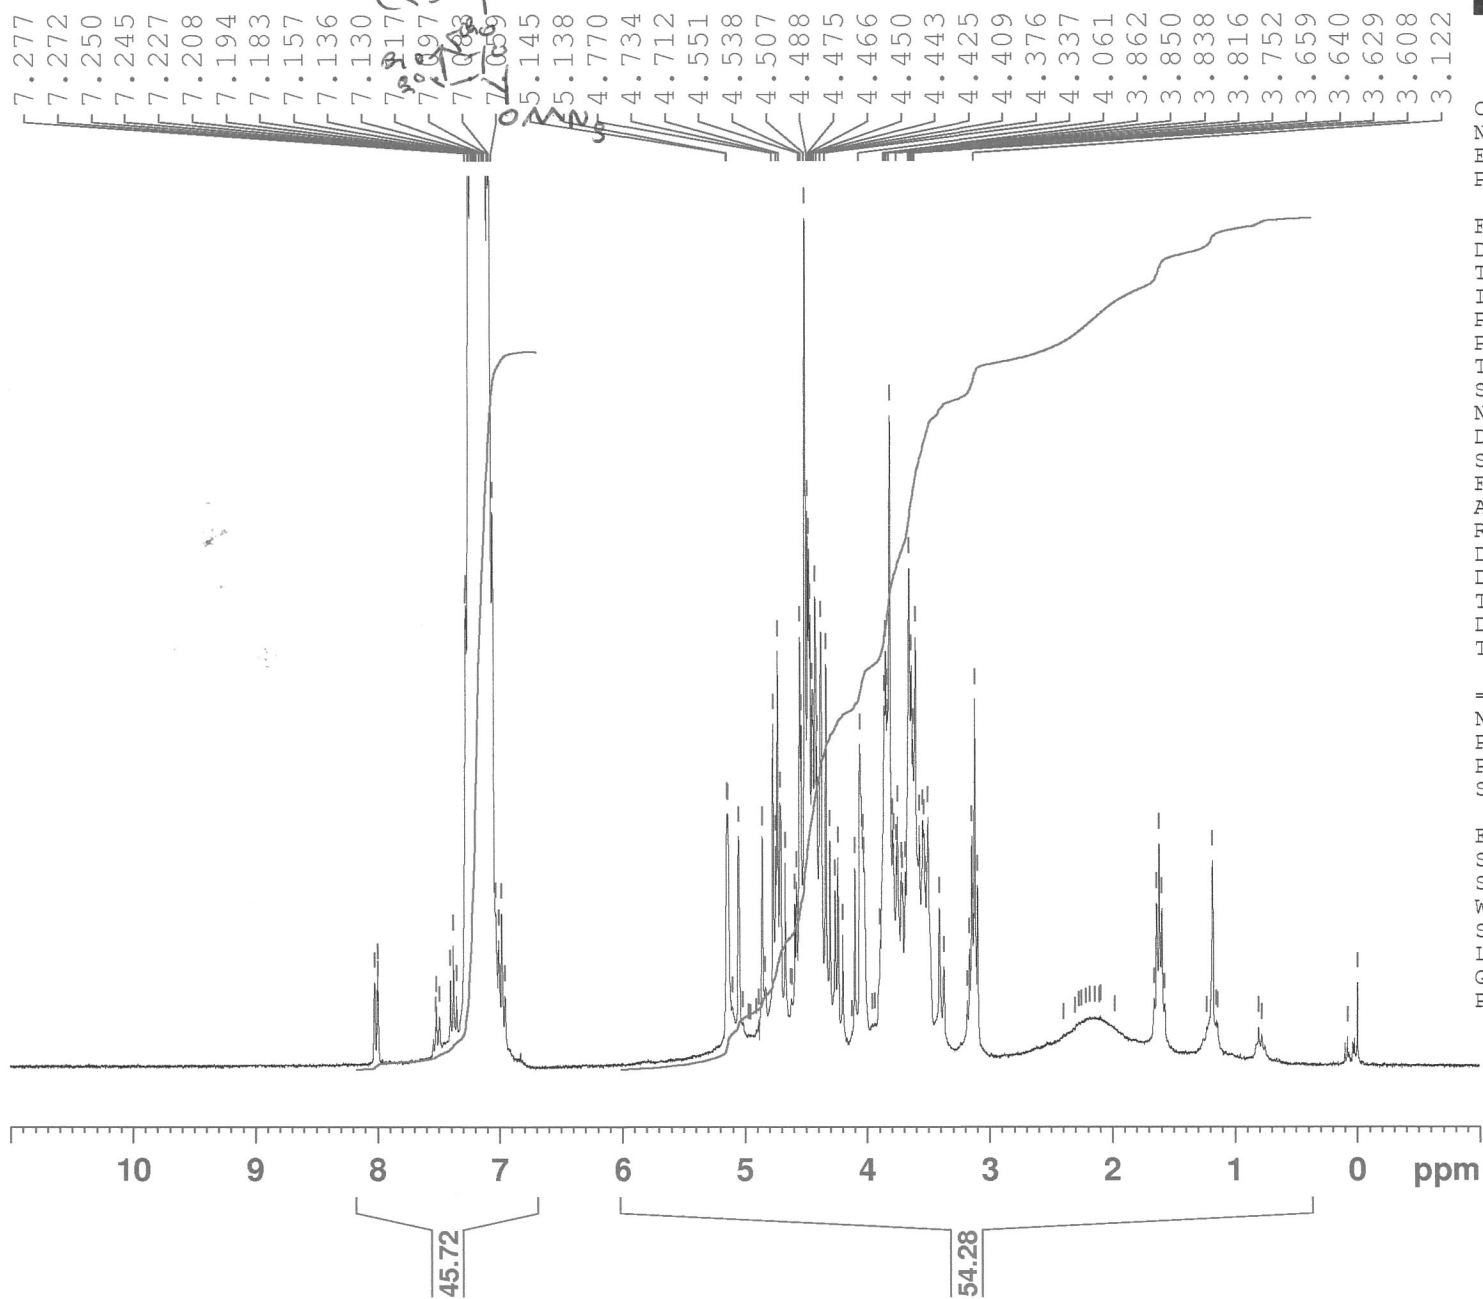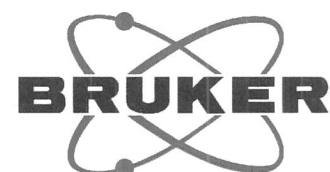

Current Data Parameters  
 NAME Jun20-2012-JMM  
 EXPNO 60  
 PROCNO 1

F2 - Acquisition Parameters  
 Date\_ 20120620  
 Time 10.21  
 INSTRUM spect  
 PROBHD 5 mm PABBO BB-  
 PULPROG zg30  
 TD 43268  
 SOLVENT CDCl3  
 NS 32  
 DS 2  
 SWH 6009.615 Hz  
 FIDRES 0.138893 Hz  
 AQ 3.5999477 sec  
 RG 161  
 DW 83.200 usec  
 DE 6.50 usec  
 TE 295.5 K  
 D1 1.00000000 sec  
 TD0 1

===== CHANNEL f1 =====  
 NUC1 1H  
 P1 13.60 usec  
 PLW1 7.00000000 W  
 SFO1 300.1815009 MHz

F2 - Processing parameters  
 SI 65536  
 SF 300.1800336 MHz  
 WDW EM  
 SSB 0  
 LB 0.30 Hz  
 GB 0  
 PC 1.00

27

MP1/192

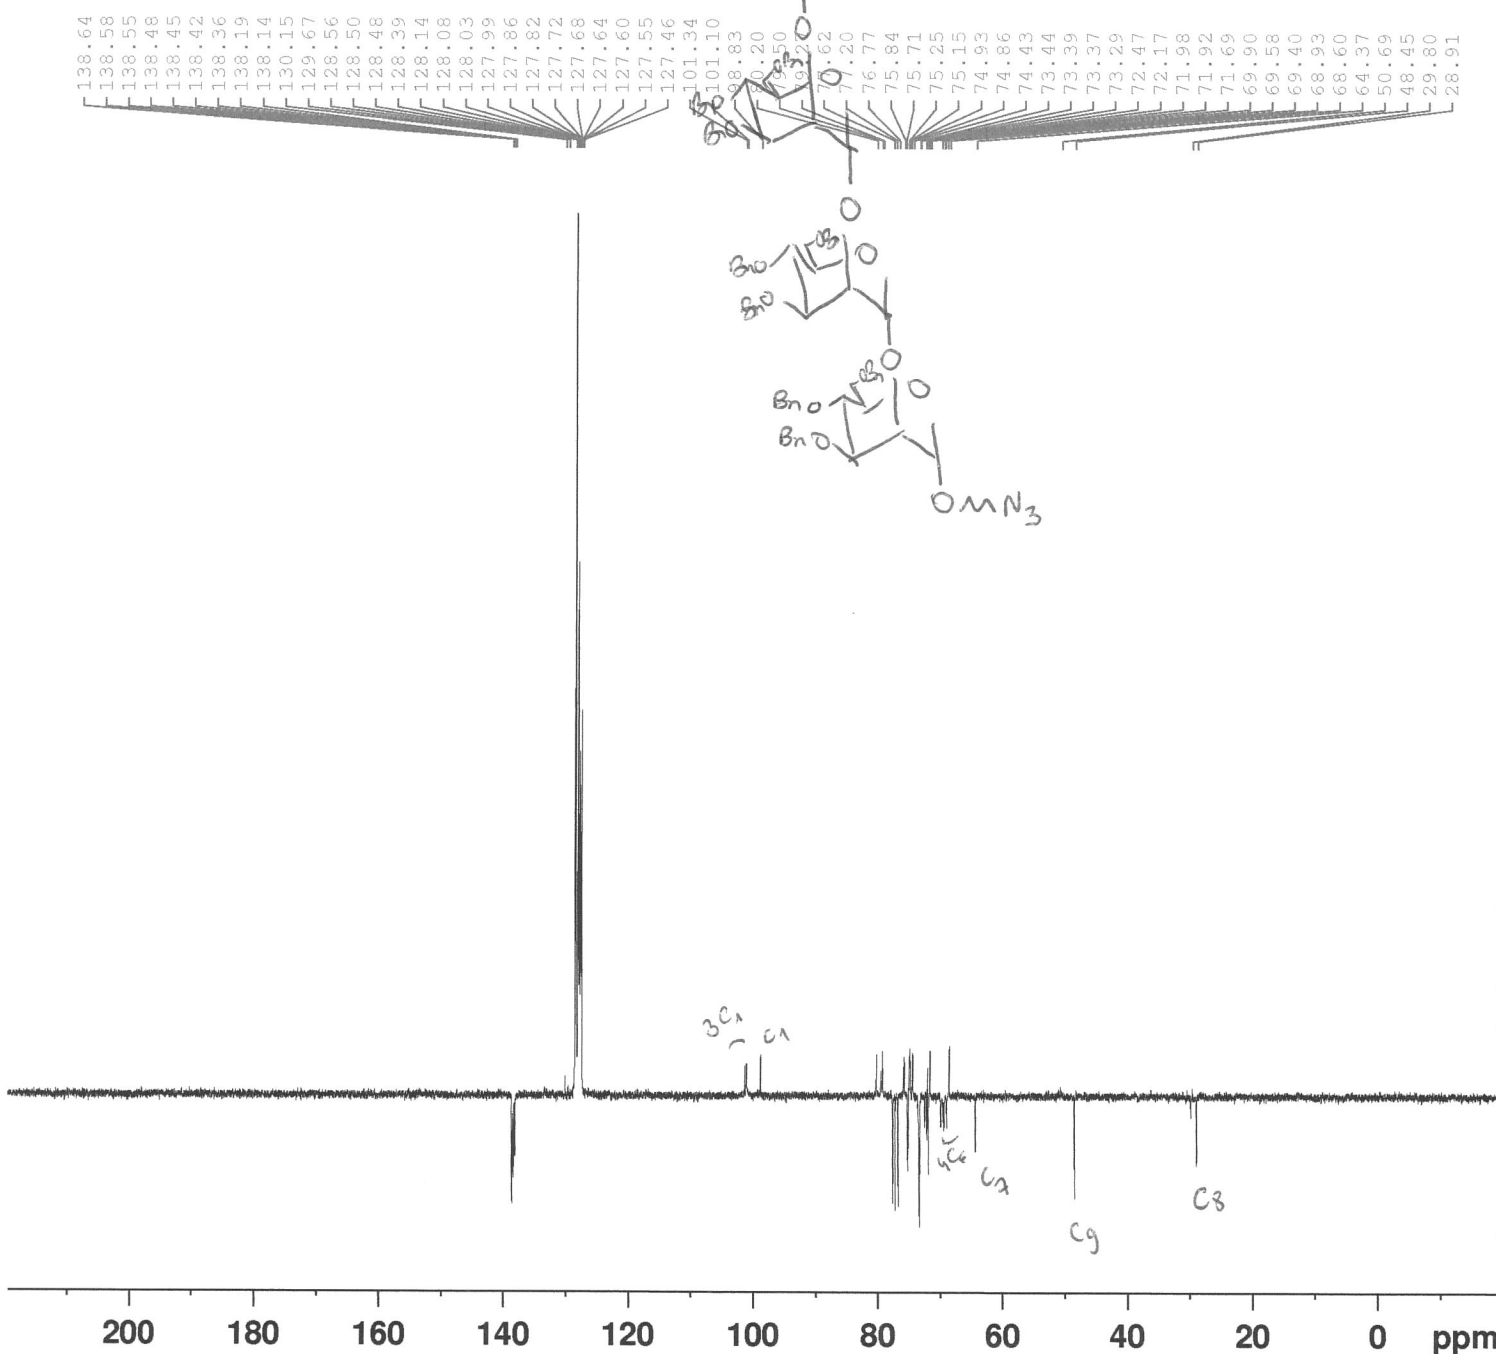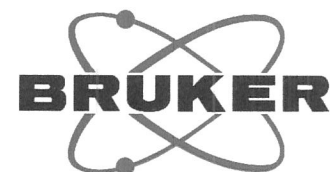

Current Data Parameters  
 NAME May16-2012-JMM  
 EXPNO 51  
 PROCNO 1

F2 - Acquisition Parameters  
 Date\_ 20120516  
 Time 12.18  
 INSTRUM spect  
 PROBHD 5 mm PABBO BB-  
 PULPROG jmod  
 TD 65536  
 SOLVENT CDCl3  
 NS 256  
 DS 4  
 SWH 18028.846 Hz  
 FIDRES 0.275098 Hz  
 AQ 1.8175818 sec  
 RG 2050  
 DW 27.733 usec  
 DE 6.50 usec  
 TE 295.8 K  
 CNST2 145.0000000  
 CNST11 1.0000000  
 D1 2.00000000 sec  
 D20 0.00689655 sec  
 TD0 1

===== CHANNEL f1 =====  
 NUC1 13C  
 P1 9.00 usec  
 P2 18.00 usec  
 PLW1 38.00000000 W  
 SFO1 75.4878691 MHz

===== CHANNEL f2 =====  
 CPDPRG2 waltz16  
 NUC2 1H  
 PCPD2 100.00 usec  
 PLW2 7.00000000 W  
 PLW12 0.13964000 W  
 SFO2 300.1812007 MHz

F2 - Processing parameters  
 SI 32768  
 SF 75.4803210 MHz  
 WDW EM  
 SSB 0  
 LB 1.00 Hz  
 GB 0  
 PC 1.40



(A)

MP2/71A

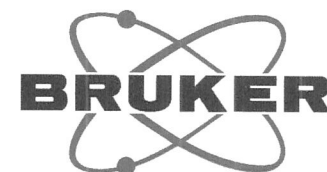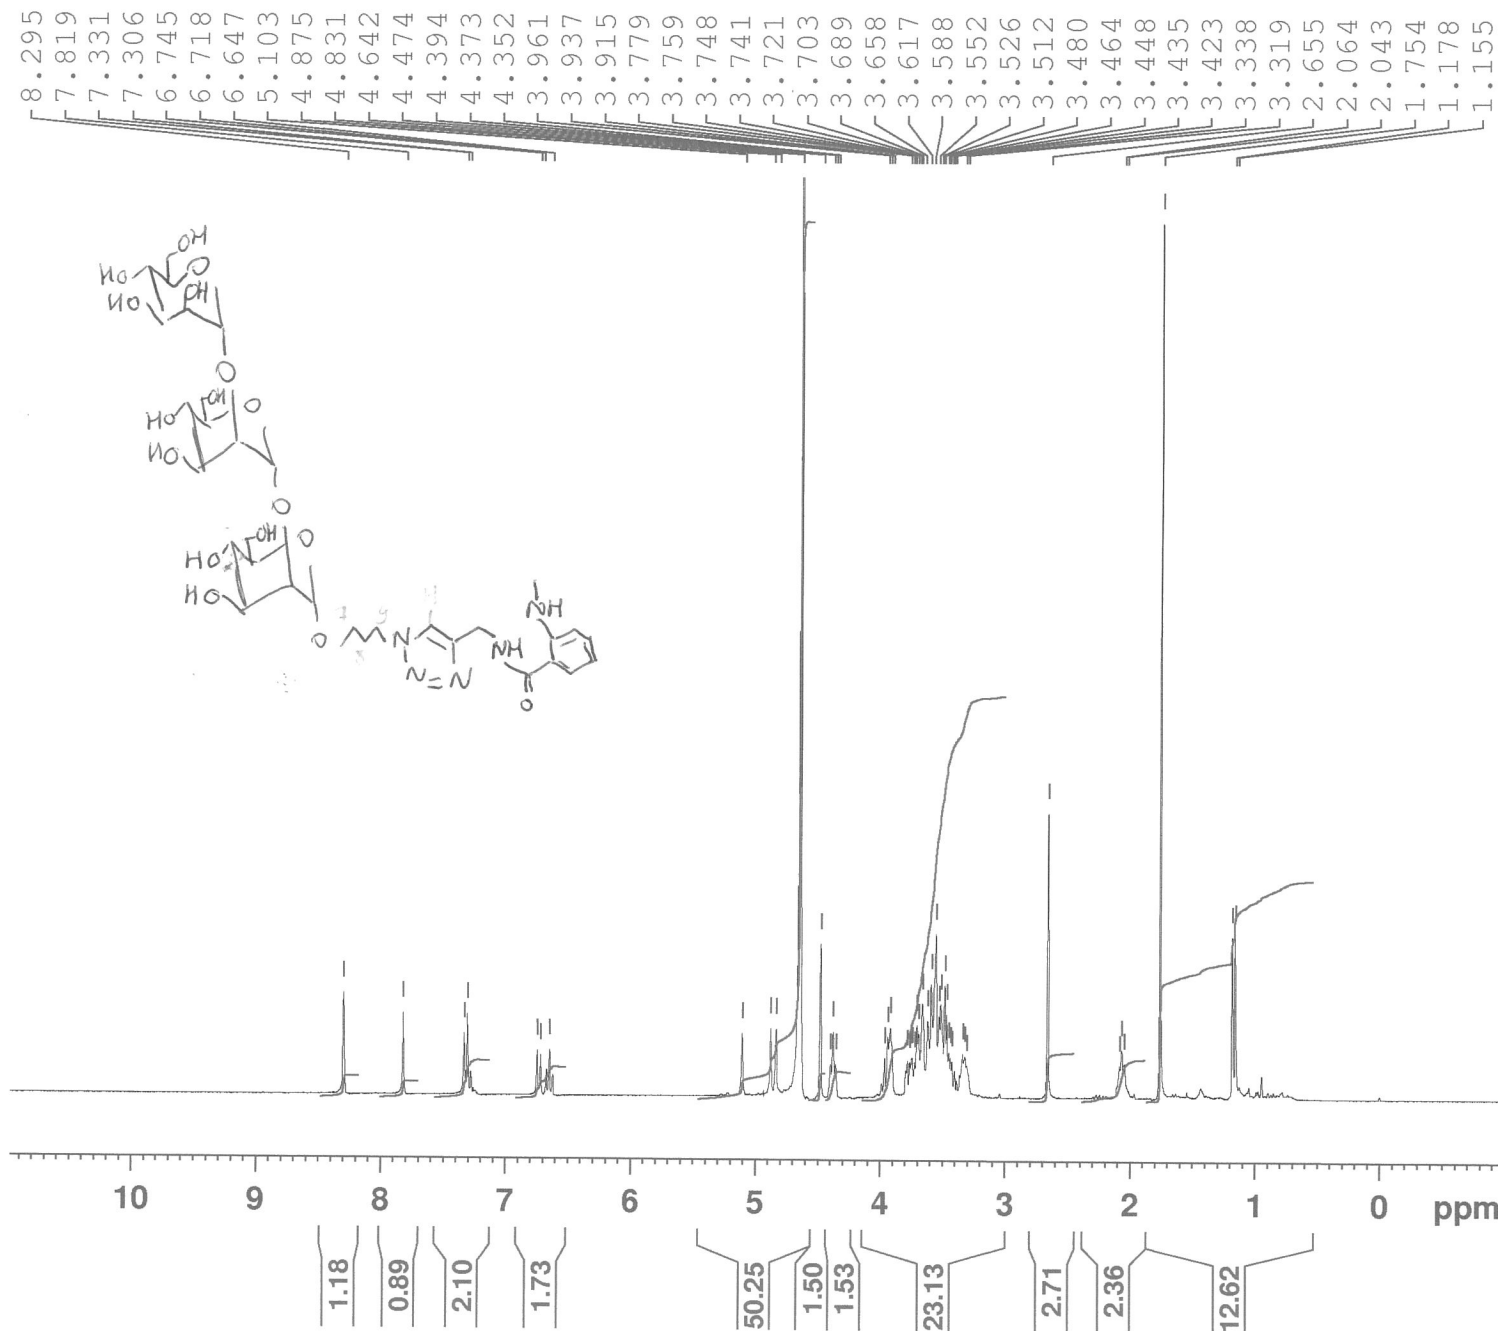

Current Data Parameters  
 NAME Oct26-2012-JMM  
 EXPNO 100  
 PROCNO 1

F2 - Acquisition Parameters  
 Date\_ 20121026  
 Time 18.00  
 INSTRUM spect  
 PROBHD 5 mm PABBO BB-  
 PULPROG zg30  
 TD 43268  
 SOLVENT D2O  
 NS 32  
 DS 2  
 SWH 6009.615 Hz  
 FIDRES 0.138893 Hz  
 AQ 3.5998976 sec  
 RG 256  
 DW 83.200 usec  
 DE 6.50 usec  
 TE 296.1 K  
 D1 1.00000000 sec  
 TDO 1

==== CHANNEL f1 =====  
 SFO1 300.1815009 MHz  
 NUC1 1H  
 P1 13.60 usec  
 PLW1 7.00000000 W

F2 - Processing parameters  
 SI 65536  
 SF 300.1800208 MHz  
 WDW EM  
 SSB 0  
 LB 0.30 Hz  
 GB 0  
 PC 1.00

Oct26-2012-JMM  
 MP2/71A

(A)

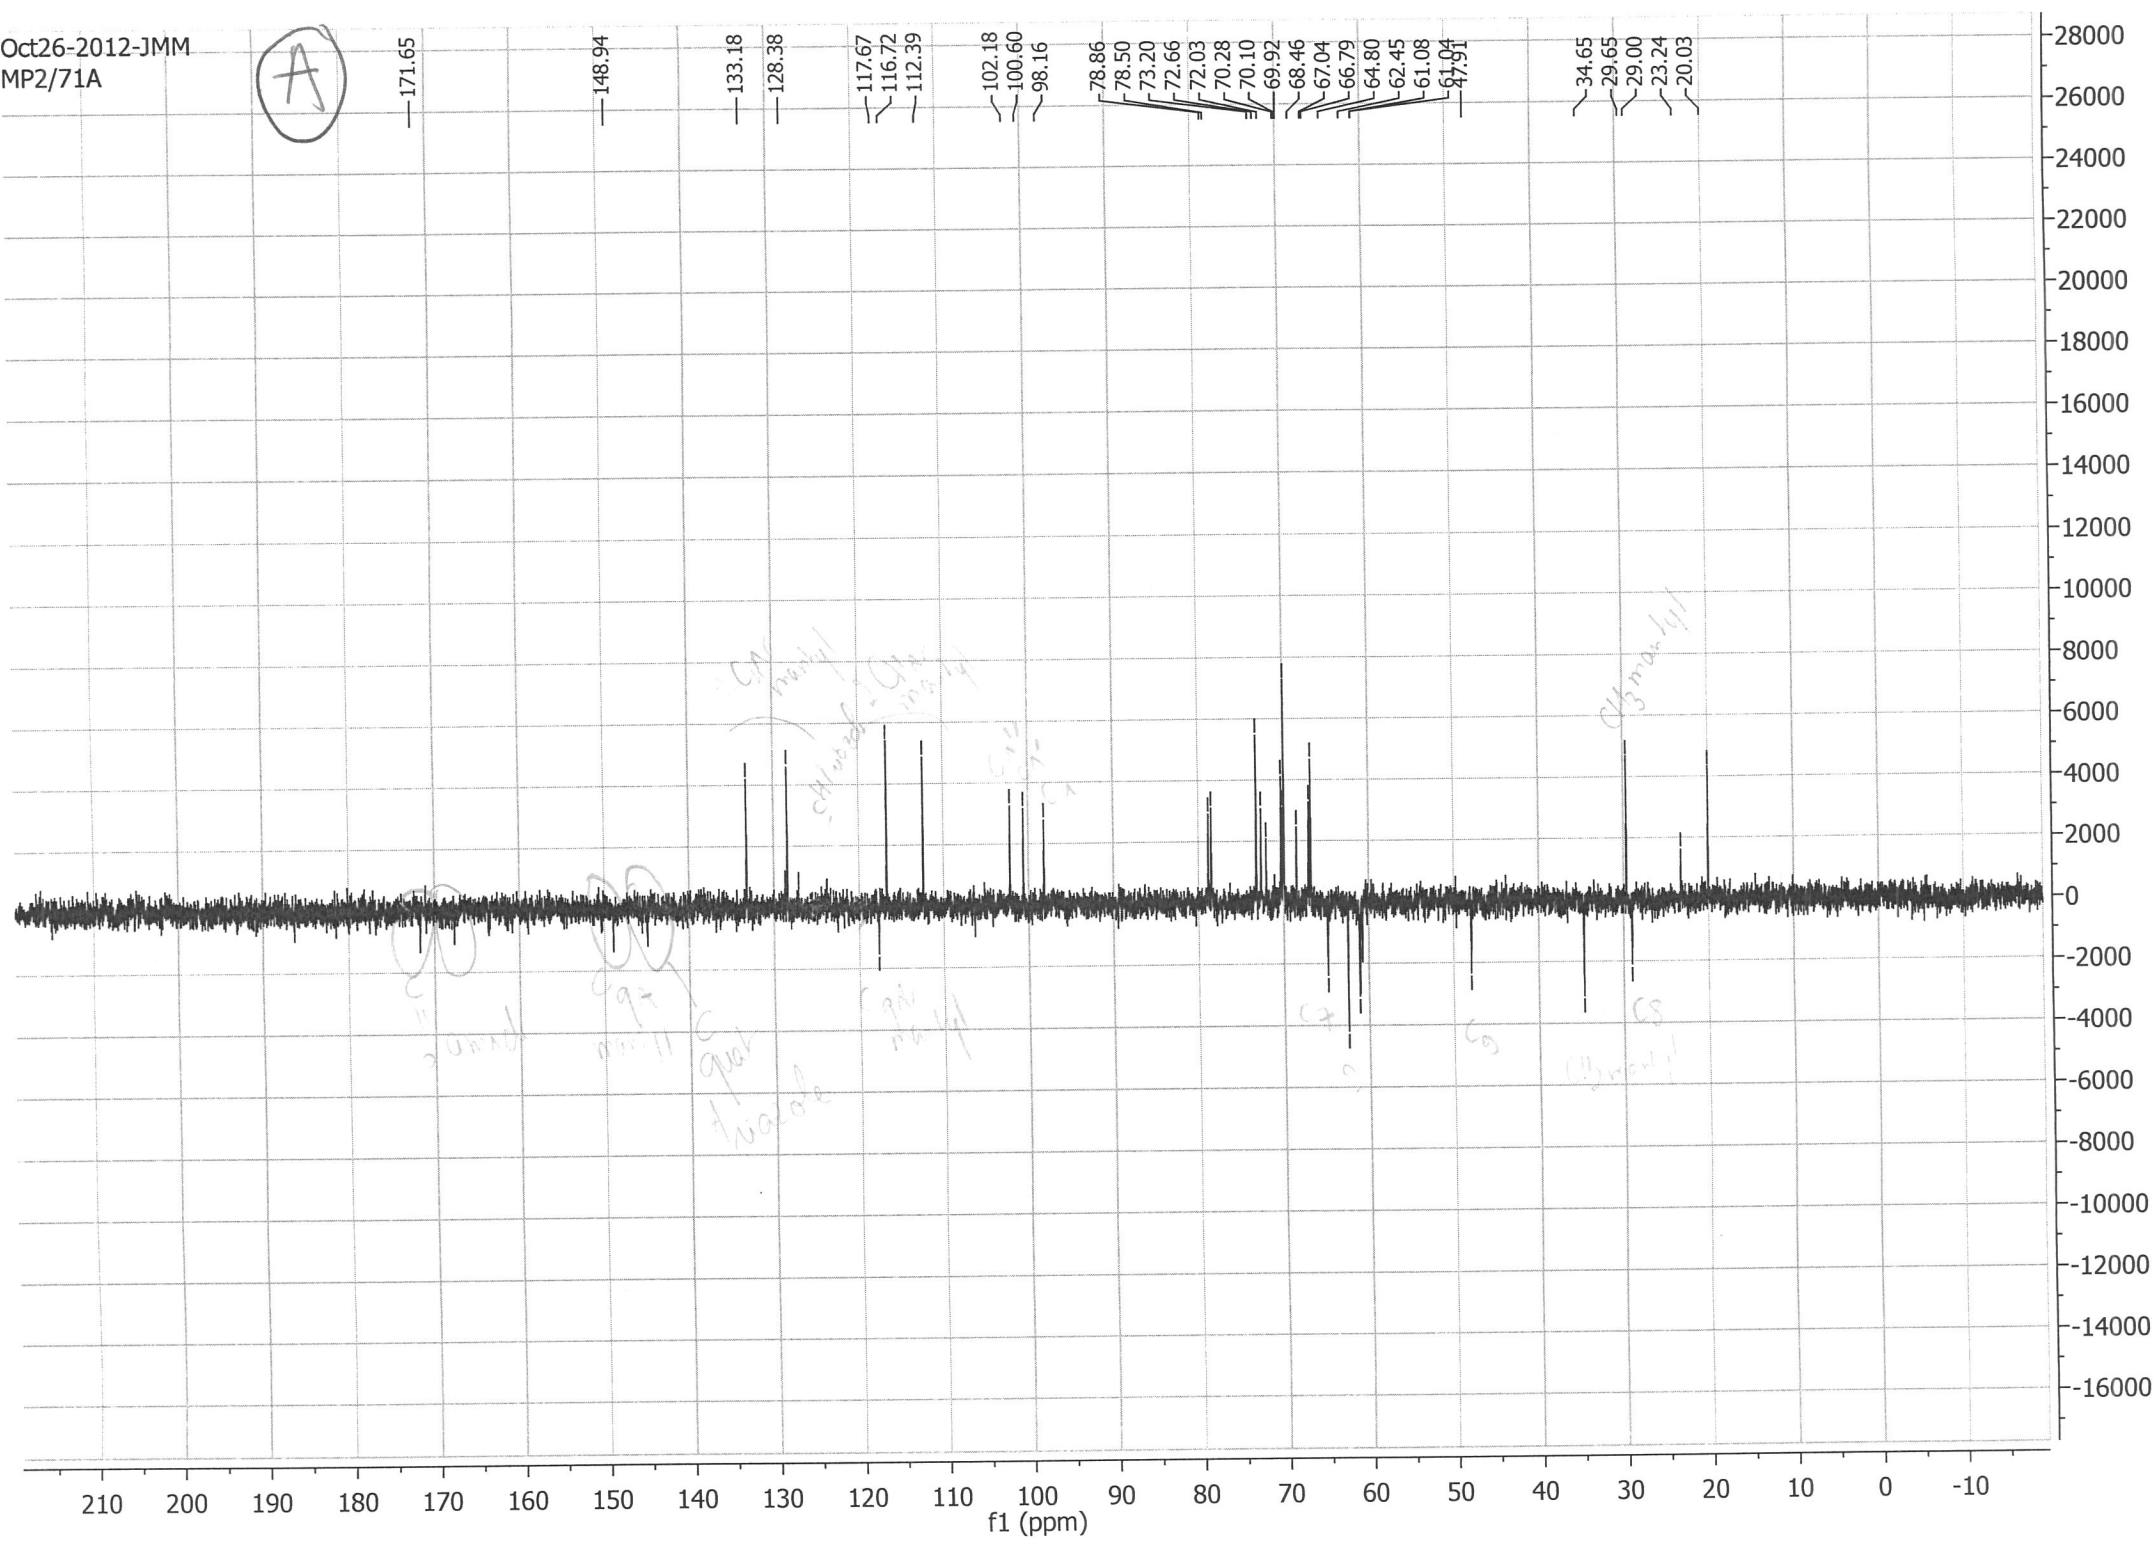

MP2/57A''

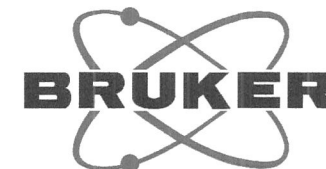

7.910  
7.657  
7.577  
7.548  
7.288  
5.187  
5.149  
4.930  
4.888  
4.781  
4.710  
4.581  
4.455  
4.433  
4.414  
4.414  
3.986  
3.957  
3.853  
3.842  
3.831  
3.822  
3.809  
3.791  
3.772  
3.751  
3.739  
3.717  
3.709  
3.664  
3.639  
3.604  
3.582  
3.560  
3.550  
3.527  
3.518  
3.495  
3.389  
3.369  
2.916  
2.139  
2.117  
2.099  
1.953

Current Data Parameters  
 NAME Nov23-2012-JMM  
 EXPNO 70  
 PROCNO 1

F2 - Acquisition Parameters  
 Date\_ 20121123  
 Time 16.29  
 INSTRUM spect  
 PROBHD 5 mm PABBO BB-  
 PULPROG zg30  
 TD 43268  
 SOLVENT D2O  
 NS 32  
 DS 2  
 SWH 6009.615 Hz  
 FIDRES 0.138893 Hz  
 AQ 3.5998976 sec  
 RG 362  
 DW 83.200 usec  
 DE 6.50 usec  
 TE 294.8 K  
 D1 1.00000000 sec  
 TDO 1

==== CHANNEL f1 =====  
 SFO1 300.1815009 MHz  
 NUC1 1H  
 P1 13.60 usec  
 PLW1 7.00000000 W

F2 - Processing parameters  
 SI 65536  
 SF 300.1800000 MHz  
 WDW EM  
 SSB 0  
 LB 0.30 Hz  
 GB 0  
 PC 1.00

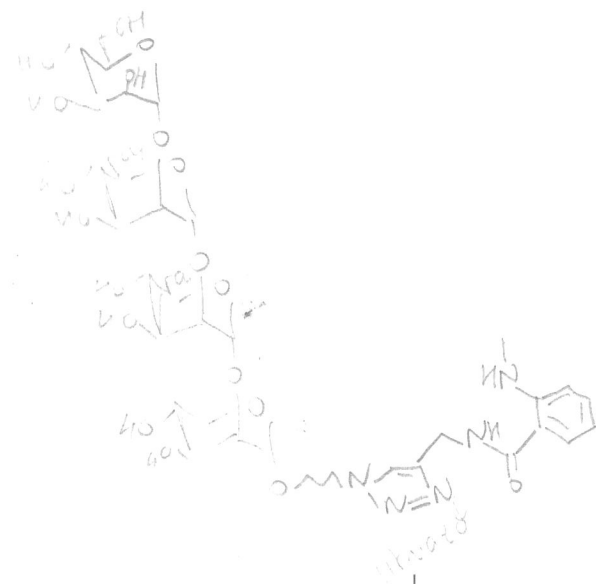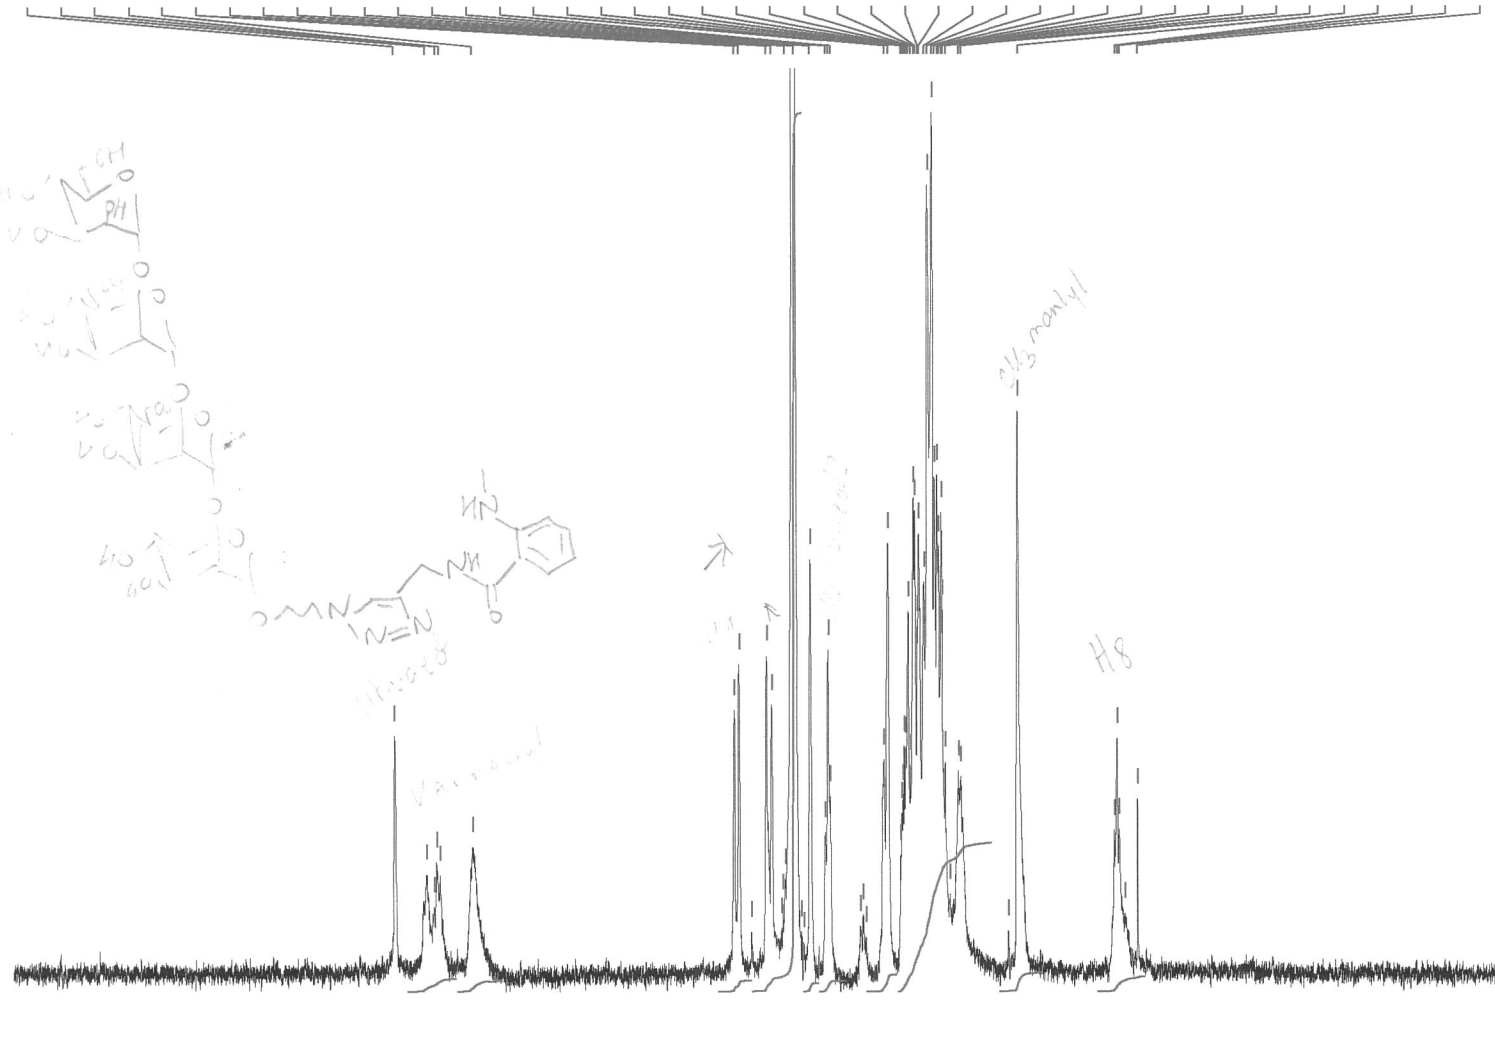

10 9 8 7 6 5 4 3 2 1 0 ppm

1.15  
0.98  
1.02  
77.48  
0.77  
0.93  
1.55  
13.11  
1.67  
1.34



MP1/158

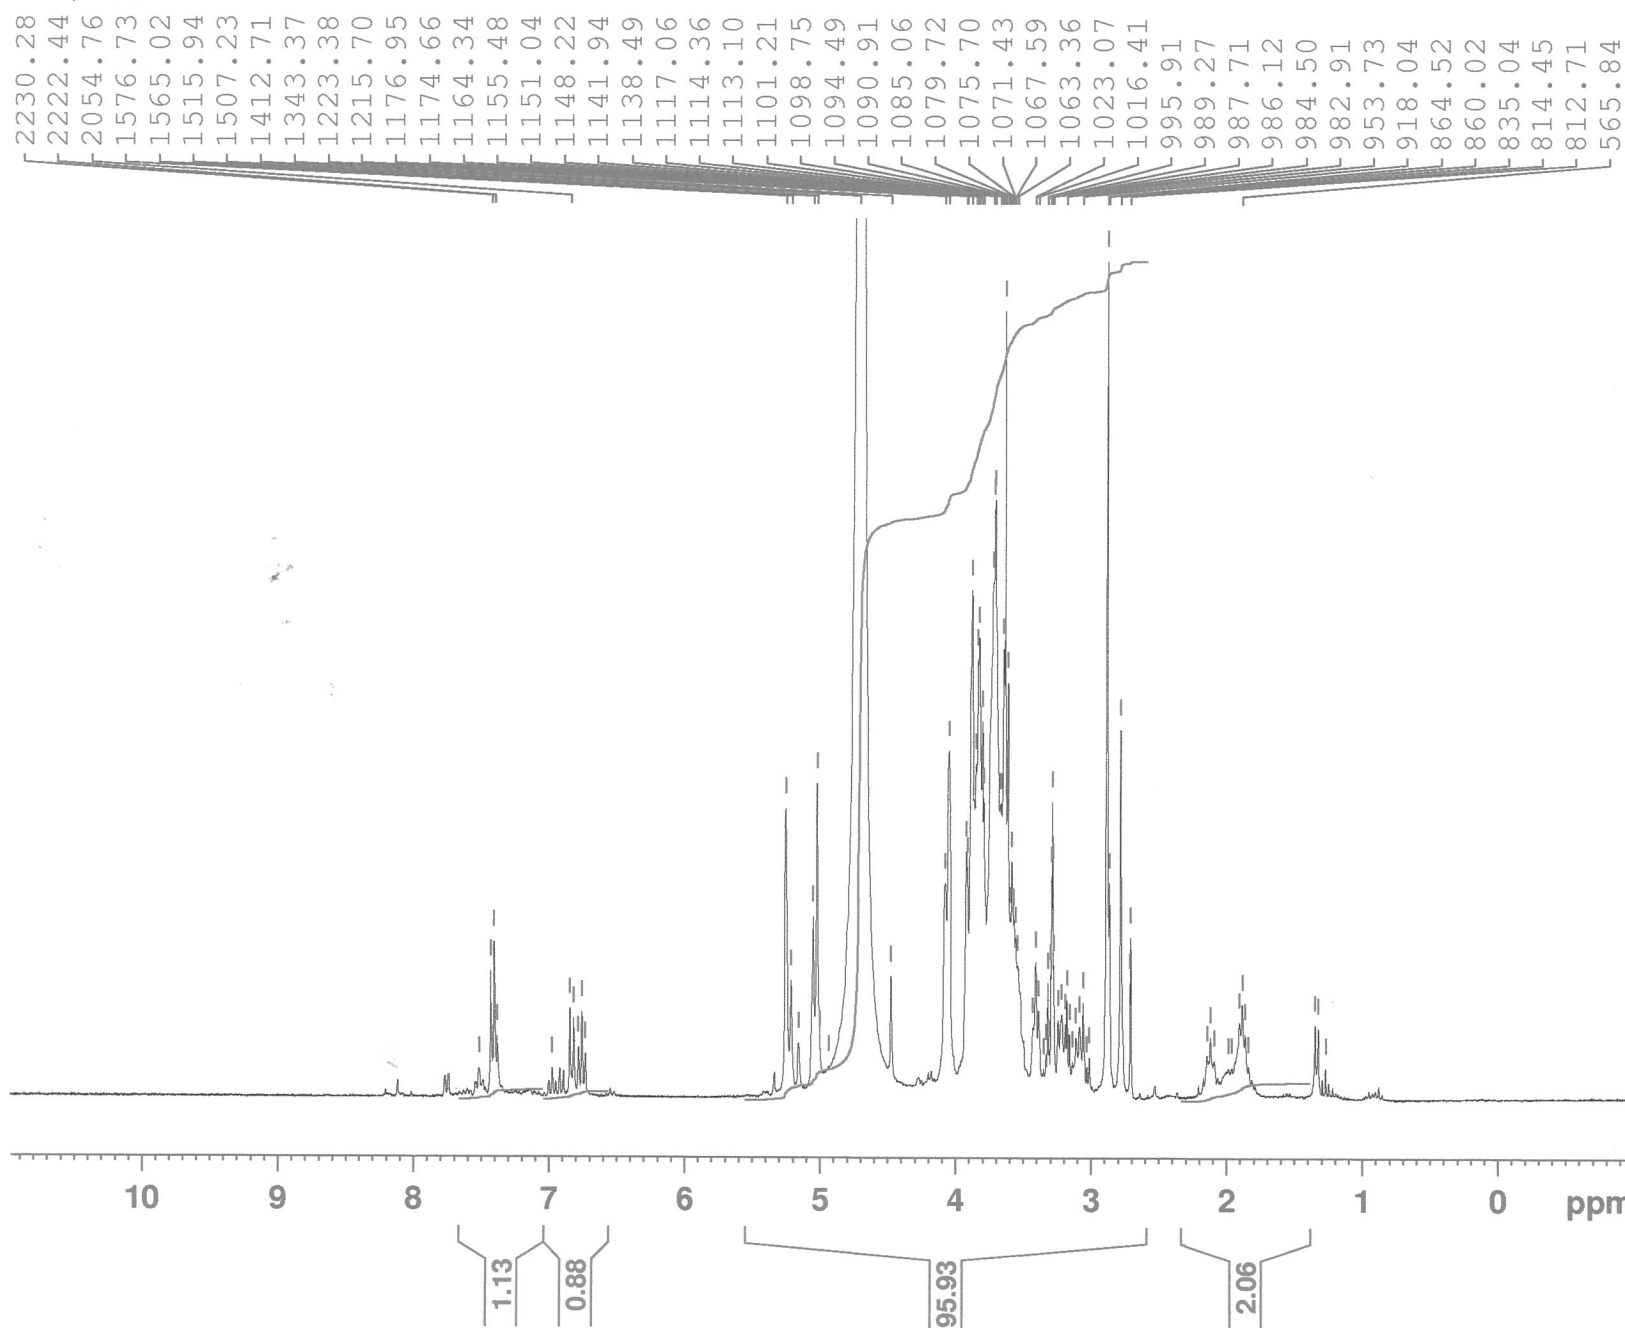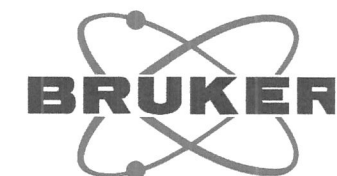

Current Data Parameters  
 NAME Mar02-2012-JMM  
 EXPNO 120  
 PROCNO 1

F2 - Acquisition Parameters  
 Date\_ 20120302  
 Time 16.45  
 INSTRUM spect  
 PROBHD 5 mm PABBO BB-  
 PULPROG zg30  
 TD 43268  
 SOLVENT D2O  
 NS 32  
 DS 2  
 SWH 6009.615 Hz  
 FIDRES 0.138893 Hz  
 AQ 3.5999477 sec  
 RG 144  
 DW 83.200 usec  
 DE 6.50 usec  
 TE 294.8 K  
 D1 1.00000000 sec  
 TD0 1

==== CHANNEL f1 =====  
 NUC1 1H  
 P1 13.60 usec  
 PLW1 7.00000000 W  
 SFO1 300.1815009 MHz

F2 - Processing parameters  
 SI 65536  
 SF 300.1800000 MHz  
 WDW EM  
 SSB 0  
 LB 0.30 Hz  
 GB 0  
 PC 1.00

MP1/153

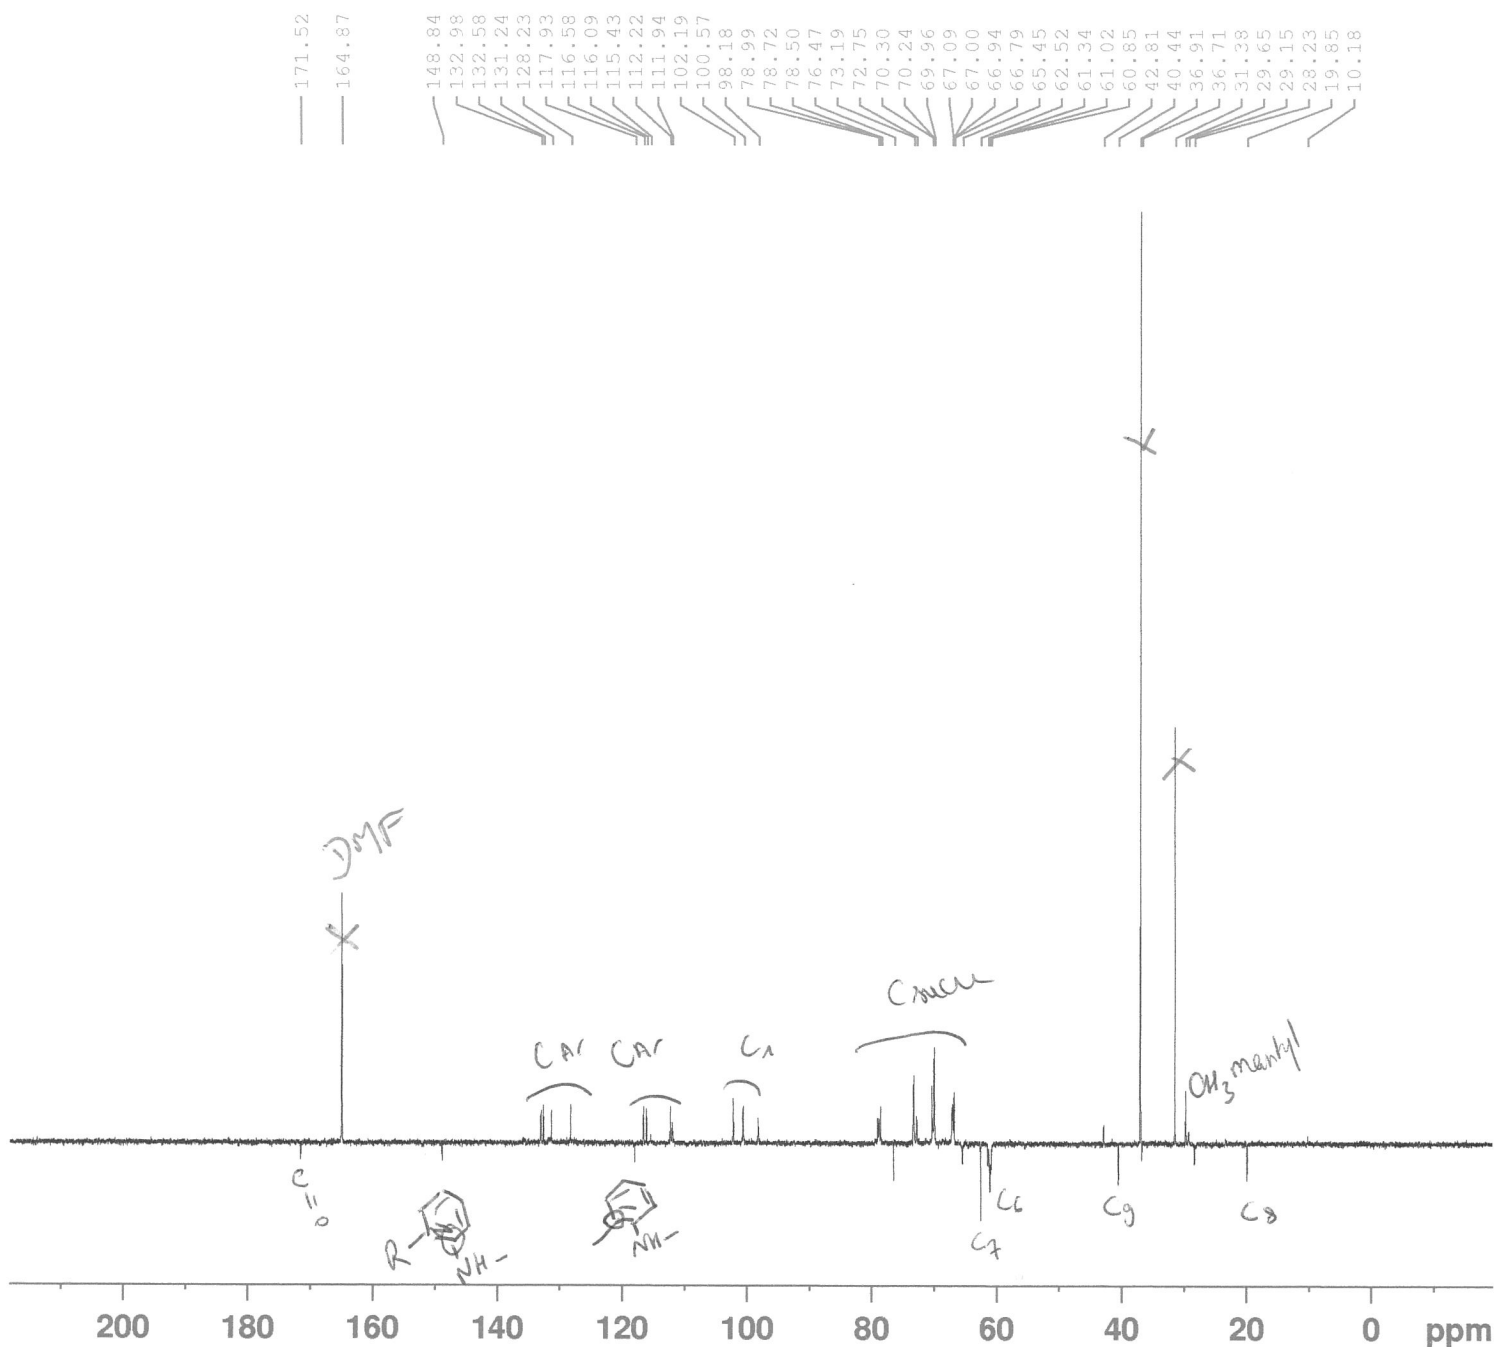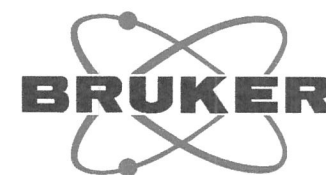

Current Data Parameters  
 NAME Feb24-2012-JMM  
 EXPNO 81  
 PROCNO 1

F2 - Acquisition Parameters  
 Date\_ 20120225  
 Time 1.35  
 INSTRUM spect  
 PROBHD 5 mm PABBO BB-  
 PULPROG jmod  
 TD 65536  
 SOLVENT D2O  
 NS 5000  
 DS 4  
 SWH 18028.846 Hz  
 FIDRES 0.275098 Hz  
 AQ 1.8175818 sec  
 RG 2050  
 DW 27.733 usec  
 DE 6.50 usec  
 TE 295.3 K  
 CNST2 145.0000000  
 CNST11 1.0000000  
 D1 2.00000000 sec  
 D20 0.00689655 sec  
 TD0 1

==== CHANNEL f1 =====  
 NUC1 13C  
 P1 9.00 usec  
 P2 18.00 usec  
 PLW1 38.00000000 W  
 SFO1 75.4878691 MHz

==== CHANNEL f2 =====  
 CPDPRG2 waltz16  
 NUC2 1H  
 PCPD2 100.00 usec  
 PLW2 7.00000000 W  
 PLW12 0.13964000 W  
 SFO2 300.1812007 MHz

F2 - Processing parameters  
 SI 32768  
 SF 75.4803210 MHz  
 WDW EM  
 SSB 0  
 LB 1.00 Hz  
 GB 0  
 PC 1.40
